# Supplementary material
Source: PubMed Central journal article supplement (PMC4702986)
Supplement: pnas.1509499112.sapp.pdf [file pnas.1509499112.sapp.pdf]

**Casein kinase II promotes target silencing by miRISC through direct phosphorylation of the DEAD-box RNA helicase CGH-1**

**Supporting Information Corrected February 08, 2016**

**Supporting Information**

Supplemental figures

Supplemental figure legends

Supplemental materials and methods

Supplemental tables

Supplemental table legends

## SUPPLEMENTAL FIGURE LEGENDS

**Figure S1. RNAi efficiently knocks down CK2.** (A) *kin-10* mRNA is efficiently depleted by *kin-10* RNAi at L3 (F1 RNAi, 1:1 dilution with vector) and young adult stage (P0 RNAi, full strength). (B) KIN-3 protein is efficiently depleted in late L4-young adult by *kin-3* RNAi (P0 RNAi, 1:1 dilution with vector).

**Figure S2. CK2 promotes miRNA-mediated adult hypodermal remodeling.** (A) *kin-3* and *kin-10* RNAi delay expression of adult-specific *Pcol-19::gfp* reporter. Penetrance of GFP expression was substantially decreased in populations fed *kin-3* and *kin-10* RNAi versus vector at time points spanning young to gravid adulthood (60 hr, 72 hr and 80 hr post L1 at 20°C). Mean and standard deviation of biological replicates are plotted (n>50 each). (B) KIN-3 is broadly expressed in larval animals. Top panels: Fluorescence microscopy of KIN-3::GFP driven by a 2 kb *kin-3* endogenous promoter. Bottom panels: DIC.

**Figure S3. RNAi treatments do not cause substantial developmental delay by L2 stage.** Representative images of larvae used in LIN-14 western blot analysis taken at the same magnification. Substantial growth observed between 8 hr and 20 hr suggests a lack of RNAi-induced developmental delay.

**Figure S4. CK2 does not affect miRNA levels.** (A) CK2 RNAi does not affect global miRNA abundance. Mature miRNA levels are quantified by deep sequencing and represented as number of reads mapping to each mature miRNA normalized to total mapped library size in millions (RPM). (B) Global analysis in (A) was confirmed by northern blotting: *kin-3* and *kin-10* RNAi do not alter levels of precursor or mature miR-1 or miR-58 in wild-type or *alg-1(tm369)*.

**Figure S5. CGH-1 and DDX6 have N-terminal intrinsically disordered regions that contain S2.** Amino acid sequence of (A) CGH-1 and (B) DDX6 are plotted on the x-axis. Regions of the protein above the dotted line, highlighted in orange, are predicted to be intrinsically disordered. S2 is marked with a blue asterisk.

**Figure S6. Relative CGH-1::GFP expression of S2 variants.** CGH-1::GFP expression was determined by SDS-PAGE and western blotting lysates of young adults (52 hr 20°C) using antibodies against GFP and endogenous CGH-1.  $\gamma$ -Tubulin was used as a loading control. (A) Soma-enriched expression of wild-type and S2 variant CGH-1::GFP expressing strains. *glp-1* RNAi was used to deplete germline. Two exposures of the anti-CGH-1 western blot are shown to best illustrate expression of either CGH-1::GFP (exposure 1) or endogenous CGH-1 (exposure 2). (B) Expression of CGH-1::GFP. Band specificity demonstrated in S2 fed *cgh-1* RNAi [Lane 1] or *gfp* RNAi [Lane 2], to knockdown endogenous *cgh-1* or both the *cgh-1::gfp* transgene and endogenous *cgh-1*, respectively, compared to no RNAi treatment [Lane 3]. Wild-type CGH-1::GFP = S2. Phospho-defective CGH-1::GFP= S2A Lines 1 and 2. Phospho-mimic CGH-1::GFP= S2D and S2E.

**Figure S7. Post-dauer suppression of miRNA phenotypes requires KIN-3, but not CK2 phosphorylation of CGH-1.** (A) KIN-3 is required for post-dauer suppression of *alg-1(gk214)* alae defects. *alg-1(gk214)* on vector RNAi significantly suppress alae defects in post-dauer development (PDD). *kin-3* RNAi abrogates suppression of defective alae phenotypes in PDD (significance determined by two-tailed Student's *t*-test of biological replicates, mean and standard deviation are plotted,  $n \geq 39$  per replicate). (B) Phosphorylation of CGH-1 is required only during continuous development (CD), and not during post-dauer development (PDD). Strains were grown at the permissive temperature until the L2 molt (for CD) or dauer (for PDD) (see Methods). Asterisk indicates  $p < 0.0001$  by two-tailed Fisher's exact test,  $n > 60$ , each experiment was carried out at least twice. For all: TG= transgene, S2A Lines 1 and 2 = phospho-defective, S2D/E = phospho-mimic.

## SUPPLEMENTAL MATERIALS AND METHODS

**Plasmids and Transgenic Strains.** The *kin-3::gfp* reporter plasmid (pJK194) was generated by introducing the following fragments into pJK211 (a derivation of Fire vector pPD49.26): *kin-3* endogenous promoter (2.0 kb fragment immediately upstream of the *kin-3* start codon), *kin-3* genomic coding region (2.2 kb fragment with mutated termination codon), *gfp* coding region (0.9 kb fragment with synthetic introns and termination codon), and *kin-3* endogenous 3'UTR (1.2 kb fragment immediately downstream of *kin-3* termination codon). The *Pmef-2::gfp::mef-2* 3'UTR reporter (KP#1438) was generated by sub-cloning the following fragments into *gfp* 3'UTR reporter KP#1436 (55): *mef-2* endogenous promoter (4.1kb fragment upstream of the *mef-2* coding region) and *mef-2* endogenous 3'UTR (2.2kb fragment downstream of *mef-2* termination codon). The two most 5' miR-1 sites in the *mef-2* 3'UTR were scrambled to abrogate seed recognition using SOE-PCR and subcloned into KP#1438 to create the *Pmef-2::gfp::mef-2* 3'UTR (*scrambled miR-1 sites I and II*) plasmid. The *cgh-1::gfp* reporter plasmid (pJK297) was generated by introducing the following fragments into pJK211: *cgh-1* endogenous promoter and genomic coding region (~3.7 kb fragment including 2.1 kb immediately upstream of the *cgh-1* start codon and the *cgh-1* coding region with mutated termination codon), *gfp* coding region (0.9 kb fragment with synthetic introns and termination codon), and *unc-54* 3'UTR (0.76 kb PCR fragment downstream of the *unc-54* termination codon which includes the 282 bp annotated *unc-54* 3'UTR. *cgh-1::gfp* S2 variants were generated from pJK297 by introducing site-specific mutations to alter serine to encode alanine (pJK789), aspartic acid (pJK787), or glutamic acid (pJK791) Reporter plasmids were used to generate multi-copy integrated transgenes as described (80).

The *cgh-1* 3'UTR RNAi clone (pJK301), which was made by subcloning a ~0.5 kb fragment amplified from the *cgh-1* 3'UTR into the vector, *L4440* [Primer 1: ACACTAGTTCTCATATCCCCAAACCTCCAAAACACACAGCGGCCGCCATATCCCCAACCTCCAAAACAC (Not-I); Primer 2: AATGTGGTGCGGCTCAACAGAATAACTACAAATGCTAGCCGGCTCAACAGAATAAC TACA (Nhe I)], followed by transformation into *E. coli* HT115.

**Modified RNAi Conditions.** Since several genes in this study are essential for development and/or fertility, feeding RNAi (i) duration (one versus two generations) and (ii) strength (RNAi cultures were diluted with cultures from bacteria expressing the empty vector *L4440*) were optimized to achieve a balance of efficient knockdown and viability. For RNAi spanning two generations, two rounds of synchronization were performed. RNAi conditions for alae defect, seam cell number, adult collagen (*Pcol-19::gfp*) expression, lethargus, Rup, and Muv assays were as follows: *kin-3* RNAi (1 generation, no dilution), *kin-10* RNAi (2 generations, 1:1 dilution), *alg-1* RNAi (1 generation, 1:1 dilution), *ain-1* RNAi (2 generations, no dilution), and *nhl-2* RNAi (2 generations, no dilution). RNAi for *mef-2* GFP reporters were for two generations as follows, images of young adults were taken in the second generation: *kin-3* RNAi (P0 1:2 dilution, F1 1:1 dilution), *kin-10* RNAi (P0 and F1 1:1 dilution), *alg-1* RNAi (P0 vector, F1 1:1 dilution), and both *gfp* and *vector* RNAi (P0 and F1 no dilution). RNAi for LIN-14 western analysis was as follows: *kin-3* RNAi (1 generation, 1:2 dilution), *kin-10* RNAi (1 generation, 1:1 dilution), *alg-1* RNAi (2 generations: P0 at 1:2 and F1 at 1:1), and *lin-14* RNAi (1 generation, 1:1 dilution). RNAi conditions for analysis of *lin-41* and *daf-12* mRNA levels are as follows: *kin-3* RNAi (1 generation, no dilution), *kin-10* RNAi (1 generation, no dilution), *alg-1* RNAi (1 generation, 1:1 dilution). The aforementioned RNAi conditions were also used for GFP::ALG-1 RIP samples with the addition of *gfp* RNAi (1 generation, no dilution). Additional modifications to the standard feeding protocol include: (i) assays with QK005 were grown on vector RNAi for 36 hr, transferred to undiluted RNAi, then scored for ASEL neuron specification as adults, (ii) assays with MT14119 were grown on vector RNAi until the L3 larval stage, then transferred to undiluted RNAi; adults were removed post-egg lay and their eggs scored for viability. *gfp-1* RNAi for CGH-1::GFP co-IP experiment was fed from starved L1 to L4 (40h) at 25°C. Adult sterility was verified at 96 hr. Other temperature modifications include: QK005, SD551, and QK039-QK044 were grown at 25°C. MT14119 and parallel experiments with wild-type (N2) were grown at 15°C.

### **Dauer Induction and Post-Dauer Phenotyping**

For *kin-3* RNAi experiments *alg-1(gk214)* embryos isolated by alkaline-hypochlorite embryo extraction were plated directly on RNAi at 20°C. For continuous development, animals were grown for 2-3 days to reach young adult stage. For post-dauer development post-dauer development, animals were grown on RNAi plates with crude dauer pheromone (81) in parallel to animals in continuous development. After 2-3 days, dauer were picked by morphology to fresh RNAi plates lacking pheromone. These post-dauer larvae were grown for an additional day to reach young adult stage. For comparison between continuous development and post-dauer development in QK039-QK044, strains were maintained at 20°C. For continuous development, a synchronized population was obtained by an adult egg lay for 3-4 hrs at 20°C. Adults were removed and progeny were kept at 20°C for ~30 hrs (until the L2 molt). Larvae were then shifted to 25°C where they grew for another 40-45 hrs (~24 hrs past L4 molt). For post-dauer development, dauers were selected from populations starved at 20°C by treatment in 1% SDS for 20 minutes. Dauers were then grown on fresh plates at 25°C for 48 hrs (~24 hrs past the L4 molt). For analysis of continuous development only QK039-QK044 were kept at 25°C from adult egg lay. In all cases, each individual was categorized as having either no adult alae, gapped adult alae, or complete adult alae. One side was scored per individual using DIC optics on a Zeiss Axiolmager D2 compound microscope.

**Immunoprecipitation.** The following adaptations of (74) were used to perform immunoprecipitations for mass spectrometry: *C. elegans* homogenates were suspended in lysis buffer (50 mM HEPES pH 7.4, 1 mM EGTA, 1 mM MgCl<sub>2</sub>, 100 mM KCl, 10% glycerol, 0.05% NP-40 supplemented with Complete, Mini, EDTA-free Protease Inhibitor Cocktail tablet (Roche Applied Sciences), and clarified by centrifugation at 12,000X g for 12 min at 4°C. For immunoprecipitations, primary antibody conjugated to Dynabeads Protein A (Invitrogen) was incubated with homogenates at 4°C for 4 hr, then washed three times with wash buffer (50 mM HEPES pH 7.4, 1 mM EGTA, 1 mM MgCl<sub>2</sub>, 300 mM KCl, 10% glycerol, 0.05% NP-40 supplemented with Complete, Mini, EDTA-free Protease Inhibitor Cocktail tablet (Roche Applied Sciences). Phosphatase inhibitor (Roche Applied Sciences) was added to lysis and wash buffers for AIN-1 mass

spectrometry and CGH-1 phosphoproteomic mass spectrometry samples. Immunoprecipitated proteins were eluted from beads with three aliquots of 150  $\mu$ L of 0.1 M glycine, pH 2.6. Eluates were neutralized with 150  $\mu$ L of 2M Tris-HCl, pH 8.5, combined with 1/5 volume of 100% trichloroacetic acid, and precipitated overnight at 4°C. Proteins were pelleted by centrifugation at 20,000X g for 30 min and washed twice with acetone.

**Mass spectrometry.** Unless otherwise noted, all chemicals were purchased from Thermo Fisher Scientific (Waltham, MA). Deionized water (18.2 MW, Barnstead, Dubuque, IA) was used for all preparations. Buffer A consists of 5% acetonitrile 0.1% formic acid, buffer B consists of 80% acetonitrile 0.1% formic acid, and buffer C consists of 500 mM ammonium acetate. All buffers were filtered through 0.2 mm membrane filters (PN4454, Pall Life Sciences, Port Washington, NY). Immunoprecipitated protein pellets were dissolved in digestion buffer (0.1% [w/v] Rapigest [Waters Corporation] in 50 mM Ammonium Bicarbonate), and then reduced with TCEP (Tris[2-Carboxyethyl]-Phosphine Hydrochloride), alkylated with iodoacetamide, and digested with trypsin. A MudPIT microcolumn was prepared by first creating a Kasil frit at one end of an undeactivated 250 mm ID/360 mm OD capillary (Agilent Technologies, Inc., Santa Clara, CA). The Kasil frit was prepared by briefly dipping a 20 - 30 cm capillary in well-mixed 300 mL Kasil 1624 (PQ Corporation, Malvern, PA) and 100 mL formamide, curing at 100°C for 4 hrs, and cutting the frit to ~2 mm in length. Strong cation exchange particles (SCX Partisphere, 5 mm dia., 125 Å pores, Whatman) were packed in-house from particle slurries in methanol to 2.5 cm. 2.5 cm reverse phase particles (C18 Aqua, 3 mm dia., 125 Å pores, Phenomenex, Torrance, CA) were then packed into the capillary using the same method as SCX loading, to create a biphasic column. The MudPIT microcolumn was equilibrated using 60% buffer A, 40% buffer B for 5 min followed by 100% buffer A for 15 min. An analytical RPLC column was generated by pulling a 100 mm ID/360 mm OD capillary (Polymicro Technologies, Inc, Phoenix, AZ) to 5 mm ID tip. Reverse phase particles (Aqua C18, 3 mm dia., 125 Å pores, Phenomenex, Torrance, CA) were packed directly into the pulled column at 800 psi until 12 cm long. The column was further packed, washed, and equilibrated with buffer B followed by buffer A. The MudPIT microcolumn was connected to an analytical column

using a zero-dead volume union (Upchurch Scientific (IDEX Health & Science), P-720-01, Oak Harbor, WA). LC-MS/MS analysis was performed using an Eksigent nano-flow pump and a Thermo LTQ-Orbitrap using an in-house built electrospray stage. MudPIT experiments were performed where each step corresponds to 0, 10, 20, 30, 40, 50, 60, 70, 80, 90 and 100% buffer C being run for 5 min at the beginning of each gradient of buffer B. Electrospray was performed directly from the analytical column by applying the ESI voltage at a tee (150 mm ID, Upchurch Scientific) while flowing at 350 nL/min through the columns. Electrospray directly from the LC column was done at 2.5 kV with an inlet capillary temperature of 250 °C. Data-dependent acquisition of MS/MS spectra with the LTQ-Orbitrap were performed with the following settings: MS/MS on the 10 most intense ions per precursor scan, 1 microscan, unassigned and charge state 1 reject; dynamic exclusion repeat count, 1, repeat duration, -30 second; exclusion list size 120; and exclusion duration, 120 second. Tandem mass spectra were extracted from raw files using RawExtract 1.9.9 and were searched against a worm protein database (<http://www.wormbase.org>) with reversed sequences using ProLuCID. The search space included all fully- and half-tryptic peptide candidates. Carbamidomethylation (+57.02146) of cysteine was considered as a static modification. Peptide candidates were filtered using DTASelect, with filtering parameters listed in the supplementary tables.

## **SUPPLEMENTAL TABLE LEGENDS**

**Table S1:** Mass spectrometry of AIN-1 complexes

**Table S2:** Percent lethargus in wild-type (N2) with CK2 RNAi.

**Table S3:** Percent embryonic lethality in wild-type (N2) with CK2 RNAi.

**Table S4:** Quantification of mature miRNAs.

**Table S5:** Mass spectrometry of CGH-1 complexes.

**Table S6:** Phosphoproteomic analysis of mass spectrometry of CGH-1 complexes.

**Table S7:** *C. elegans* strains used in this study.

**Table S8:** Oligos, Probes, and Peptides used in this study.



Figure S1

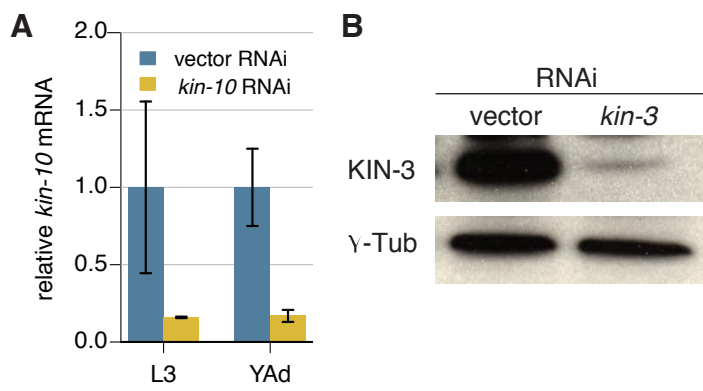

Figure S2

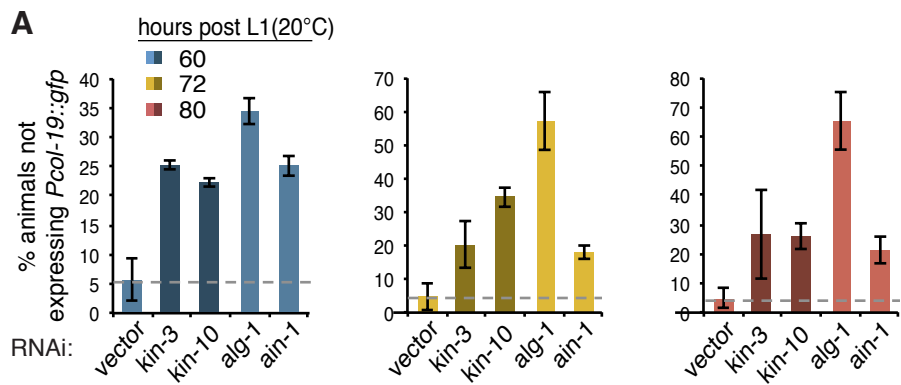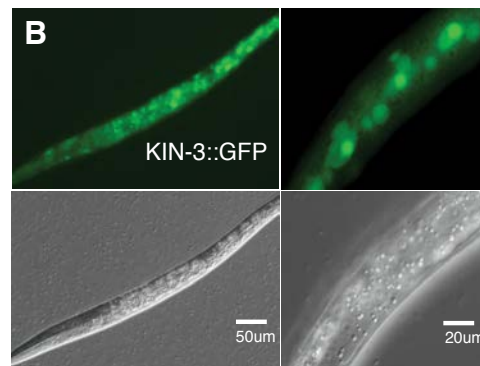

Figure S3

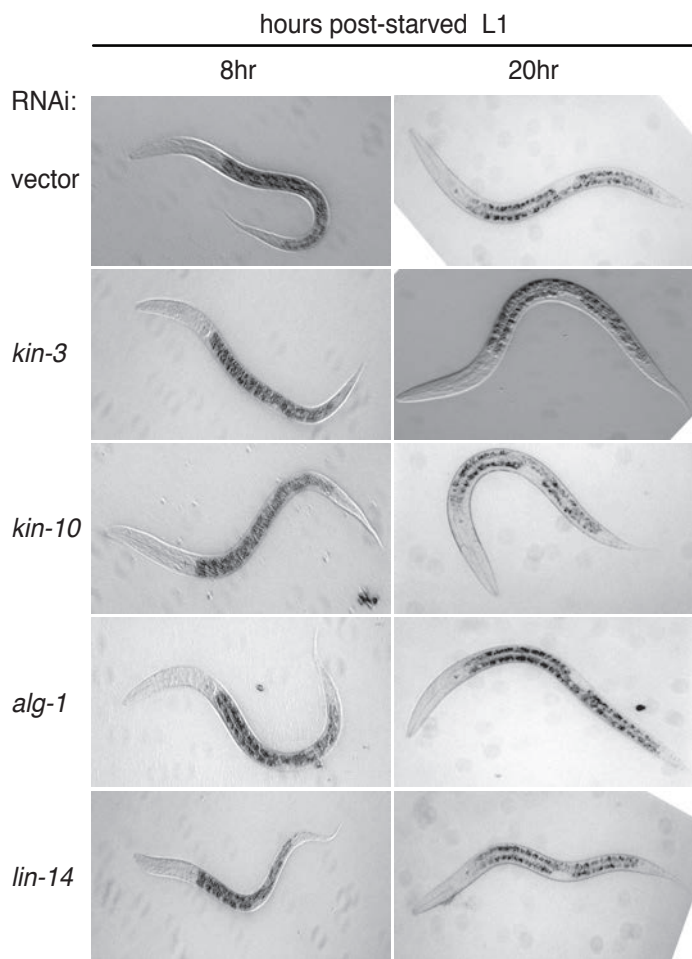

Figure S4

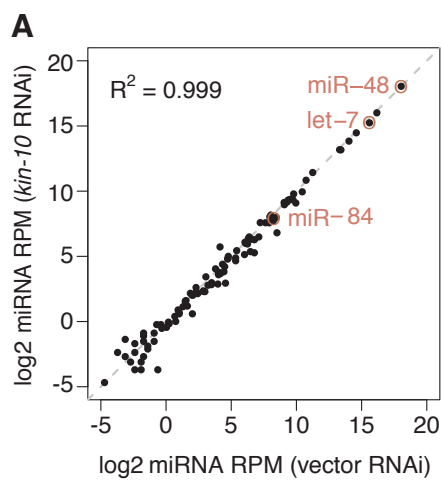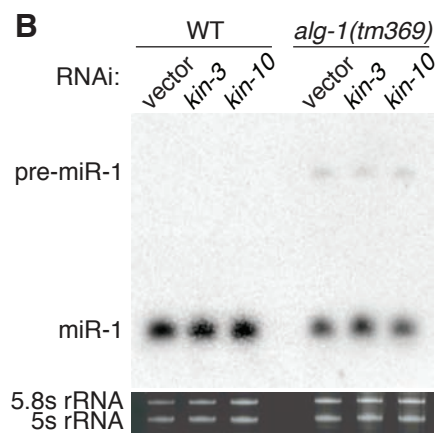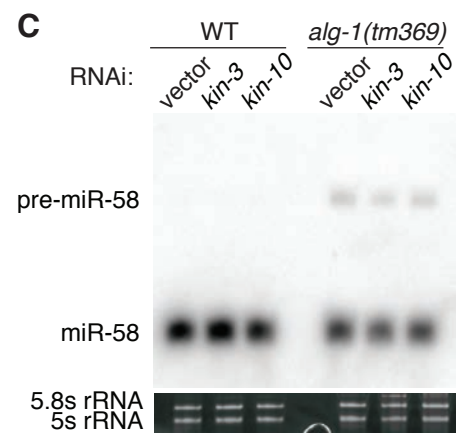

Figure S5

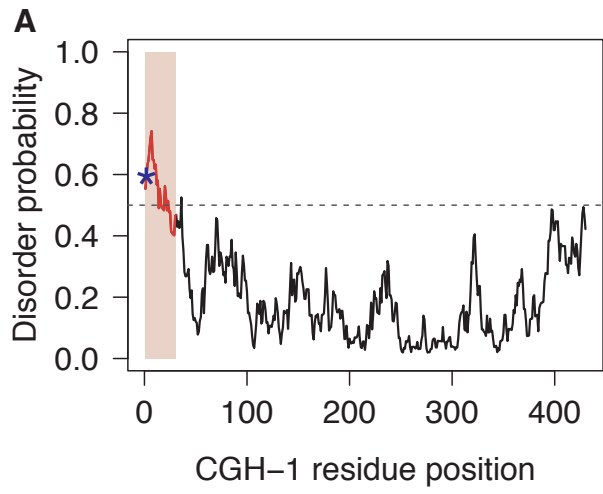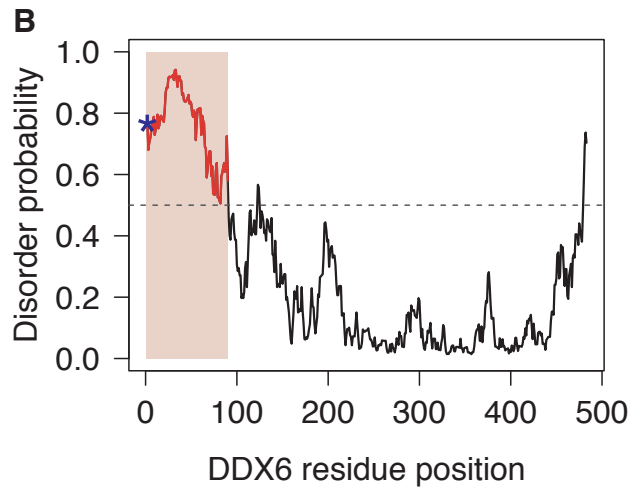

Figure S6

**A**

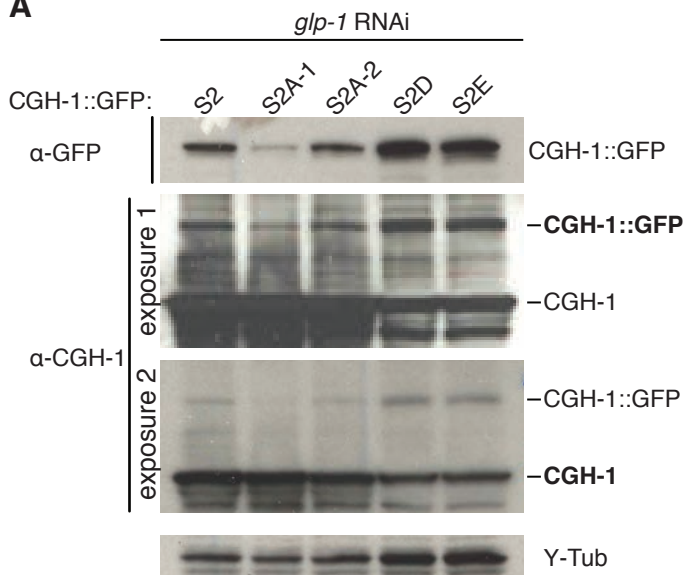

**B**

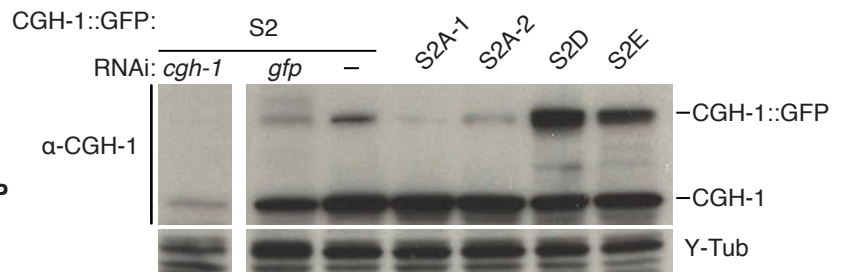

Figure S7

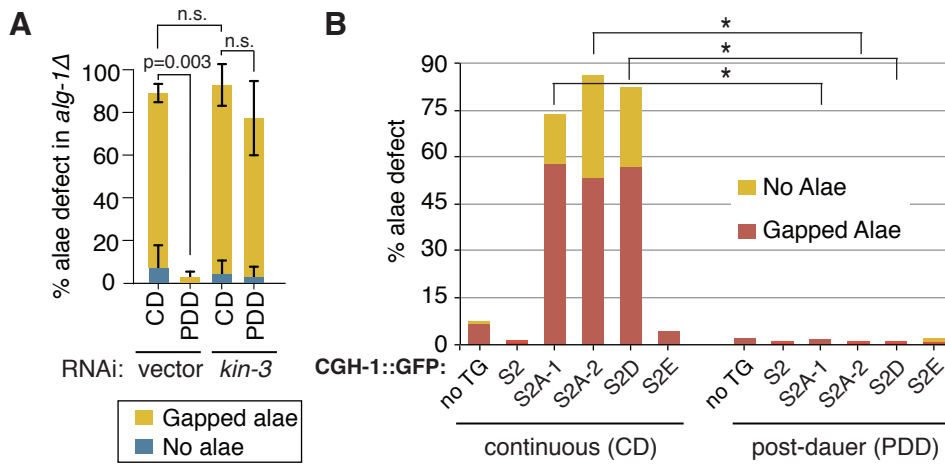

Table S1

| Instrument | Filtering parameter                                                                          |
|------------|----------------------------------------------------------------------------------------------|
| LTQ        | -p 1 -y 1 --trypstat --pfp 0.01 --modstat --extra --pl --DB --dm -in --brief --quiet         |
| Orbitrap   | -p 1 -y 1 --trypstat --pfp 0.01 --modstat --extra --pl --DM 10 --DB --dm -in --brief --quiet |

| Accession       | Peptide counts |                           |             |                                | Spectral counts |                           |             |                                | Sequence coverage |                           |              |                                | Protein                                                              | Total spectral counts |                       |
|-----------------|----------------|---------------------------|-------------|--------------------------------|-----------------|---------------------------|-------------|--------------------------------|-------------------|---------------------------|--------------|--------------------------------|----------------------------------------------------------------------|-----------------------|-----------------------|
|                 | WT LTQ         | <i>ain-1</i> (tm3681) LTQ | WT orbitrap | <i>ain-1</i> (tm3681) orbitrap | WT LTQ          | <i>ain-1</i> (tm3681) LTQ | WT orbitrap | <i>ain-1</i> (tm3681) orbitrap | WT LTQ            | <i>ain-1</i> (tm3681) LTQ | WT orbitrap  | <i>ain-1</i> (tm3681) orbitrap |                                                                      | WT                    | <i>ain-1</i> (tm3681) |
| F48F7.1         | 28             | 0                         | 24          | 0                              | 66              | 0                         | 51          | 0                              | 26.90%            | 0                         | 30.10%       | 0                              | ALG-1                                                                | 117                   | 0                     |
| T07D3.7         | 19             | 0                         | 19          | 0                              | 45              | 0                         | 30          | 0                              | 20.10%            | 0                         | 26.90%       | 0                              | ALG-2                                                                | 75                    | 0                     |
| C06G1.4         | 23             | 7                         | 20          | 13                             | 45              | 8                         | 23          | 16                             | 36.00%            | 15.30%                    | 33.10%       | 25.60%                         | AIN-1                                                                | 68                    | 24                    |
| C07H6.5         | 8              | 1                         | 0           | 0                              | 33              | 1                         | 0           | 0                              | 20.50%            | 4.90%                     | 0            | 0                              | CGH-1                                                                | 33                    | 1                     |
| <b>T01G9.6</b>  | <b>2</b>       | <b>0</b>                  | <b>0</b>    | <b>0</b>                       | <b>2</b>        | <b>0</b>                  | <b>0</b>    | <b>0</b>                       | <b>12.00%</b>     | <b>0</b>                  | <b>0</b>     | <b>0</b>                       | <b>KIN-10</b>                                                        | <b>2</b>              | <b>0</b>              |
| F56D12.5        | 1              | 0                         | 0           | 0                              | 2               | 0                         | 0           | 0                              | 4.20%             | 0                         | 0            | 0                              | VIG-1                                                                | 2                     | 0                     |
| <b>B0205.7</b>  | <b>1</b>       | <b>0</b>                  | <b>1</b>    | <b>0</b>                       | <b>1</b>        | <b>0</b>                  | <b>1</b>    | <b>0</b>                       | <b>3.60%</b>      | <b>0</b>                  | <b>3.60%</b> | <b>0</b>                       | <b>KIN-3</b>                                                         | <b>2</b>              | <b>0</b>              |
| F41E6.2         | 0              | 1                         | 0           | 1                              | 0               | 1                         | 0           | 1                              | 0                 | 16.70%                    | 0            | 12.70%                         | CE10246 WBGene00001694 locus:grd-5 status:Confirmed TR:O16462 p      | 0                     | 2                     |
| F26D12.1a       | 0              | 0                         | 0           | 2                              | 0               | 0                         | 0           | 2                              | 0                 | 0                         | 0            | 4.20%                          | CE36294 WBGene00001439 locus:fkx-7 status:Partially_confirmed TR:Q   | 0                     | 2                     |
| T28D6.4         | 0              | 1                         | 0           | 0                              | 0               | 2                         | 0           | 0                              | 0                 | 1.10%                     | 0            | 0                              | CE16523 WBGene00012124 Ank repeat (8 domains) status:Partially_conf  | 0                     | 2                     |
| H20J18.1b       | 0              | 0                         | 0           | 2                              | 0               | 0                         | 0           | 2                              | 0                 | 0                         | 0            | 4.60%                          | CE31554 WBGene00004739 locus:scd-1 status:Confirmed TR:Q8MQ12        | 0                     | 2                     |
| H20J18.1a       | 0              | 0                         | 0           | 2                              | 0               | 0                         | 0           | 2                              | 0                 | 0                         | 0            | 4.40%                          | CE18818 WBGene00004739 locus:scd-1 status:Confirmed TR:Q9XXK5 p      | 0                     | 2                     |
| F35H10.1        | 0              | 0                         | 0           | 1                              | 0               | 0                         | 0           | 1                              | 0                 | 0                         | 0            | 18.10%                         | CE04501 WBGene00001904 locus:his-30 histone H2A status:Predicted S   | 0                     | 1                     |
| K06C4.3         | 0              | 0                         | 0           | 1                              | 0               | 0                         | 0           | 1                              | 0                 | 0                         | 0            | 18.10%                         | CE04501 WBGene00001895 locus:his-21 histone H2A status:Predicted S   | 0                     | 1                     |
| F31D4.3         | 0              | 1                         | 0           | 0                              | 0               | 1                         | 0           | 0                              | 0                 | 4.20%                     | 0            | 0                              | CE15929 WBGene00001431 locus:fkx-6 FKBP-type peptidyl-prolyl cis-tra | 0                     | 1                     |
| H02I12.7        | 0              | 0                         | 0           | 1                              | 0               | 0                         | 0           | 1                              | 0                 | 0                         | 0            | 18.10%                         | CE04501 WBGene00001939 locus:his-65 Core histones H2A, H2B, H3 a     | 0                     | 1                     |
| T10C6.12        | 0              | 0                         | 0           | 1                              | 0               | 0                         | 0           | 1                              | 0                 | 0                         | 0            | 18.10%                         | CE04501 WBGene00001877 locus:his-3 histone H2A status:Partially_conf | 0                     | 1                     |
| ZK131.6         | 0              | 0                         | 0           | 1                              | 0               | 0                         | 0           | 1                              | 0                 | 0                         | 0            | 18.10%                         | CE04501 WBGene00001886 locus:his-12 histone H2A status:Predicted S   | 0                     | 1                     |
| C05D10.1b       | 0              | 0                         | 0           | 1                              | 0               | 0                         | 0           | 1                              | 0                 | 0                         | 0            | 4.20%                          | CE30420 WBGene000015477 status:Partially_confirmed TR:Q8T3F6 prot    | 0                     | 1                     |
| C05D10.1c       | 0              | 0                         | 0           | 1                              | 0               | 0                         | 0           | 1                              | 0                 | 0                         | 0            | 3.90%                          | CE37698 WBGene00015477 status:Partially_confirmed TR:Q5TYM0 prot     | 0                     | 1                     |
| C05D10.1a       | 0              | 0                         | 0           | 1                              | 0               | 0                         | 0           | 1                              | 0                 | 0                         | 0            | 3.40%                          | CE24783 WBGene000015477 status:Partially_confirmed SW:Q11178 prot    | 0                     | 1                     |
| B0035.7         | 0              | 0                         | 0           | 1                              | 0               | 0                         | 0           | 1                              | 0                 | 0                         | 0            | 18.10%                         | CE04501 WBGene00001921 locus:his-47 histone H2A status:Confirmed     | 0                     | 1                     |
| C50F4.13        | 0              | 0                         | 0           | 1                              | 0               | 0                         | 0           | 1                              | 0                 | 0                         | 0            | 18.10%                         | CE05477 WBGene00001909 locus:his-35 histone H2A status:Confirmed     | 0                     | 1                     |
| C06G1.1         | 0              | 1                         | 0           | 0                              | 0               | 1                         | 0           | 0                              | 0                 | 1.90%                     | 0            | 0                              | CE27054 WBGene000015545 status:Partially_confirmed TR:Q17743 prot    | 0                     | 1                     |
| F54E12.5        | 0              | 0                         | 0           | 1                              | 0               | 0                         | 0           | 1                              | 0                 | 0                         | 0            | 18.10%                         | CE04501 WBGene00001931 locus:his-57 histone H2A status:Predicted S   | 0                     | 1                     |
| F52B5.6         | 0              | 1                         | 0           | 0                              | 0               | 1                         | 0           | 0                              | 0                 | 8.90%                     | 0            | 0                              | CE05721 WBGene00004439 locus:rpl-25.2 60S ribosomal protein status:  | 0                     | 1                     |
| F55G1.10        | 0              | 0                         | 0           | 1                              | 0               | 0                         | 0           | 1                              | 0                 | 0                         | 0            | 18.10%                         | CE04501 WBGene00001935 locus:his-61 Histone status:Partially_confir  | 0                     | 1                     |
| Y59H11AR.2b     | 0              | 1                         | 0           | 0                              | 0               | 1                         | 0           | 0                              | 0                 | 1.20%                     | 0            | 0                              | CE33894 WBGene00022010 status:Partially_confirmed TR:Q86FP2 prot     | 0                     | 1                     |
| Y59H11AR.2a     | 0              | 1                         | 0           | 0                              | 0               | 1                         | 0           | 0                              | 0                 | 1.20%                     | 0            | 0                              | CE29894 WBGene00022010 status:Partially_confirmed TR:Q9N323 prot     | 0                     | 1                     |
| F26D12.1c       | 0              | 0                         | 0           | 1                              | 0               | 0                         | 0           | 1                              | 0                 | 0                         | 0            | 6.90%                          | CE36296 WBGene00001439 locus:fkx-7 status:Partially_confirmed TR:Q   | 0                     | 1                     |
| F26D12.1b       | 0              | 0                         | 0           | 1                              | 0               | 0                         | 0           | 1                              | 0                 | 0                         | 0            | 2.20%                          | CE36295 WBGene00001439 locus:fkx-7 status:Confirmed TR:Q86ME9 p      | 0                     | 1                     |
| ZK1098.1        | 0              | 1                         | 0           | 0                              | 0               | 1                         | 0           | 0                              | 0                 | 2.20%                     | 0            | 0                              | CE03847 WBGene000014218 WW/rsp5/VWV domain containing protein        | 0                     | 1                     |
| Y87G2A.3        | 0              | 1                         | 0           | 0                              | 0               | 1                         | 0           | 0                              | 0                 | 4.50%                     | 0            | 0                              | CE23129 WBGene00013595 status:Partially_confirmed TR:Q9NA30 prot     | 0                     | 1                     |
| K06C4.11        | 0              | 0                         | 0           | 1                              | 0               | 0                         | 0           | 1                              | 0                 | 0                         | 0            | 18.10%                         | CE04501 WBGene00001893 locus:his-19 histone H2A status:Predicted S   | 0                     | 1                     |
| F54E7.5         | 0              | 1                         | 0           | 0                              | 0               | 1                         | 0           | 0                              | 0                 | 4.30%                     | 0            | 0                              | CE01316 WBGene00018828 locus:sdz-21 status:Partially_confirmed TR:   | 0                     | 1                     |
| C16A3.9         | 0              | 1                         | 0           | 0                              | 0               | 1                         | 0           | 0                              | 0                 | 7.90%                     | 0            | 0                              | CE04009 WBGene00004482 locus:rps-13 40S ribosomal protein S13 sta    | 0                     | 1                     |
| F23C8.6         | 0              | 1                         | 0           | 0                              | 0               | 1                         | 0           | 0                              | 0                 | 6.30%                     | 0            | 0                              | CE20715 WBGene000017735 status:Confirmed TR:Q9TXI3 protein_id:AA     | 0                     | 1                     |
| Reverse_T22B7.7 | 0              | 1                         | 0           | 0                              | 0               | 1                         | 0           | 0                              | 0                 | 5.10%                     | 0            | 0                              | CE13952 WBGene00020674 status:Partially_confirmed TR:Q23044 prot     | 0                     | 1                     |
| C44B7.10        | 0              | 0                         | 0           | 1                              | 0               | 0                         | 0           | 1                              | 0                 | 0                         | 0            | 3.20%                          | CE32326 WBGene000016630 status:Confirmed TR:Q18599 protein_id:AA     | 0                     | 1                     |
| F07B7.3         | 0              | 0                         | 0           | 1                              | 0               | 0                         | 0           | 1                              | 0                 | 0                         | 0            | 18.10%                         | CE04501 WBGene00001927 locus:his-53 status:Predicted SW:P09588 p     | 0                     | 1                     |
| F45F2.4         | 0              | 0                         | 0           | 1                              | 0               | 0                         | 0           | 1                              | 0                 | 0                         | 0            | 18.10%                         | CE04501 WBGene00001881 locus:his-7 histone H2A status:Predicted S    | 0                     | 1                     |
| Y105E8B.1e      | 0              | 1                         | 0           | 0                              | 0               | 1                         | 0           | 0                              | 0                 | 3.50%                     | 0            | 0                              | CE31733 WBGene00002978 locus:lev-11 status:Partially_confirmed SW:   | 0                     | 1                     |
| Y105E8B.1c      | 0              | 1                         | 0           | 0                              | 0               | 1                         | 0           | 0                              | 0                 | 3.50%                     | 0            | 0                              | CE29059 WBGene00002978 locus:lev-11 status:Partially_confirmed SW:   | 0                     | 1                     |
| Y71H2AM.16      | 0              | 1                         | 0           | 0                              | 0               | 1                         | 0           | 0                              | 0                 | 2.50%                     | 0            | 0                              | CE22949 WBGene00022181 status:Partially_confirmed TR:Q9BL40 prot     | 0                     | 1                     |
| ZK484.2a        | 0              | 1                         | 0           | 0                              | 0               | 1                         | 0           | 0                              | 0                 | 2.10%                     | 0            | 0                              | CE27353 WBGene00001819 locus:haf-9 transporter protein status:Confir | 0                     | 1                     |
| ZK1151.1e       | 0              | 0                         | 0           | 1                              | 0               | 0                         | 0           | 1                              | 0                 | 0                         | 0            | 0.50%                          | CE36461 WBGene00006876 locus:vab-10 status:Partially_confirmed TR:   | 0                     | 1                     |
| ZK1151.1d       | 0              | 0                         | 0           | 1                              | 0               | 0                         | 0           | 1                              | 0                 | 0                         | 0            | 0.50%                          | CE36460 WBGene00006876 locus:vab-10 status:Partially_confirmed TR:   | 0                     | 1                     |
| ZK1151.1f       | 0              | 0                         | 0           | 1                              | 0               | 0                         | 0           | 1                              | 0                 | 0                         | 0            | 0.50%                          | CE36462 WBGene00006876 locus:vab-10 status:Partially_confirmed TR:   | 0                     | 1                     |
| ZK1151.1a       | 0              | 0                         | 0           | 1                              | 0               | 0                         | 0           | 1                              | 0                 | 0                         | 0            | 0.50%                          | CE35150 WBGene00006876 locus:vab-10 status:Confirmed TR:O18290       | 0                     | 1                     |
| ZK1151.1h       | 0              | 0                         | 0           | 1                              | 0               | 0                         | 0           | 1                              | 0                 | 0                         | 0            | 0.50%                          | CE39998 WBGene00006876 locus:vab-10 status:Partially_confirmed TR:   | 0                     | 1                     |
| C42D4.1         | 0              | 1                         | 0           | 0                              | 0               | 1                         | 0           | 0                              | 0                 | 6.80%                     | 0            | 0                              | CE04189 WBGene00016594 status:Confirmed TR:Q18577 protein_id:AA      | 0                     | 1                     |
| ZK512.1         | 0              | 1                         | 0           | 0                              | 0               | 1                         | 0           | 0                              | 0                 | 7.50%                     | 0            | 0                              | CE41494 WBGene00013982 status:Confirmed SW:P34639 protein_id:CA      | 0                     | 1                     |



|                   |   |   |   |   |   |   |   |   |   |        |        |   |         |                 |                                           |                                 |                     |               |   |   |
|-------------------|---|---|---|---|---|---|---|---|---|--------|--------|---|---------|-----------------|-------------------------------------------|---------------------------------|---------------------|---------------|---|---|
| F43G9.5           | 0 | 1 | 0 | 0 | 0 | 1 | 0 | 0 | 0 | 7.90%  | 0      | 0 | CE10362 | WBGene00009668  | status:Confirmed                          | TR:Q93716                       | protein_id:CA       | 0             | 1 |   |
| H28G03.4          | 0 | 1 | 0 | 0 | 0 | 1 | 0 | 0 | 0 | 3.10%  | 0      | 0 | CE11604 | WBGene00019252  | transposase                               | status:Predicted                | TR:Q97XP4           | 0             | 1 |   |
| T21D12.4          | 0 | 1 | 0 | 0 | 0 | 1 | 0 | 0 | 0 | 4.00%  | 0      | 0 | CE18268 | WBGene00003932  | locus:pat-6                               | status:Confirmed                | SW:O16785           | 0             | 1 |   |
| T24C12.3          | 0 | 0 | 0 | 1 | 0 | 0 | 0 | 1 | 0 | 0      | 2.20%  | 0 | CE31247 | WBGene000020765 | status:Partially_confirmed                | TR:Q22721                       | prot                | 0             | 1 |   |
| F55D10.2          | 0 | 1 | 0 | 0 | 0 | 1 | 0 | 0 | 0 | 8.80%  | 0      | 0 | CE02777 | WBGene00004438  | locus:rpl-25.1                            | Ribosomal protein L23           | status              | 0             | 1 |   |
| Y45F10D.12        | 0 | 0 | 0 | 1 | 0 | 0 | 0 | 1 | 0 | 0      | 9.00%  | 0 | CE16650 | WBGene00004430  | locus:rpl-18                              | Eukaryotic ribosomal protein L  |                     | 0             | 1 |   |
| F31D5.3c          | 0 | 0 | 0 | 1 | 0 | 0 | 0 | 1 | 0 | 0      | 7.00%  | 0 | CE31797 | WBGene00006495  | locus:tag-149                             | status:Partially_confirmed      | TR                  | 0             | 1 |   |
| F07B7.10          | 0 | 0 | 0 | 1 | 0 | 0 | 0 | 1 | 0 | 0      | 18.10% | 0 | CE04501 | WBGene00001925  | locus:his-51                              | status:Predicted                | SW:P09588           | 0             | 1 |   |
| ZK131.10          | 0 | 0 | 0 | 1 | 0 | 0 | 0 | 1 | 0 | 0      | 18.10% | 0 | CE04501 | WBGene00001890  | locus:his-16                              | histone H2A                     | status:Partially_co | 0             | 1 |   |
| F56A6.4           | 0 | 1 | 0 | 0 | 0 | 1 | 0 | 0 | 0 | 5.00%  | 0      | 0 | CE34319 | WBGene00018923  | status:Partially_confirmed                | TR:Q9GZG5                       | pro                 | 0             | 1 |   |
| Y74C10AR.1        | 0 | 1 | 0 | 0 | 0 | 1 | 0 | 0 | 0 | 3.40%  | 0      | 0 | CE30325 | WBGene00001232  | locus:eif-3.1                             | status:Partially_confirmed      | TR:Q                | 0             | 1 |   |
| Reverse_Y14H12B.2 | 0 | 0 | 0 | 1 | 0 | 0 | 0 | 1 | 0 | 0      | 1.70%  | 0 | CE21366 | WBGene00021192  | status:Confirmed                          | TR:Q97YP8                       | protein_id:AA       | 0             | 1 |   |
| F08G2.2           | 0 | 0 | 0 | 1 | 0 | 0 | 0 | 1 | 0 | 0      | 18.10% | 0 | CE04501 | WBGene00001917  | locus:his-43                              | Core histones H2A, H2B, H3 a    |                     | 0             | 1 |   |
| F17E9.13          | 0 | 0 | 0 | 1 | 0 | 0 | 0 | 1 | 0 | 0      | 18.10% | 0 | CE04501 | WBGene00001907  | locus:his-33                              | status:Predicted                | SW:P09588           | 0             | 1 |   |
| F39B2.4a          | 0 | 1 | 0 | 0 | 0 | 1 | 0 | 0 | 0 | 1.10%  | 0      | 0 | CE28023 | WBGene00006349  | locus:sur-2 SUR-2                         | PROTEIN                         | status:Confir       | 0             | 1 |   |
| F39B2.4b          | 0 | 1 | 0 | 0 | 0 | 1 | 0 | 0 | 0 | 1.10%  | 0      | 0 | CE28024 | WBGene00006349  | locus:sur-2                               | status:Confirmed                | SW:Q10669           | 0             | 1 |   |
| T23D8.6           | 0 | 0 | 0 | 1 | 0 | 0 | 0 | 1 | 0 | 0      | 18.10% | 0 | CE04501 | WBGene00001942  | locus:his-68                              | histone H2A                     | status:Confirmed    | 0             | 1 |   |
| Y48G8AL.8a        | 0 | 0 | 0 | 1 | 0 | 0 | 0 | 1 | 0 | 0      | 5.30%  | 0 | CE22195 | WBGene00004429  | locus:rpl-17                              | status:Confirmed                | TR:Q9BL19           | 0             | 1 |   |
| DY3.1             | 0 | 1 | 0 | 0 | 0 | 1 | 0 | 0 | 0 | 16.70% | 0      | 0 | CE15745 | WBGene00006574  | locus:tin-13                              | status:Confirmed                | SW:Q45319           | 0             | 1 |   |
| F52E1.7a          | 1 | 0 | 0 | 0 | 1 | 0 | 0 | 0 | 0 | 8.70%  | 0      | 0 | CE04635 | WBGene00002021  | locus:hsp-17                              | heat shock protein              | status:Con          | 1             | 0 |   |
| F52E1.7b          | 1 | 0 | 0 | 0 | 1 | 0 | 0 | 0 | 0 | 8.80%  | 0      | 0 | CE35323 | WBGene00002021  | locus:hsp-17                              | status:Confirmed                | TR:Q7JP52           | 1             | 0 |   |
| Y57G11C.10b       | 0 | 0 | 1 | 0 | 0 | 0 | 1 | 0 | 0 | 4.10%  | 0      | 0 | CE39445 | WBGene00001558  | locus:gdi-1                               | status:Partially_confirmed      | TR:Q                | 1             | 0 |   |
| Y57G11C.10a       | 0 | 0 | 1 | 0 | 0 | 0 | 1 | 0 | 0 | 4.30%  | 0      | 0 | CE14944 | WBGene00001558  | locus:gdi-1                               | GDI-1 GDP dissociation inhibito |                     | 1             | 0 |   |
| C46G7.4b          | 0 | 0 | 1 | 0 | 0 | 0 | 1 | 0 | 0 | 2.70%  | 0      | 0 | CE08781 | WBGene00004112  | locus:pqn-22                              | status:Partially_confirmed      | TR:                 | 1             | 0 |   |
| Y67D8C.10a        | 1 | 0 | 0 | 0 | 1 | 0 | 0 | 0 | 0 | 1.50%  | 0      | 0 | CE28372 | WBGene00003153  | locus:mca-3                               | status:Partially_confirmed      | TR:                 | 1             | 0 |   |
| Y67D8C.10b        | 1 | 0 | 0 | 0 | 1 | 0 | 0 | 0 | 0 | 1.40%  | 0      | 0 | CE28373 | WBGene00003153  | locus:mca-3                               | status:Partially_confirmed      | TR:                 | 1             | 0 |   |
| Y67D8C.10c        | 1 | 0 | 0 | 0 | 1 | 0 | 0 | 0 | 0 | 1.50%  | 0      | 0 | CE31664 | WBGene00003153  | locus:mca-3                               | status:Partially_confirmed      | TR:                 | 1             | 0 |   |
| F56F3.5           | 0 | 0 | 1 | 0 | 0 | 0 | 0 | 0 | 0 | 3.90%  | 0      | 0 | CE00664 | WBGene00004470  | locus:rps-1                               | Ribosomal protein S3a (human)   |                     | 1             | 0 |   |
| F56D2.1           | 1 | 0 | 0 | 0 | 1 | 0 | 0 | 0 | 0 | 3.40%  | 0      | 0 | CE11226 | WBGene00018963  | locus:ucr-1                               | Mitochondrial processing protea |                     | 1             | 0 |   |
| Y106G6H.3         | 1 | 0 | 0 | 0 | 1 | 0 | 0 | 0 | 0 | 8.00%  | 0      | 0 | CE20413 | WBGene00004444  | locus:rpl-30                              | status:Partially_confirmed      | TR:Q                | 1             | 0 |   |
| F25H5.3b          | 1 | 0 | 0 | 0 | 1 | 0 | 0 | 0 | 0 | 1.80%  | 0      | 0 | CE15899 | WBGene00009126  | Pyruvate kinase                           | status:Confirmed                | TR:O178             | 1             | 0 |   |
| F25H5.3a          | 1 | 0 | 0 | 0 | 1 | 0 | 0 | 0 | 0 | 2.00%  | 0      | 0 | CE15898 | WBGene00009126  | Pyruvate kinase                           | status:Confirmed                | TR:O178             | 1             | 0 |   |
| F25H5.3d          | 1 | 0 | 0 | 0 | 1 | 0 | 0 | 0 | 0 | 2.00%  | 0      | 0 | CE37832 | WBGene00009126  | Pyruvate kinase                           | status:Confirmed                | TR:Q351             | 1             | 0 |   |
| F25H5.3c          | 1 | 0 | 0 | 0 | 1 | 0 | 0 | 0 | 0 | 2.10%  | 0      | 0 | CE36135 | WBGene00009126  | status:Confirmed                          | TR:Q7JL40                       | protein_id:CA       | 1             | 0 |   |
| C02F5.9           | 1 | 0 | 0 | 0 | 1 | 0 | 0 | 0 | 0 | 5.40%  | 0      | 0 | CE26745 | WBGene00003952  | locus:pbs-6                               | Proteasome component C5         | sta                 | 1             | 0 |   |
| C06C3.7           | 1 | 0 | 0 | 0 | 1 | 0 | 0 | 0 | 0 | 13.30% | 0      | 0 | CE00888 | WBGene00007377  | status:Partially_confirmed                | TR:Q17714                       | prot                | 1             | 0 |   |
| F56D5.6           | 1 | 0 | 0 | 0 | 1 | 0 | 0 | 0 | 0 | 4.20%  | 0      | 0 | CE33797 | WBGene00010150  | status:Partially_confirmed                | TR:Q20881                       | prot                | 1             | 0 |   |
| Reverse_F40G9.5   | 1 | 0 | 0 | 0 | 1 | 0 | 0 | 0 | 0 | 1.80%  | 0      | 0 | CE19852 | WBGene00018241  | status:Partially_confirmed                | TR:Q9T272                       | prot                | 1             | 0 |   |
| F28A10.6          | 1 | 0 | 0 | 0 | 1 | 0 | 0 | 0 | 0 | 4.60%  | 0      | 0 | CE19411 | WBGene00017874  | acyl-coA dehydrogenase                    | status:Partially_co             |                     | 1             | 0 |   |
| ZK669.4           | 1 | 0 | 0 | 0 | 1 | 0 | 0 | 0 | 0 | 3.10%  | 0      | 0 | CE01115 | WBGene00014054  | lipamide acyltransferase                  | status:Confirmed                |                     | 1             | 0 |   |
| T28D9.10          | 0 | 0 | 1 | 0 | 0 | 0 | 1 | 0 | 0 | 0      | 15.90% | 0 | CE02065 | WBGene00004916  | locus:snr-3                               | small nuclear ribonucleoprotein |                     | 1             | 0 |   |
| F41C3.5           | 1 | 0 | 0 | 0 | 1 | 0 | 0 | 0 | 0 | 2.60%  | 0      | 0 | CE02733 | WBGene00018271  | Serine carboxypeptidase                   | status:Confirmed                |                     | 1             | 0 |   |
| T04H1.7           | 1 | 0 | 0 | 0 | 1 | 0 | 0 | 0 | 0 | 2.70%  | 0      | 0 | CE31984 | WBGene00011452  | locus:ugt-55                              | UDP-sugartransferase            | status:F            | 1             | 0 |   |
| Y53C10A.12        | 1 | 0 | 0 | 0 | 1 | 0 | 0 | 0 | 0 | 2.80%  | 0      | 0 | CE22380 | WBGene00002004  | locus:hsf-1                               | HSF-type DNA-binding domain     |                     | 1             | 0 |   |
| C42C1.2           | 1 | 0 | 0 | 0 | 1 | 0 | 0 | 0 | 0 | 4.90%  | 0      | 0 | CE36275 | WBGene00016580  | protein phosphatase                       | status:Partially_confir         |                     | 1             | 0 |   |
| T02H6.11          | 0 | 0 | 0 | 0 | 1 | 0 | 0 | 0 | 0 | 11.50% | 0      | 0 | CE21147 | WBGene00020181  | ubiquinol-cytochrome c reductase complex  |                                 |                     | 1             | 0 |   |
| R09E10.7          | 1 | 0 | 0 | 0 | 1 | 0 | 0 | 0 | 0 | 1.00%  | 0      | 0 | CE37845 | WBGene00004140  | locus:pqn-55                              | status:Partially_confirmed      | TR                  | 1             | 0 |   |
| B0403.4           | 1 | 0 | 0 | 0 | 1 | 0 | 0 | 0 | 0 | 4.10%  | 0      | 0 | CE03880 | WBGene00015168  | locus:tag-320                             | protein disulfide-isomerase st  |                     | 1             | 0 |   |
| W02F12.5          | 1 | 0 | 0 | 0 | 1 | 0 | 0 | 0 | 0 | 4.50%  | 0      | 0 | CE31083 | WBGene00020950  | dihydroliipoamide succinyltransferase     | status                          |                     | 1             | 0 |   |
| F37E3.3           | 1 | 0 | 0 | 0 | 1 | 0 | 0 | 0 | 0 | 5.00%  | 0      | 0 | CE09999 | WBGene00018158  | status:Partially_confirmed                | TR:O01765                       | prot                | 1             | 0 |   |
| T09A5.8           | 1 | 0 | 0 | 0 | 1 | 0 | 0 | 0 | 0 | 3.50%  | 0      | 0 | CE01089 | WBGene00011636  | chromosomal organisation modifier protein |                                 |                     | 1             | 0 |   |
| C06A1.1           | 1 | 0 | 0 | 0 | 1 | 0 | 0 | 0 | 0 | 1.90%  | 0      | 0 | CE02114 | WBGene00007352  | locus:cdc-48.1                            | transitional endoplasmic reti   |                     | 1             | 0 |   |
| C54G4.3           | 1 | 0 | 0 | 0 | 1 | 0 | 0 | 0 | 0 | 5.70%  | 0      | 0 | CE05509 | WBGene00008313  | status:Partially_confirmed                | TR:Q18848                       | prot                | 1             | 0 |   |
| W04B5.3c          | 0 | 0 | 1 | 0 | 0 | 0 | 1 | 0 | 0 | 4.20%  | 0      | 0 | CE32738 | WBGene00021020  | status:Confirmed                          | TR:Q8ITW2                       | protein_id:AA       | 1             | 0 |   |
| W04B5.3b          | 0 | 0 | 1 | 0 | 0 | 0 | 1 | 0 | 0 | 3.50%  | 0      | 0 | CE30200 | WBGene00021020  | status:Confirmed                          | TR:Q8WSM4                       | protein_id:A        | 1             | 0 |   |
| W04B5.3a          | 0 | 0 | 1 | 0 | 0 | 0 | 1 | 0 | 0 | 3.50%  | 0      | 0 | CE29362 | WBGene00021020  | status:Confirmed                          | TR:Q9UA61                       | protein_id:AA       | 1             | 0 |   |
| F59A2.3           | 1 | 0 | 0 | 0 | 1 | 0 | 0 | 0 | 0 | 4.70%  | 0      | 0 | CE17940 | WBGene00010303  | Splicing factor-associated 32K chain      | status                          |                     | 1             | 0 |   |
| F23F12.6          | 1 | 0 | 0 | 0 | 1 | 0 | 0 | 0 | 0 | 4.60%  | 0      | 0 | CE01253 | WBGene00004503  | locus:rpt-3                               | status:Confirmed                | SW:P46502           | pr            | 1 | 0 |
| C23G10.2a         | 0 | 0 | 1 | 0 | 0 | 0 | 1 | 0 | 0 | 0      | 13.50% | 0 | 0       | CE37747         | WBGene00016011                            | status:Confirmed                | SW:Q10121           | protein_id:AA | 1 | 0 |
| C23G10.2c         | 0 | 0 | 1 | 0 | 0 | 0 | 1 | 0 | 0 | 0      | 16.80% | 0 | 0       | CE37748         | WBGene00016011                            | status:Confirmed                | SW:Q10121           | protein_id:AA | 1 | 0 |
| C23G10.2b         | 0 | 0 | 1 | 0 | 0 | 0 | 1 | 0 | 0 | 0      | 16.00% | 0 | 0       | CE30613         | WBGene00016011                            | status:Confirmed                | SW:Q10121           | protein_id:AA | 1 | 0 |
| Y67D2.6           | 1 | 0 | 0 | 0 | 1 | 0 | 0 | 0 | 0 | 1.20%  | 0      | 0 | CE27311 | WBGene00022056  | status:Partially_confirmed                | SW:Q9BKQ8                       | prc                 | 1             | 0 |   |
| F29F11.6          | 0 | 0 | 1 | 0 | 0 | 0 | 1 | 0 | 0 | 5.20%  | 0      | 0 | CE20735 | WBGene00001747  | locus:gsp-1                               | serine/threonine protein phosph |                     | 1             | 0 |   |

|            |   |   |   |   |   |   |   |   |        |        |   |                                                                    |   |   |
|------------|---|---|---|---|---|---|---|---|--------|--------|---|--------------------------------------------------------------------|---|---|
| F23B12.5   | 0 | 0 | 1 | 0 | 0 | 0 | 1 | 0 | 0      | 2.40%  | 0 | CE09597 WBGene00009082 dihydropyrimidinase                         | 1 | 0 |
| R05D3.7    | 1 | 0 | 0 | 0 | 1 | 0 | 0 | 0 | 2.00%  | 0      | 0 | CE26945 WBGene00006840 locus:unc-116 Kinesin heavy chain           | 1 | 0 |
| T05E11.1   | 0 | 0 | 1 | 0 | 0 | 0 | 1 | 0 | 0      | 9.50%  | 0 | CE06360 WBGene00004474 locus:rps-5 40S ribosomal protein S5        | 1 | 0 |
| C09B8.6b   | 1 | 0 | 0 | 0 | 1 | 0 | 0 | 0 | 6.80%  | 0      | 0 | CE33558 WBGene00002023 locus:hsp-25 status:Confirmed TR:Q86GU1     | 1 | 0 |
| C09B8.6a   | 1 | 0 | 0 | 0 | 1 | 0 | 0 | 0 | 6.40%  | 0      | 0 | CE02466 WBGene00002023 locus:hsp-25 Small heat shock protein       | 1 | 0 |
| C39F7.4    | 0 | 0 | 1 | 0 | 0 | 0 | 1 | 0 | 0      | 9.30%  | 0 | CE16905 WBGene00004266 locus:rab-1 RAS-related protein             | 1 | 0 |
| C06E7.3a   | 1 | 0 | 0 | 0 | 1 | 0 | 0 | 0 | 2.50%  | 0      | 0 | CE03959 WBGene00015540 S-adenosylmethionine synthetase             | 1 | 0 |
| C06E7.3b   | 1 | 0 | 0 | 0 | 1 | 0 | 0 | 0 | 2.80%  | 0      | 0 | CE33517 WBGene00015540 status:Partially_confirmed TR:Q86NI4        | 1 | 0 |
| C06E7.1a   | 1 | 0 | 0 | 0 | 1 | 0 | 0 | 0 | 2.50%  | 0      | 0 | CE03957 WBGene00015538 S-adenosylmethionine synthetase             | 1 | 0 |
| C06E7.1d   | 1 | 0 | 0 | 0 | 1 | 0 | 0 | 0 | 5.80%  | 0      | 0 | CE33515 WBGene00015538 status:Confirmed TR:Q86NI3                  | 1 | 0 |
| Y80D3A.7   | 1 | 0 | 0 | 0 | 1 | 0 | 0 | 0 | 2.40%  | 0      | 0 | CE23110 WBGene00004236 locus:ptr-22 status:Predicted TR:Q9U1R3     | 1 | 0 |
| F55G1.13   | 1 | 0 | 0 | 0 | 1 | 0 | 0 | 0 | 2.80%  | 0      | 0 | CE07289 WBGene00018906 status:Partially_confirmed TR:Q20852        | 1 | 0 |
| C07G1.5    | 1 | 0 | 0 | 0 | 1 | 0 | 0 | 0 | 1.50%  | 0      | 0 | CE32574 WBGene00004101 locus:hgrs-1 status:Confirmed TR:Q17796     | 1 | 0 |
| F47B10.1   | 1 | 0 | 0 | 0 | 1 | 0 | 0 | 0 | 2.10%  | 0      | 0 | CE03351 WBGene00009812 succinate-CoA ligase                        | 1 | 0 |
| F49C12.3   | 0 | 0 | 1 | 0 | 0 | 0 | 1 | 0 | 0      | 3.70%  | 0 | CE40764 WBGene00009873 status:Predicted TR:Q20581                  | 1 | 0 |
| F57B9.6a   | 1 | 0 | 0 | 0 | 1 | 0 | 0 | 0 | 2.50%  | 0      | 0 | CE01341 WBGene00002083 locus:inf-1 status:Confirmed SW:P27639      | 1 | 0 |
| F57B9.6b   | 1 | 0 | 0 | 0 | 1 | 0 | 0 | 0 | 8.70%  | 0      | 0 | CE38524 WBGene00002083 locus:inf-1 status:Confirmed SW:P27639      | 1 | 0 |
| F45G2.4    | 1 | 0 | 0 | 0 | 1 | 0 | 0 | 0 | 4.10%  | 0      | 0 | CE16047 WBGene00009732 status:Confirmed SW:O62246                  | 1 | 0 |
| C18C4.10a  | 1 | 0 | 0 | 0 | 1 | 0 | 0 | 0 | 2.50%  | 0      | 0 | CE27362 WBGene00002215 locus:klc-2 kinesin light chain             | 1 | 0 |
| C18C4.10d  | 1 | 0 | 0 | 0 | 1 | 0 | 0 | 0 | 2.40%  | 0      | 0 | CE36917 WBGene00002215 locus:klc-2 status:Confirmed SW:P46822      | 1 | 0 |
| C18C4.10c  | 1 | 0 | 0 | 0 | 1 | 0 | 0 | 0 | 2.60%  | 0      | 0 | CE32803 WBGene00002215 locus:klc-2 status:Confirmed SW:P46822      | 1 | 0 |
| C18C4.10b  | 1 | 0 | 0 | 0 | 1 | 0 | 0 | 0 | 2.40%  | 0      | 0 | CE32802 WBGene00002215 locus:klc-2 status:Confirmed SW:P46822      | 1 | 0 |
| F56E10.4   | 1 | 0 | 0 | 0 | 1 | 0 | 0 | 0 | 9.60%  | 0      | 0 | CE19904 WBGene00004496 locus:rps-27 ribosomal protein              | 1 | 0 |
| ZK1248.7   | 0 | 0 | 1 | 0 | 0 | 0 | 1 | 0 | 0      | 6.10%  | 0 | CE02907 WBGene00022877 status:Predicted TR:Q23415                  | 1 | 0 |
| C41C4.8    | 1 | 0 | 0 | 0 | 1 | 0 | 0 | 0 | 1.90%  | 0      | 0 | CE05402 WBGene00008053 locus:cdc-48.2 P97 protein                  | 1 | 0 |
| T27E9.1a   | 1 | 0 | 0 | 0 | 1 | 0 | 0 | 0 | 2.70%  | 0      | 0 | CE14263 WBGene00006439 locus:tag-61 ADP/ATP carrier                | 1 | 0 |
| T27E9.1b   | 1 | 0 | 0 | 0 | 1 | 0 | 0 | 0 | 6.20%  | 0      | 0 | CE33843 WBGene00006439 locus:tag-61 status:Confirmed TR:Q86CZ9     | 1 | 0 |
| T27E9.1c   | 1 | 0 | 0 | 0 | 1 | 0 | 0 | 0 | 3.90%  | 0      | 0 | CE33844 WBGene00006439 locus:tag-61 status:Confirmed TR:Q86CZ8     | 1 | 0 |
| F01G10.1   | 1 | 0 | 0 | 0 | 1 | 0 | 0 | 0 | 2.90%  | 0      | 0 | CE09163 WBGene00008506 transketolase                               | 1 | 0 |
| W04D2.1a   | 1 | 0 | 0 | 0 | 1 | 0 | 0 | 0 | 1.70%  | 0      | 0 | CE06539 WBGene00000228 locus:atn-1 alpha-actinin                   | 1 | 0 |
| W04D2.1b   | 1 | 0 | 0 | 0 | 1 | 0 | 0 | 0 | 1.80%  | 0      | 0 | CE21256 WBGene00000228 locus:atn-1 status:Confirmed TR:Q9XVU8      | 1 | 0 |
| C12C8.3b   | 1 | 0 | 0 | 0 | 1 | 0 | 0 | 0 | 1.10%  | 0      | 0 | CE27063 WBGene00003026 locus:lin-41 status:Partially_confirmed     | 1 | 0 |
| C12C8.3a   | 1 | 0 | 0 | 0 | 1 | 0 | 0 | 0 | 1.10%  | 0      | 0 | CE27062 WBGene00003026 locus:lin-41 status:Confirmed SW:Q9U489     | 1 | 0 |
| K04G7.10   | 1 | 0 | 0 | 0 | 1 | 0 | 0 | 0 | 8.70%  | 0      | 0 | CE30443 WBGene00004390 locus:rnp-7 SN-RNP U1                       | 1 | 0 |
| F46E10.10a | 1 | 0 | 0 | 0 | 1 | 0 | 0 | 0 | 5.10%  | 0      | 0 | CE20820 WBGene00018491 lactate dehydrogenase                       | 1 | 0 |
| F46E10.10b | 1 | 0 | 0 | 0 | 1 | 0 | 0 | 0 | 6.20%  | 0      | 0 | CE33096 WBGene00018491 status:Confirmed TR:Q8IA49                  | 1 | 0 |
| F40F4.5    | 0 | 0 | 1 | 0 | 0 | 0 | 1 | 0 | 0      | 4.60%  | 0 | CE30131 WBGene00006535 locus:tba-9 tubulin beta chain              | 1 | 0 |
| H28O16.1b  | 1 | 0 | 0 | 0 | 1 | 0 | 0 | 0 | 10.30% | 0      | 0 | CE34194 WBGene00010419 status:Confirmed SW:Q9XXK1                  | 1 | 0 |
| Y71F9B.4   | 1 | 0 | 0 | 0 | 1 | 0 | 0 | 0 | 16.90% | 0      | 0 | CE22871 WBGene00004920 locus:snr-7 small nuclear ribonucleoprotein | 1 | 0 |
| F21H12.6   | 1 | 0 | 0 | 0 | 1 | 0 | 0 | 0 | 0.70%  | 0      | 0 | CE01917 WBGene00017686 Tripeptidyl-peptidase II                    | 1 | 0 |
| B0303.3    | 1 | 0 | 0 | 0 | 1 | 0 | 0 | 0 | 2.50%  | 0      | 0 | CE00561 WBGene00015125 Acetyl-coa acetyltransferase                | 1 | 0 |
| T21B10.2a  | 1 | 0 | 0 | 0 | 1 | 0 | 0 | 0 | 3.50%  | 0      | 0 | CE03684 WBGene00011884 locus:enol-1 enolase                        | 1 | 0 |
| T21B10.2c  | 1 | 0 | 0 | 0 | 1 | 0 | 0 | 0 | 3.20%  | 0      | 0 | CE36954 WBGene00011884 locus:enol-1 status:Confirmed SW:Q27527     | 1 | 0 |
| T21B10.2b  | 1 | 0 | 0 | 0 | 1 | 0 | 0 | 0 | 4.50%  | 0      | 0 | CE32730 WBGene00011884 locus:enol-1 status:Confirmed SW:Q27527     | 1 | 0 |
| F57A8.2a   | 1 | 0 | 0 | 0 | 1 | 0 | 0 | 0 | 3.40%  | 0      | 0 | CE31547 WBGene00010178 status:Confirmed TR:Q20913                  | 1 | 0 |
| F57A8.2b   | 1 | 0 | 0 | 0 | 1 | 0 | 0 | 0 | 3.20%  | 0      | 0 | CE39508 WBGene00010178 status:Confirmed TR:Q2PJ77                  | 1 | 0 |
| ZK892.1b   | 1 | 0 | 0 | 0 | 1 | 0 | 0 | 0 | 6.70%  | 0      | 0 | CE18468 WBGene00002266 locus:lec-3 galactoside-binding lectin      | 1 | 0 |
| ZK892.1a   | 1 | 0 | 0 | 0 | 1 | 0 | 0 | 0 | 6.40%  | 0      | 0 | CE24743 WBGene00002266 locus:lec-3 galactoside-binding lectin      | 1 | 0 |
| F09C8.2    | 1 | 0 | 0 | 0 | 1 | 0 | 0 | 0 | 1.30%  | 0      | 0 | CE03178 WBGene00008622 status:Confirmed TR:O01299                  | 1 | 0 |
| C36B1.4    | 1 | 0 | 0 | 0 | 1 | 0 | 0 | 0 | 5.50%  | 0      | 0 | CE05371 WBGene00003925 locus:pas-4 proteasome A-type               | 1 | 0 |
| Y22D7AL.5  | 0 | 0 | 1 | 0 | 0 | 0 | 1 | 0 | 0      | 3.00%  | 0 | CE27244 WBGene00002025 locus:hsp-60 status:Confirmed SW:P50140     | 1 | 0 |
| F25H2.11   | 1 | 0 | 0 | 0 | 1 | 0 | 0 | 0 | 5.50%  | 0      | 0 | CE09656 WBGene00009122 locus:tct-1 TCTP protein                    | 1 | 0 |
| ZK892.1d   | 1 | 0 | 0 | 0 | 1 | 0 | 0 | 0 | 6.10%  | 0      | 0 | CE32782 WBGene00002266 locus:lec-3 status:Confirmed TR:Q8IA4A      | 1 | 0 |
| ZK892.1c   | 1 | 0 | 0 | 0 | 1 | 0 | 0 | 0 | 8.60%  | 0      | 0 | CE32781 WBGene00002266 locus:lec-3 status:Confirmed TR:Q8IA45      | 1 | 0 |
| Y38A10A.5  | 1 | 0 | 0 | 0 | 1 | 0 | 0 | 0 | 5.30%  | 0      | 0 | CE21562 WBGene00000802 locus:crt-1 calreticulin precursor          | 1 | 0 |
| C15B12.5b  | 1 | 0 | 0 | 0 | 1 | 0 | 0 | 0 | 2.80%  | 0      | 0 | CE29667 WBGene00001517 locus:gar-1 status:Confirmed SW:Q18007      | 1 | 0 |
| C15B12.5a  | 1 | 0 | 0 | 0 | 1 | 0 | 0 | 0 | 2.90%  | 0      | 0 | CE29666 WBGene00001517 locus:gar-1 Muscarinic acetylcholine        | 1 | 0 |
| R186.7     | 1 | 0 | 0 | 0 | 1 | 0 | 0 | 0 | 3.60%  | 0      | 0 | CE27772 WBGene00011308 status:Confirmed TR:Q95ZQ5                  | 1 | 0 |
| C15B12.5c  | 1 | 0 | 0 | 0 | 1 | 0 | 0 | 0 | 3.20%  | 0      | 0 | CE29668 WBGene00001517 locus:gar-1 status:Confirmed SW:Q18007      | 1 | 0 |
| F46A9.5    | 0 | 0 | 1 | 0 | 0 | 0 | 1 | 0 | 0      | 10.80% | 0 | CE10580 WBGene00004807 locus:skr-1 cyclin AVCDK2-associated        | 1 | 0 |
| ZK593.1    | 1 | 0 | 0 | 0 | 1 | 0 | 0 | 0 | 2.10%  | 0      | 0 | CE24731 WBGene00014001 pyruvate kinase                             | 1 | 0 |
| R01H10.3a  | 1 | 0 | 0 | 0 | 1 | 0 | 0 | 0 | 2.50%  | 0      | 0 | CE00590 WBGene00000768 locus:cor-1 Coronin (beta transducin)       | 1 | 0 |
| R01H10.3b  | 1 | 0 | 0 | 0 | 1 | 0 | 0 | 0 | 2.80%  | 0      | 0 | CE30350 WBGene00000768 locus:cor-1 Coronin (beta transducin)       | 1 | 0 |

|                 |   |   |   |   |   |   |   |   |        |       |   |   |         |                |                                                                         |   |   |
|-----------------|---|---|---|---|---|---|---|---|--------|-------|---|---|---------|----------------|-------------------------------------------------------------------------|---|---|
| R01H10.3c       | 1 | 0 | 0 | 0 | 0 | 0 | 0 | 0 | 2.50%  | 0     | 0 | 0 | CE30351 | WBGene00000768 | locus:cor-1 Coronin (beta transducin) status:Confirmed                  | 1 | 0 |
| R01H10.3d       | 1 | 0 | 0 | 0 | 0 | 1 | 0 | 0 | 3.00%  | 0     | 0 | 0 | CE30352 | WBGene00000768 | locus:cor-1 Coronin (beta transducin) status:Confirmed                  | 1 | 0 |
| T05C3.5         | 1 | 0 | 0 | 0 | 0 | 1 | 0 | 0 | 4.30%  | 0     | 0 | 0 | CE13229 | WBGene00001037 | locus:dj-19 DNAJ-like protein status:Confirmed                          | 1 | 0 |
| F59B8.2         | 1 | 0 | 0 | 0 | 0 | 1 | 0 | 0 | 2.90%  | 0     | 0 | 0 | CE03436 | WBGene00010317 | isocitrate dehydrogenase status:Confirmed                               | 1 | 0 |
| F40E10.3        | 1 | 0 | 0 | 0 | 0 | 1 | 0 | 0 | 2.60%  | 0     | 0 | 0 | CE05839 | WBGene00000822 | locus:csq-1 calsequestrin like status:Confirmed                         | 1 | 0 |
| ZC518.2         | 1 | 0 | 0 | 0 | 0 | 1 | 0 | 0 | 1.20%  | 0     | 0 | 0 | CE32286 | WBGene00004756 | locus:sec-24.2 Yeast YIK9 like status:Partially_confirmed               | 1 | 0 |
| H43107.2        | 1 | 0 | 0 | 0 | 0 | 1 | 0 | 0 | 3.60%  | 0     | 0 | 0 | CE29979 | WBGene00019275 | transferase status:Confirmed TR:Q9UAY9 protein_id:AA01111               | 1 | 0 |
| ZK652.4         | 1 | 0 | 0 | 0 | 0 | 1 | 0 | 0 | 8.10%  | 0     | 0 | 0 | CE00450 | WBGene00004449 | locus:rpl-35 60S ribosomal protein L35 status:Confirmed                 | 1 | 0 |
| B0393.1         | 1 | 0 | 0 | 0 | 0 | 1 | 0 | 0 | 5.80%  | 0     | 0 | 0 | CE00854 | WBGene00004469 | locus:rps-0 40S ribosomal protein status:Confirmed                      | 1 | 0 |
| C17H12.3        | 1 | 0 | 0 | 0 | 0 | 1 | 0 | 0 | 2.90%  | 0     | 0 | 0 | CE16864 | WBGene00015929 | protein-tyrosine phosphatase status:Partially_confirmed                 | 1 | 0 |
| T08D2.1         | 1 | 0 | 0 | 0 | 0 | 1 | 0 | 0 | 10.20% | 0     | 0 | 0 | CE21168 | WBGene00011606 | emp24/vgp25Lv24 family status:Predicted                                 | 1 | 0 |
| Y41E3.11        | 1 | 0 | 0 | 0 | 0 | 1 | 0 | 0 | 0.90%  | 0     | 0 | 0 | CE18379 | WBGene00012769 | status:Partially_confirmed TR:Q9U2H8 protein_id:AA01111                 | 1 | 0 |
| F58H1.2         | 1 | 0 | 0 | 0 | 0 | 1 | 0 | 0 | 7.40%  | 0     | 0 | 0 | CE06026 | WBGene00010285 | status:Partially_confirmed TR:Q21011 protein_id:AA01111                 | 1 | 0 |
| C05E4.9b        | 1 | 0 | 0 | 0 | 0 | 1 | 0 | 0 | 1.60%  | 0     | 0 | 0 | CE32565 | WBGene00001564 | locus:gei-7 status:Confirmed TR:Q8IA71 protein_id:AA01111               | 1 | 0 |
| C06H2.1         | 1 | 0 | 0 | 0 | 0 | 1 | 0 | 0 | 9.40%  | 0     | 0 | 0 | CE15602 | WBGene00007385 | locus:atp-5 ATP synthase D chain status:Confirmed                       | 1 | 0 |
| F21G4.6         | 1 | 0 | 0 | 0 | 0 | 1 | 0 | 0 | 0.70%  | 0     | 0 | 0 | CE37360 | WBGene00009027 | status:Partially_confirmed TR:Q93547 protein_id:AA01111                 | 1 | 0 |
| ZK418.9b        | 1 | 0 | 0 | 0 | 0 | 1 | 0 | 0 | 3.10%  | 0     | 0 | 0 | CE34457 | WBGene00022738 | status:Confirmed TR:Q7Z145 protein_id:AA01111                           | 1 | 0 |
| ZK418.9a        | 1 | 0 | 0 | 0 | 0 | 1 | 0 | 0 | 2.90%  | 0     | 0 | 0 | CE28190 | WBGene00022738 | possible RNA binding protein status:Confirmed                           | 1 | 0 |
| ZK721.2         | 1 | 0 | 0 | 0 | 0 | 1 | 0 | 0 | 4.10%  | 0     | 0 | 0 | CE40008 | WBGene00006764 | locus:unc-27 troponin I status:Confirmed                                | 1 | 0 |
| Y45G12B.1c      | 1 | 0 | 0 | 0 | 0 | 1 | 0 | 0 | 2.70%  | 0     | 0 | 0 | CE33341 | WBGene00021562 | locus:nuo-5 status:Partially_confirmed TR:Q9U1R8 protein_id:AA01111     | 1 | 0 |
| Y45G12B.1a      | 1 | 0 | 0 | 0 | 0 | 1 | 0 | 0 | 2.30%  | 0     | 0 | 0 | CE21933 | WBGene00021562 | locus:nuo-5 NADH-ubiquinone reductase status:Confirmed                  | 1 | 0 |
| R13A5.3         | 1 | 0 | 0 | 0 | 0 | 1 | 0 | 0 | 8.60%  | 0     | 0 | 0 | CE01375 | WBGene00020047 | status:Partially_confirmed TR:Q95Y92 protein_id:AA01111                 | 1 | 0 |
| C49F5.1         | 1 | 0 | 0 | 0 | 0 | 1 | 0 | 0 | 2.50%  | 0     | 0 | 0 | CE08852 | WBGene00008205 | locus:sams-1 s-adenosylmethionine synthetase status:Confirmed           | 1 | 0 |
| F16D3.1         | 0 | 0 | 1 | 0 | 0 | 0 | 1 | 0 | 0      | 4.70% | 0 | 0 | CE09434 | WBGene00006531 | locus:tba-5 tubulin status:Partially_confirmed                          | 1 | 0 |
| F58D5.7         | 1 | 0 | 0 | 0 | 0 | 1 | 0 | 0 | 5.40%  | 0     | 0 | 0 | CE25024 | WBGene00010246 | status:Confirmed TR:Q9NLC7 protein_id:AA01111                           | 1 | 0 |
| Y79H2A.3a       | 1 | 0 | 0 | 0 | 0 | 1 | 0 | 0 | 0.80%  | 0     | 0 | 0 | CE23092 | WBGene00013580 | status:Partially_confirmed TR:Q9U1R8 protein_id:AA01111                 | 1 | 0 |
| R12H7.2         | 1 | 0 | 0 | 0 | 0 | 1 | 0 | 0 | 2.50%  | 0     | 0 | 0 | CE03567 | WBGene00000217 | locus:asp-4 aspartyl protease status:Confirmed                          | 1 | 0 |
| T28C6.9         | 1 | 0 | 0 | 0 | 0 | 1 | 0 | 0 | 0.80%  | 0     | 0 | 0 | CE40137 | WBGene00044793 | status:Partially_confirmed TR:Q1N230 protein_id:AA01111                 | 1 | 0 |
| F32H2.5         | 1 | 0 | 0 | 0 | 0 | 1 | 0 | 0 | 0.60%  | 0     | 0 | 0 | CE09880 | WBGene00009342 | locus:fasn-1 fatty acid synthase status:Partially_confirmed             | 1 | 0 |
| F32H2.9         | 1 | 0 | 0 | 0 | 0 | 1 | 0 | 0 | 1.90%  | 0     | 0 | 0 | CE34484 | WBGene00006532 | locus:tba-6 tubulin alpha chain status:Confirmed                        | 1 | 0 |
| W01A11.4        | 1 | 0 | 0 | 0 | 0 | 1 | 0 | 0 | 6.20%  | 0     | 0 | 0 | CE14396 | WBGene00002273 | locus:lec-10 galactin (S-lectin) status:Confirmed                       | 1 | 0 |
| C55B7.4b        | 0 | 0 | 1 | 0 | 0 | 0 | 1 | 0 | 0      | 9.50% | 0 | 0 | CE32840 | WBGene00016943 | locus:acdh-1 status:Confirmed TR:Q8IAB6 protein_id:AA01111              | 1 | 0 |
| C49H3.5b        | 1 | 0 | 0 | 0 | 0 | 1 | 0 | 0 | 2.60%  | 0     | 0 | 0 | CE30505 | WBGene00003827 | locus:ntl-4 status:Partially_confirmed TR:Q9U1R8 protein_id:AA01111     | 1 | 0 |
| C49H3.5a        | 1 | 0 | 0 | 0 | 0 | 1 | 0 | 0 | 2.00%  | 0     | 0 | 0 | CE27872 | WBGene00003827 | locus:ntl-4 zinc-finger transcription regulator status:Confirmed        | 1 | 0 |
| B0041.4         | 0 | 0 | 1 | 0 | 0 | 0 | 1 | 0 | 0      | 4.30% | 0 | 0 | CE07669 | WBGene00004415 | locus:rpl-4 ribosomal protein L1 status:Confirmed                       | 1 | 0 |
| Y38A8.2         | 1 | 0 | 0 | 0 | 0 | 1 | 0 | 0 | 7.40%  | 0     | 0 | 0 | CE07571 | WBGene00003949 | locus:pbs-3 Peptidase status:Confirmed                                  | 1 | 0 |
| Y73B3A.18b      | 0 | 0 | 1 | 0 | 0 | 0 | 1 | 0 | 0      | 5.50% | 0 | 0 | CE31261 | WBGene00022219 | status:Partially_confirmed TR:Q8MXR8 protein_id:AA01111                 | 1 | 0 |
| Y73B3A.18a      | 0 | 0 | 1 | 0 | 0 | 0 | 1 | 0 | 0      | 4.70% | 0 | 0 | CE27328 | WBGene00022219 | status:Partially_confirmed TR:Q95XE4 protein_id:AA01111                 | 1 | 0 |
| T13A10.11a      | 1 | 0 | 0 | 0 | 0 | 1 | 0 | 0 | 2.50%  | 0     | 0 | 0 | CE30175 | WBGene00006416 | locus:tag-32 S-adenosylmethionine synthetase status:Confirmed           | 1 | 0 |
| T13A10.11b      | 1 | 0 | 0 | 0 | 0 | 1 | 0 | 0 | 2.80%  | 0     | 0 | 0 | CE31726 | WBGene00006416 | locus:tag-32 status:Confirmed SW:Q27522 protein_id:AA01111              | 1 | 0 |
| Reverse_B0238.1 | 0 | 0 | 1 | 0 | 0 | 0 | 1 | 0 | 0      | 3.10% | 0 | 0 | CE07691 | WBGene00015067 | carboxylesterase status:Partially_confirmed                             | 1 | 0 |
| M01F1.2         | 1 | 0 | 0 | 0 | 0 | 1 | 0 | 0 | 4.00%  | 0     | 0 | 0 | CE01030 | WBGene00004428 | locus:rpl-16 L13P family ribosomal protein status:Confirmed             | 1 | 0 |
| F25G6.2         | 1 | 0 | 0 | 0 | 0 | 1 | 0 | 0 | 1.40%  | 0     | 0 | 0 | CE30764 | WBGene00017797 | status:Partially_confirmed TR:O16929 protein_id:AA01111                 | 1 | 0 |
| F49E10.5        | 1 | 0 | 0 | 0 | 0 | 1 | 0 | 0 | 1.40%  | 0     | 0 | 0 | CE29966 | WBGene00006424 | locus:ctbp-1 dehydrogenase status:Partially_confirmed                   | 1 | 0 |
| W09C2.3a        | 1 | 0 | 0 | 0 | 0 | 1 | 0 | 0 | 1.40%  | 0     | 0 | 0 | CE32951 | WBGene00003151 | locus:mca-1 calcium ATPase, isoform a status:Confirmed                  | 1 | 0 |
| W09C2.3b        | 1 | 0 | 0 | 0 | 0 | 1 | 0 | 0 | 1.40%  | 0     | 0 | 0 | CE25154 | WBGene00003151 | locus:mca-1 calcium ATPase, isoform b status:Confirmed                  | 1 | 0 |
| W09C2.3c        | 1 | 0 | 0 | 0 | 0 | 1 | 0 | 0 | 1.40%  | 0     | 0 | 0 | CE03800 | WBGene00003151 | locus:mca-1 calcium ATPase, isoform c status:Confirmed                  | 1 | 0 |
| T05F1.3         | 1 | 0 | 0 | 0 | 0 | 1 | 0 | 0 | 8.90%  | 0     | 0 | 0 | CE13265 | WBGene00004488 | locus:rps-19 Ribosomal protein S19e status:Confirmed                    | 1 | 0 |
| C10G6.1b        | 1 | 0 | 0 | 0 | 0 | 1 | 0 | 0 | 2.60%  | 0     | 0 | 0 | CE37193 | WBGene00015680 | status:Partially_confirmed TR:Q65ZH5 protein_id:AA01111                 | 1 | 0 |
| C10G6.1a        | 1 | 0 | 0 | 0 | 0 | 1 | 0 | 0 | 2.60%  | 0     | 0 | 0 | CE27677 | WBGene00015680 | status:Partially_confirmed TR:Q17902 protein_id:AA01111                 | 1 | 0 |
| F15A4.8a        | 1 | 0 | 0 | 0 | 0 | 1 | 0 | 0 | 1.50%  | 0     | 0 | 0 | CE15845 | WBGene00008842 | chitinase status:Partially_confirmed TR:O11111 protein_id:AA01111       | 1 | 0 |
| F15A4.8b        | 1 | 0 | 0 | 0 | 0 | 1 | 0 | 0 | 1.40%  | 0     | 0 | 0 | CE32863 | WBGene00008842 | status:Partially_confirmed TR:Q8I123 protein_id:AA01111                 | 1 | 0 |
| T13C2.6b        | 1 | 0 | 0 | 0 | 0 | 1 | 0 | 0 | 1.40%  | 0     | 0 | 0 | CE36568 | WBGene00020481 | status:Confirmed TR:Q7JP80 protein_id:AA01111                           | 1 | 0 |
| T13C2.6a        | 1 | 0 | 0 | 0 | 0 | 1 | 0 | 0 | 1.40%  | 0     | 0 | 0 | CE36567 | WBGene00020481 | status:Confirmed TR:Q7JP81 protein_id:AA01111                           | 1 | 0 |
| C10F3.5b        | 1 | 0 | 0 | 0 | 0 | 1 | 0 | 0 | 6.40%  | 0     | 0 | 0 | CE41195 | WBGene00003954 | locus:pcm-1 status:Confirmed                                            | 1 | 0 |
| C10F3.5a        | 1 | 0 | 0 | 0 | 0 | 1 | 0 | 0 | 6.20%  | 0     | 0 | 0 | CE08070 | WBGene00003954 | locus:pcm-1 L-isoaspartyl/D-aspartyl methyltransferase status:Confirmed | 1 | 0 |
| C05G5.4         | 1 | 0 | 0 | 0 | 0 | 1 | 0 | 0 | 3.70%  | 0     | 0 | 0 | CE05227 | WBGene00007350 | succinyl-CoA synthetase status:Confirmed                                | 1 | 0 |
| Y60A3A.9        | 1 | 0 | 0 | 0 | 0 | 1 | 0 | 0 | 8.10%  | 0     | 0 | 0 | CE24533 | WBGene00013360 | status:Confirmed TR:Q9U1Z4 protein_id:CA01111                           | 1 | 0 |
| Y105E8A.16      | 1 | 0 | 0 | 0 | 0 | 1 | 0 | 0 | 14.50% | 0     | 0 | 0 | CE29835 | WBGene00004489 | locus:rps-20 status:Confirmed TR:Q8WQA6 protein_id:AA01111              | 1 | 0 |
| F55B11.4        | 1 | 0 | 0 | 0 | 0 | 1 | 0 | 0 | 13.10% | 0     | 0 | 0 | CE16119 | WBGene00010086 | status:Confirmed TR:O17890 protein_id:CA01111                           | 1 | 0 |
| Y18D10A.1       | 1 | 0 | 0 | 0 | 0 | 1 | 0 | 0 | 1.00%  | 0     | 0 | 0 | CE21397 | WBGene00012474 | status:Partially_confirmed TR:Q9XW25 protein_id:AA01111                 | 1 | 0 |
| F08G2.7         | 1 | 0 | 0 | 0 | 0 | 1 | 0 | 0 | 3.20%  | 0     | 0 | 0 | CE19779 | WBGene00008578 | status:Partially_confirmed TR:Q9XVA2 protein_id:AA01111                 | 1 | 0 |
| Y38F1A.1        | 1 | 0 | 0 | 0 | 0 | 1 | 0 | 0 | 4.80%  | 0     | 0 | 0 | CE32962 | WBGene00012605 | status:Confirmed TR:Q9XWMS protein_id:CA01111                           | 1 | 0 |

|            |   |   |   |   |   |   |   |   |   |        |        |        |   |                                                                      |   |   |
|------------|---|---|---|---|---|---|---|---|---|--------|--------|--------|---|----------------------------------------------------------------------|---|---|
| T07A9.11   | 1 | 0 | 0 | 0 | 0 | 1 | 0 | 0 | 0 | 10.70% | 0      | 0      | 0 | CE40119 WBGene00004493 locus:rps-24 ribosomal protein status:Confir  | 1 | 0 |
| M02F4.8    | 1 | 0 | 0 | 0 | 0 | 1 | 0 | 0 | 0 | 5.20%  | 0      | 0      | 0 | CE34058 WBGene00000175 locus:aqp-7 MIP family protein status:Confir  | 1 | 0 |
| T25F10.6a  | 1 | 0 | 0 | 0 | 0 | 1 | 0 | 0 | 0 | 3.40%  | 0      | 0      | 0 | CE07537 WBGene00020808 calponin-like protein status:Confirmed TR:Q   | 1 | 0 |
| F39B2.10   | 1 | 0 | 0 | 0 | 0 | 1 | 0 | 0 | 0 | 3.20%  | 0      | 0      | 0 | CE16015 WBGene00001030 locus:dj-12 DnaJ, prokaryotic heat shock p    | 1 | 0 |
| D2096.8    | 0 | 0 | 1 | 0 | 0 | 0 | 0 | 1 | 0 | 0      | 6.60%  | 0      | 0 | CE04306 WBGene00017075 status:Confirmed TR:Q19007 protein_id:AA      | 1 | 0 |
| F22G12.1   | 1 | 0 | 0 | 0 | 0 | 1 | 0 | 0 | 0 | 3.10%  | 0      | 0      | 0 | CE39571 WBGene00009061 status:Predicted TR:O45395 protein_id:CA      | 1 | 0 |
| Y71A12B.10 | 0 | 0 | 1 | 0 | 0 | 0 | 0 | 1 | 0 | 0      | 2.00%  | 0      | 0 | CE26237 WBGene00013507 status:Partially_confirmed TR:Q9GRV1 pro      | 1 | 0 |
| F22B7.5a   | 1 | 0 | 0 | 0 | 0 | 1 | 0 | 0 | 0 | 2.60%  | 0      | 0      | 0 | CE24911 WBGene00001028 locus:dj-10 status:Confirmed SW:Q8TA83        | 1 | 0 |
| F22B7.5b   | 1 | 0 | 0 | 0 | 0 | 1 | 0 | 0 | 0 | 2.70%  | 0      | 0      | 0 | CE27991 WBGene00001028 locus:dj-10 status:Confirmed SW:Q8TA83        | 1 | 0 |
| F55F8.4    | 1 | 0 | 0 | 0 | 0 | 1 | 0 | 0 | 0 | 3.20%  | 0      | 0      | 0 | CE11194 WBGene00018892 locus:cir-1 status:Confirmed TR:P91342 pro    | 1 | 0 |
| F56C9.1    | 0 | 0 | 1 | 0 | 0 | 0 | 0 | 1 | 0 | 0      | 5.10%  | 0      | 0 | CE01319 WBGene00001748 locus:gsp-2 status:Confirmed SW:P48727 p      | 1 | 0 |
| C46G7.4c   | 1 | 0 | 1 | 0 | 0 | 1 | 0 | 1 | 0 | 1.20%  | 0      | 1.70%  | 0 | CE37214 WBGene00004112 locus:pqn-22 status:Partially_confirmed TR    | 2 | 0 |
| C46G7.4a   | 1 | 0 | 1 | 0 | 0 | 1 | 0 | 1 | 0 | 0.90%  | 0      | 1.40%  | 0 | CE08780 WBGene00004112 locus:pqn-22 status:Partially_confirmed TR    | 2 | 0 |
| K02F2.2    | 2 | 0 | 0 | 0 | 0 | 2 | 0 | 0 | 0 | 6.20%  | 0      | 0      | 0 | CE17154 WBGene00019322 S-adenosylhomocysteine hydrolase status:      | 2 | 0 |
| K01C8.10   | 2 | 0 | 0 | 0 | 0 | 2 | 0 | 0 | 0 | 7.00%  | 0      | 0      | 0 | CE02262 WBGene00000379 locus:cct-4 T-complex protein status:Confir   | 2 | 0 |
| Y65B4BR.5a | 2 | 0 | 0 | 0 | 0 | 2 | 0 | 0 | 0 | 13.80% | 0      | 0      | 0 | CE22740 WBGene00022042 status:Confirmed SW:Q86S66 protein_id:A       | 2 | 0 |
| Y65B4BR.5b | 2 | 0 | 0 | 0 | 0 | 2 | 0 | 0 | 0 | 13.70% | 0      | 0      | 0 | CE33239 WBGene00022042 status:Confirmed SW:Q86S66 protein_id:A       | 2 | 0 |
| F20B6.2    | 1 | 0 | 0 | 0 | 0 | 2 | 0 | 0 | 0 | 2.40%  | 0      | 0      | 0 | CE04424 WBGene00006921 locus:vha-12 vacuolar ATP synthase (strong    | 2 | 0 |
| K10B3.10   | 2 | 0 | 0 | 0 | 0 | 2 | 0 | 0 | 0 | 1.20%  | 0      | 0      | 0 | CE07373 WBGene00004951 locus:spc-1 spectrin alpha chain status:Par   | 2 | 0 |
| R12E2.13   | 2 | 0 | 0 | 0 | 0 | 2 | 0 | 0 | 0 | 13.10% | 0      | 0      | 0 | CE18145 WBGene00020038 status:Confirmed TR:O61793 protein_id:AA      | 2 | 0 |
| Y106G6G.1  | 2 | 0 | 0 | 0 | 0 | 2 | 0 | 0 | 0 | 6.50%  | 0      | 0      | 0 | CE23211 WBGene00013710 status:Partially_confirmed TR:Q23311 prote    | 2 | 0 |
| C34F11.3c  | 2 | 0 | 0 | 0 | 0 | 2 | 0 | 0 | 0 | 3.50%  | 0      | 0      | 0 | CE39332 WBGene00016415 status:Confirmed TR:Q2V4S6 protein_id:AE      | 2 | 0 |
| C34F11.3a  | 2 | 0 | 0 | 0 | 0 | 2 | 0 | 0 | 0 | 3.80%  | 0      | 0      | 0 | CE33034 WBGene00016415 AMP deaminase status:Confirmed TR:Q184        | 2 | 0 |
| C34F11.3b  | 2 | 0 | 0 | 0 | 0 | 2 | 0 | 0 | 0 | 3.70%  | 0      | 0      | 0 | CE33035 WBGene00016415 status:Confirmed TR:Q95ZX5 protein_id:AA      | 2 | 0 |
| F44E5.4    | 1 | 0 | 1 | 0 | 0 | 1 | 0 | 1 | 0 | 2.00%  | 0      | 2.00%  | 0 | CE18679 WBGene00009691 Heat shock hsp70 proteins status:Partially    | 2 | 0 |
| F44E5.5    | 1 | 0 | 1 | 0 | 0 | 1 | 0 | 1 | 0 | 2.00%  | 0      | 2.00%  | 0 | CE18679 WBGene00009692 Heat shock hsp70 proteins status:Partially    | 2 | 0 |
| Y43F8B.1b  | 1 | 0 | 1 | 0 | 0 | 1 | 0 | 1 | 0 | 6.40%  | 0      | 6.40%  | 0 | CE32016 WBGene00012812 status:Confirmed TR:Q8I4D3 protein_id:CA      | 2 | 0 |
| R119.4     | 1 | 0 | 1 | 0 | 0 | 1 | 0 | 1 | 0 | 2.20%  | 0      | 2.20%  | 0 | CE23925 WBGene00004143 locus:pqn-59 status:Confirmed TR:O61708       | 2 | 0 |
| F54H12.6   | 1 | 0 | 0 | 0 | 0 | 2 | 0 | 0 | 0 | 6.10%  | 0      | 0      | 0 | CE00548 WBGene00018846 Elongation factor 1 status:Confirmed SW:P     | 2 | 0 |
| D2085.1    | 2 | 0 | 0 | 0 | 0 | 2 | 0 | 0 | 0 | 1.20%  | 0      | 0      | 0 | CE03105 WBGene00004259 locus:pyr-1 glutamine-dependent carbamoy      | 2 | 0 |
| Y82E9BR.15 | 2 | 0 | 0 | 0 | 0 | 2 | 0 | 0 | 0 | 24.20% | 0      | 0      | 0 | CE27039 WBGene00001236 locus:elc-1 status:Confirmed TR:Q9BK51 p      | 2 | 0 |
| F46F11.2   | 0 | 0 | 2 | 0 | 0 | 0 | 0 | 2 | 0 | 0      | 13.10% | 0      | 0 | CE10598 WBGene00000473 locus:cey-2 status:Confirmed TR:P91306 p      | 2 | 0 |
| Y18D10A.17 | 1 | 0 | 0 | 0 | 0 | 2 | 0 | 0 | 0 | 5.60%  | 0      | 0      | 0 | CE21413 WBGene00012484 locus:car-1 status:Confirmed TR:Q9XW17        | 2 | 0 |
| C12C8.1    | 1 | 0 | 1 | 0 | 0 | 1 | 0 | 1 | 0 | 2.00%  | 0      | 2.00%  | 0 | CE08110 WBGene00002026 locus:hsp-70 heat shock protein 70 status:F   | 2 | 0 |
| C34G6.7b   | 1 | 0 | 1 | 0 | 0 | 1 | 0 | 1 | 0 | 4.80%  | 0      | 4.80%  | 0 | CE32816 WBGene00004109 locus:pqn-19 status:Confirmed TR:Q8I7I2 p     | 2 | 0 |
| C34G6.7a   | 1 | 0 | 1 | 0 | 0 | 1 | 0 | 1 | 0 | 4.20%  | 0      | 4.20%  | 0 | CE29700 WBGene00004109 locus:pqn-19 status:Confirmed TR:O01498       | 2 | 0 |
| E04A4.8    | 0 | 0 | 2 | 0 | 0 | 0 | 0 | 2 | 0 | 0      | 15.00% | 0      | 0 | CE21392 WBGene00004432 locus:rpl-20 ribosomal protein status:Confir  | 2 | 0 |
| Y66H1A.4   | 1 | 0 | 1 | 0 | 0 | 1 | 0 | 1 | 0 | 6.60%  | 0      | 6.60%  | 0 | CE36757 WBGene00022046 nucleolar protein required for pre-rRNA spli  | 2 | 0 |
| C05E4.9a   | 2 | 0 | 0 | 0 | 0 | 2 | 0 | 0 | 0 | 2.70%  | 0      | 0      | 0 | CE23521 WBGene00001564 locus:gel-7 isocitrate lyase status:Confirme  | 2 | 0 |
| T23G11.3   | 1 | 0 | 1 | 0 | 0 | 1 | 0 | 1 | 0 | 3.00%  | 0      | 5.40%  | 0 | CE14096 WBGene00001595 locus:gld-1 female germline-specific tumor    | 2 | 0 |
| Y71A12B.1  | 1 | 0 | 0 | 0 | 0 | 2 | 0 | 0 | 0 | 6.10%  | 0      | 0      | 0 | CE24592 WBGene00004475 locus:rps-6 40S ribosomal protein S6 statu    | 2 | 0 |
| R31.1      | 2 | 0 | 0 | 0 | 0 | 2 | 0 | 0 | 0 | 0.70%  | 0      | 0      | 0 | CE27773 WBGene00004855 locus:sma-1 spectrin beta chain status:Part   | 2 | 0 |
| C49H3.11   | 2 | 0 | 0 | 0 | 0 | 2 | 0 | 0 | 0 | 8.10%  | 0      | 0      | 0 | CE04237 WBGene00004471 locus:rps-2 status:Confirmed SW:P51403 p      | 2 | 0 |
| C55B7.4a   | 0 | 0 | 2 | 0 | 0 | 0 | 0 | 2 | 0 | 0      | 9.40%  | 0      | 0 | CE09015 WBGene00016943 locus:acdH-1 acyl-CoA dehydrogenase stat      | 2 | 0 |
| B0250.1    | 2 | 0 | 0 | 0 | 0 | 2 | 0 | 0 | 0 | 8.10%  | 0      | 0      | 0 | CE18478 WBGene00004413 locus:rpl-2 Ribosomal Proteins L2 status:Co   | 2 | 0 |
| C27A2.2a   | 1 | 0 | 1 | 0 | 0 | 1 | 0 | 1 | 0 | 8.50%  | 0      | 8.50%  | 0 | CE04102 WBGene00004434 locus:rpl-22 ribosomal protein L22 status:Co  | 2 | 0 |
| Y41E3.10a  | 1 | 0 | 0 | 0 | 0 | 2 | 0 | 0 | 0 | 4.90%  | 0      | 0      | 0 | CE37568 WBGene00012768 Elongation factor 1 (beta/delta chain) statu  | 2 | 0 |
| F54E2.3b   | 2 | 0 | 0 | 0 | 0 | 2 | 0 | 0 | 0 | 0.90%  | 0      | 0      | 0 | CE28729 WBGene00004130 locus:ketr-1 status:Confirmed TR:Q965G2       | 2 | 0 |
| F54E2.3a   | 2 | 0 | 0 | 0 | 0 | 2 | 0 | 0 | 0 | 0.80%  | 0      | 0      | 0 | CE30078 WBGene00004130 locus:ketr-1 status:Partially_confirmed       | 2 | 0 |
| F54E2.3d   | 2 | 0 | 0 | 0 | 0 | 2 | 0 | 0 | 0 | 0.80%  | 0      | 0      | 0 | CE30808 WBGene00004130 locus:ketr-1 status:Partially_confirmed TR:   | 2 | 0 |
| F54E2.3c   | 2 | 0 | 0 | 0 | 0 | 2 | 0 | 0 | 0 | 0.80%  | 0      | 0      | 0 | CE30807 WBGene00004130 locus:ketr-1 status:Partially_confirmed TR:   | 2 | 0 |
| F32B6.4    | 2 | 0 | 1 | 0 | 0 | 2 | 0 | 1 | 0 | 12.60% | 0      | 6.30%  | 0 | CE20742 WBGene00009321 status:Confirmed TR:O45432 protein_id:CA      | 3 | 0 |
| F38B2.1a   | 1 | 0 | 2 | 0 | 0 | 1 | 0 | 2 | 0 | 2.10%  | 0      | 5.20%  | 0 | CE31506 WBGene00002050 locus:ifa-1 intermediate filament protein sta | 3 | 0 |
| F38B2.1b   | 1 | 0 | 2 | 0 | 0 | 1 | 0 | 2 | 0 | 2.10%  | 0      | 5.20%  | 0 | CE31507 WBGene00002050 locus:ifa-1 intermediate filament protein sta | 3 | 0 |
| F38B2.1c   | 1 | 0 | 2 | 0 | 0 | 1 | 0 | 2 | 0 | 2.10%  | 0      | 5.30%  | 0 | CE05824 WBGene00002050 locus:ifa-1 status:Confirmed TR:Q0G822 pr     | 3 | 0 |
| Y24D9A.4c  | 1 | 0 | 2 | 0 | 0 | 1 | 0 | 2 | 0 | 4.90%  | 0      | 10.60% | 0 | CE30401 WBGene00004419 locus:rpl-7A status:Confirmed SW:Q966C6       | 3 | 0 |
| Y24D9A.4a  | 1 | 0 | 2 | 0 | 0 | 1 | 0 | 2 | 0 | 4.50%  | 0      | 9.80%  | 0 | CE27398 WBGene00004419 locus:rpl-7A status:Confirmed SW:Q966C6       | 3 | 0 |
| R07E5.14   | 1 | 0 | 2 | 0 | 0 | 1 | 0 | 2 | 0 | 13.40% | 0      | 27.50% | 0 | CE01044 WBGene00004387 locus:rnp-4 RNA binding domain status:Cor     | 3 | 0 |
| K10C8.3a   | 2 | 0 | 1 | 0 | 0 | 2 | 0 | 1 | 0 | 7.90%  | 0      | 3.60%  | 0 | CE31969 WBGene00010736 Human KIAA0174 protein like status:Confir     | 3 | 0 |
| K10C8.3c   | 2 | 0 | 1 | 0 | 0 | 2 | 0 | 1 | 0 | 8.10%  | 0      | 3.70%  | 0 | CE06169 WBGene00010736 status:Confirmed TR:A5Z2T2 protein_id:CA      | 3 | 0 |
| B0365.3    | 3 | 0 | 0 | 0 | 0 | 3 | 0 | 0 | 0 | 5.00%  | 0      | 0      | 0 | CE07721 WBGene00001137 locus:eat-6 Na(+)/K(+) ATPase alpha subu      | 3 | 0 |
| JC8.3a     | 2 | 0 | 1 | 0 | 0 | 2 | 0 | 1 | 0 | 17.00% | 0      | 7.90%  | 0 | CE17986 WBGene00004424 locus:rpl-12 Ribosomal protein L11 status:Co  | 3 | 0 |
| H28O16.1c  | 2 | 0 | 1 | 0 | 0 | 2 | 0 | 1 | 0 | 5.40%  | 0      | 4.40%  | 0 | CE34195 WBGene00010419 status:Confirmed SW:Q9XXX1 protein_id:Co      | 3 | 0 |

|                   |   |   |   |   |   |   |   |   |        |       |        |        |         |                |                                               |   |   |
|-------------------|---|---|---|---|---|---|---|---|--------|-------|--------|--------|---------|----------------|-----------------------------------------------|---|---|
| F25H2.10          | 2 | 0 | 1 | 0 | 2 | 0 | 1 | 0 | 9.60%  | 0     | 3.80%  | 0      | CE09655 | WBGene00004408 | locus:rpa-0 deoxyribonuclease status:Confir   | 3 | 0 |
| F17C11.9a         | 2 | 0 | 0 | 0 | 3 | 0 | 0 | 0 | 8.50%  | 0     | 0      | 0      | CE05656 | WBGene00008920 | elongation factor 1-gamma status:Confirme     | 3 | 0 |
| F17C11.9c         | 2 | 0 | 0 | 0 | 3 | 0 | 0 | 0 | 9.30%  | 0     | 0      | 0      | CE39492 | WBGene00008920 | status:Confirmed TR:Q2PJ76 protein_id:CA      | 3 | 0 |
| F17C11.9b         | 2 | 0 | 0 | 0 | 3 | 0 | 0 | 0 | 9.10%  | 0     | 0      | 0      | CE32385 | WBGene00008920 | status:Confirmed TR:Q8I4K9 protein_id:CA      | 3 | 0 |
| C14B1.1           | 1 | 0 | 1 | 0 | 2 | 0 | 1 | 0 | 4.70%  | 0     | 3.30%  | 0      | CE00897 | WBGene00003962 | locus:pdi-1 protein disulfide isomerase statu | 3 | 0 |
| Y22F5A.5          | 1 | 0 | 1 | 0 | 2 | 0 | 1 | 0 | 6.80%  | 0     | 5.40%  | 0      | CE16606 | WBGene00003091 | locus:lys-2 status:Confirmed TR:O62416 pr     | 3 | 0 |
| R08B4.1a          | 3 | 0 | 0 | 0 | 3 | 0 | 0 | 0 | 3.70%  | 0     | 0      | 0      | CE34080 | WBGene00001690 | locus:grd-1 groundhog status:Partially_conf   | 3 | 0 |
| R08B4.1b          | 3 | 0 | 0 | 0 | 3 | 0 | 0 | 0 | 3.60%  | 0     | 0      | 0      | CE34081 | WBGene00001690 | locus:grd-1 groundhog status:Partially_conf   | 3 | 0 |
| F25B5.4c          | 1 | 0 | 0 | 0 | 4 | 0 | 0 | 0 | 3.00%  | 0     | 0      | 0      | CE31915 | WBGene00006727 | locus:ubq-1 status:Confirmed TR:Q8MYQ4        | 4 | 0 |
| F25B5.4a          | 1 | 0 | 0 | 0 | 4 | 0 | 0 | 0 | 1.90%  | 0     | 0      | 0      | CE01921 | WBGene00006727 | locus:ubq-1 status:Confirmed                  | 4 | 0 |
| C44B11.3          | 1 | 0 | 2 | 0 | 2 | 0 | 2 | 0 | 4.00%  | 0     | 8.70%  | 0      | CE24843 | WBGene00003175 | locus:mec-12 alpha tubulin status:Confirme    | 4 | 0 |
| F39B2.6           | 1 | 0 | 1 | 0 | 2 | 0 | 2 | 0 | 12.80% | 0     | 12.80% | 0      | CE16012 | WBGene00004495 | locus:rps-26 40S ribosomal protein S26 sta    | 4 | 0 |
| F37C12.11         | 1 | 0 | 0 | 0 | 4 | 0 | 0 | 0 | 20.50% | 0     | 0      | 0      | CE30779 | WBGene00004490 | locus:rps-21 Ribosomal protein S21 status:    | 4 | 0 |
| ZK1010.1          | 1 | 0 | 0 | 0 | 4 | 0 | 0 | 0 | 12.50% | 0     | 0      | 0      | CE15495 | WBGene00006728 | locus:ubq-2 UBQ-2 ubiquitin; 60S Ribosom      | 4 | 0 |
| W09H1.6b          | 3 | 0 | 1 | 0 | 3 | 0 | 1 | 0 | 16.50% | 0     | 3.50%  | 0      | CE16577 | WBGene00002264 | locus:lec-1 galectin status:Confirmed TR:Q    | 4 | 0 |
| W09H1.6a          | 3 | 0 | 1 | 0 | 3 | 0 | 1 | 0 | 16.80% | 0     | 3.60%  | 0      | CE16576 | WBGene00002264 | locus:lec-1 galectin status:Confirmed SW:P    | 4 | 0 |
| M142.5            | 2 | 0 | 1 | 0 | 3 | 0 | 1 | 0 | 12.00% | 0     | 5.30%  | 0      | CE37539 | WBGene00010922 | status:Confirmed TR:Q21541 protein_id:CA      | 4 | 0 |
| Y73B6BL.6b        | 3 | 0 | 0 | 0 | 4 | 0 | 0 | 0 | 14.30% | 0     | 0      | 0      | CE38662 | WBGene00022235 | locus:sgd-1 status:Confirmed TR:Q4W5P0        | 4 | 0 |
| Y73B6BL.6a        | 3 | 0 | 0 | 0 | 4 | 0 | 0 | 0 | 14.40% | 0     | 0      | 0      | CE29008 | WBGene00022235 | locus:sgd-1 status:Confirmed TR:Q8MXR6        | 4 | 0 |
| Reverse_F55A12.4a | 1 | 0 | 0 | 0 | 4 | 0 | 0 | 0 | 3.50%  | 0     | 0      | 0      | CE26924 | WBGene00000966 | locus:dhs-2 dehydrogenase status:Partially    | 4 | 0 |
| Reverse_F55A12.4c | 1 | 0 | 0 | 0 | 4 | 0 | 0 | 0 | 3.80%  | 0     | 0      | 0      | CE11123 | WBGene00000966 | locus:dhs-2 status:Partially_confirmed TR:Q   | 4 | 0 |
| F09E5.15          | 3 | 0 | 0 | 0 | 4 | 0 | 0 | 0 | 20.50% | 0     | 0      | 0      | CE32361 | WBGene00006434 | locus:prdx-2 status:Confirmed TR:Q8IG31 p     | 4 | 0 |
| C44B12.5          | 1 | 0 | 2 | 0 | 1 | 0 | 4 | 0 | 3.50%  | 0     | 8.60%  | 0      | CE16921 | WBGene00016638 | status:Partially_confirmed TR:O44144 prote    | 5 | 0 |
| C44B12.1          | 2 | 0 | 2 | 0 | 3 | 0 | 2 | 0 | 14.30% | 0     | 14.80% | 0      | CE27850 | WBGene00016636 | status:Confirmed TR:O44145 protein_id:AA      | 5 | 0 |
| K08H10.1          | 3 | 0 | 2 | 0 | 3 | 0 | 2 | 0 | 5.50%  | 0     | 4.00%  | 0      | CE18875 | WBGene00002263 | locus:lea-1 status:Confirmed TR:O16527 pr     | 5 | 0 |
| Y42H9AR.1         | 2 | 0 | 3 | 0 | 2 | 0 | 4 | 0 | 4.30%  | 0     | 10.10% | 0      | CE25278 | WBGene00021536 | status:Partially_confirmed TR:Q9N3Y1 pr       | 6 | 0 |
| F55D12.2          | 4 | 0 | 3 | 0 | 5 | 0 | 3 | 0 | 7.00%  | 0     | 6.60%  | 0      | CE32439 | WBGene00010111 | status:Partially_confirmed TR:Q20833 prote    | 8 | 0 |
| Y106G6H.4         | 1 | 1 | 0 | 0 | 1 | 1 | 0 | 0 | 5.60%  | 5.60% | 0      | 0      | CE20414 | WBGene00013717 | status:Partially_confirmed TR:Q9XWS3 pro      | 1 | 1 |
| ZK899.4           | 1 | 0 | 0 | 1 | 1 | 0 | 0 | 1 | 2.00%  | 0     | 0      | 4.60%  | CE37468 | WBGene00006534 | locus:tba-8 tubulin alpha chain status:Parti  | 1 | 1 |
| Y71F9AL.13b       | 0 | 1 | 1 | 0 | 0 | 1 | 1 | 0 | 8.40%  | 8.40% | 0      | 0      | CE28379 | WBGene00004412 | locus:rpl-1 status:Confirmed TR:Q95Y46 pr     | 1 | 1 |
| F43E2.8           | 0 | 0 | 1 | 1 | 0 | 0 | 1 | 1 | 0      | 0     | 2.30%  | 2.30%  | CE07244 | WBGene00002008 | locus:hsp-4 heat shock protein status:Parti   | 1 | 1 |
| F46H5.3a          | 1 | 1 | 0 | 0 | 1 | 1 | 0 | 0 | 4.00%  | 3.50% | 0      | 0      | CE37112 | WBGene00018519 | arginine kinase status:Confirmed SW:Q104      | 1 | 1 |
| F46H5.3b          | 1 | 1 | 0 | 0 | 1 | 1 | 0 | 0 | 4.50%  | 3.90% | 0      | 0      | CE33098 | WBGene00018519 | status:Confirmed SW:Q10454 protein_id:AA      | 1 | 1 |
| R03G5.1a          | 1 | 0 | 0 | 1 | 1 | 0 | 0 | 1 | 2.80%  | 0     | 0      | 2.80%  | CE01270 | WBGene00001169 | locus:eft-4 elongation factor EF-1-alpha sta  | 1 | 1 |
| R03G5.1d          | 1 | 0 | 0 | 1 | 1 | 0 | 0 | 1 | 3.00%  | 0     | 0      | 3.00%  | CE33155 | WBGene00001169 | locus:eft-4 status:Confirmed TR:Q86NF5 pr     | 1 | 1 |
| T05E11.3          | 1 | 1 | 0 | 0 | 1 | 1 | 0 | 0 | 1.20%  | 1.60% | 0      | 0      | CE06362 | WBGene00011480 | endoplasmic precursor (GRP94) status:Cor      | 1 | 1 |
| F57A8.1           | 0 | 0 | 1 | 1 | 0 | 1 | 1 | 0 | 0      | 0     | 7.40%  | 7.40%  | CE34035 | WBGene00010177 | ETS domain status:Partially_confirmed TR:     | 1 | 1 |
| W08E12.7          | 1 | 1 | 0 | 0 | 1 | 1 | 0 | 0 | 3.30%  | 3.30% | 0      | 0      | CE21275 | WBGene00021088 | peptidase status:Confirmed TR:Q9N5B3 pr       | 1 | 1 |
| F52D10.3a         | 0 | 1 | 1 | 0 | 0 | 1 | 1 | 0 | 0      | 5.20% | 5.20%  | 0      | CE03389 | WBGene00001502 | locus:ftt-2 14-3-3 protein status:Confirmed   | 1 | 1 |
| F52D10.3b         | 0 | 1 | 1 | 0 | 0 | 1 | 1 | 0 | 0      | 6.60% | 6.60%  | 0      | CE36489 | WBGene00001502 | locus:ftt-2 status:Confirmed TR:Q95ZT1 pr     | 1 | 1 |
| F31E3.5           | 1 | 0 | 0 | 1 | 1 | 0 | 0 | 1 | 2.80%  | 0     | 0      | 2.80%  | CE01270 | WBGene00001168 | locus:eft-3 Elongation factor 1-alpha statu   | 1 | 1 |
| C37C3.6c          | 0 | 1 | 1 | 0 | 0 | 1 | 1 | 0 | 0      | 1.20% | 1.20%  | 0      | CE30735 | WBGene00016498 | locus:ppn-1 status:Partially_confirmed SW:    | 1 | 1 |
| C37C3.6a          | 0 | 1 | 1 | 0 | 0 | 1 | 1 | 0 | 0      | 1.20% | 1.20%  | 0      | CE17535 | WBGene00016498 | locus:ppn-1 protease inhibitor status:Partial | 1 | 1 |
| C37C3.6b          | 0 | 1 | 1 | 0 | 0 | 1 | 1 | 0 | 0      | 0.80% | 0.80%  | 0      | CE17536 | WBGene00016498 | locus:ppn-1 protease inhibitor status:Partial | 1 | 1 |
| R02F11.3a         | 1 | 1 | 0 | 0 | 1 | 1 | 0 | 0 | 2.40%  | 2.40% | 0      | 0      | CE36883 | WBGene00019841 | status:Partially_confirmed TR:O16365 prote    | 1 | 1 |
| R02F11.3b         | 1 | 1 | 0 | 0 | 1 | 1 | 0 | 0 | 2.20%  | 2.20% | 0      | 0      | CE37658 | WBGene00019841 | status:Partially_confirmed TR:Q5ZR77 prot     | 1 | 1 |
| K11C4.3a          | 1 | 1 | 0 | 0 | 1 | 1 | 0 | 0 | 0.80%  | 0.80% | 0      | 0      | CE28604 | WBGene00006803 | locus:unc-70 spectrin beta chain status:Cor   | 1 | 1 |
| K11C4.3b          | 1 | 1 | 0 | 0 | 1 | 1 | 0 | 0 | 0.70%  | 0.80% | 0      | 0      | CE30159 | WBGene00006803 | locus:unc-70 status:Confirmed TR:Q95ZL8       | 1 | 1 |
| F10G7.10a         | 1 | 0 | 0 | 1 | 1 | 0 | 0 | 1 | 0.70%  | 0     | 0      | 0.80%  | CE39718 | WBGene00017373 | status:Partially_confirmed TR:Q1W0R7 pro      | 1 | 1 |
| F10G7.10b         | 1 | 0 | 0 | 1 | 1 | 0 | 0 | 1 | 0.80%  | 0     | 0      | 0.90%  | CE39719 | WBGene00017373 | status:Partially_confirmed TR:Q1W0R6 pro      | 1 | 1 |
| F10G7.10c         | 1 | 0 | 0 | 1 | 1 | 0 | 0 | 1 | 0.80%  | 0     | 0      | 0.90%  | CE39720 | WBGene00017373 | status:Partially_confirmed TR:Q1W0R5 pro      | 1 | 1 |
| F31D5.3a          | 1 | 0 | 0 | 1 | 1 | 0 | 0 | 1 | 1.50%  | 0     | 0      | 3.10%  | CE19827 | WBGene00006495 | locus:tag-149 status:Partially_confirmed TR   | 1 | 1 |
| F31D5.3d          | 1 | 0 | 0 | 1 | 1 | 0 | 0 | 1 | 2.00%  | 0     | 0      | 4.30%  | CE31798 | WBGene00006495 | locus:tag-149 status:Partially_confirmed TR   | 1 | 1 |
| F31D5.3b          | 1 | 0 | 0 | 1 | 1 | 0 | 0 | 1 | 1.40%  | 0     | 0      | 3.10%  | CE19828 | WBGene00006495 | locus:tag-149 status:Partially_confirmed TR   | 1 | 1 |
| C37H5.8           | 1 | 1 | 0 | 0 | 1 | 1 | 0 | 0 | 1.80%  | 1.80% | 0      | 0      | CE08631 | WBGene00002010 | locus:hsp-6 heat shock 70 protein status:Pa   | 1 | 1 |
| C36E6.3           | 0 | 0 | 2 | 1 | 0 | 0 | 2 | 1 | 0      | 0     | 22.40% | 11.80% | CE34269 | WBGene00003369 | locus:mlc-1 status:Confirmed SW:P19625 p      | 2 | 1 |
| C36E6.5           | 0 | 0 | 2 | 1 | 0 | 0 | 2 | 1 | 0      | 0     | 22.40% | 11.80% | CE20542 | WBGene00003370 | locus:mlc-2 status:Confirmed SW:P19626 p      | 2 | 1 |
| C07A12.4c         | 1 | 1 | 1 | 0 | 1 | 1 | 1 | 0 | 3.80%  | 3.80% | 3.00%  | 0      | CE40737 | WBGene00003963 | locus:pdi-2 status:Confirmed TR:A3RMS2 p      | 2 | 1 |
| Y65B4A.6          | 1 | 1 | 1 | 0 | 1 | 1 | 1 | 0 | 2.50%  | 3.30% | 2.80%  | 0      | CE34419 | WBGene00022029 | status:Partially_confirmed TR:Q9BL61 pr       | 2 | 1 |
| T26A5.9           | 2 | 0 | 0 | 1 | 2 | 0 | 0 | 1 | 24.70% | 0     | 0      | 24.70% | CE00788 | WBGene00001005 | locus:dlic-1 status:Confirmed SW:Q22799 p     | 2 | 1 |
| ZC477.9c          | 2 | 1 | 0 | 0 | 2 | 1 | 0 | 0 | 3.60%  | 1.50% | 0      | 0      | CE31398 | WBGene00000942 | locus:deb-1 status:Confirmed TR:Q8MPS2        | 2 | 1 |
| ZC477.9a          | 2 | 1 | 0 | 0 | 2 | 1 | 0 | 0 | 3.60%  | 1.50% | 0      | 0      | CE31396 | WBGene00000942 | locus:deb-1 status:Confirmed SW:P19826 p      | 2 | 1 |
| C56C10.8          | 1 | 0 | 1 | 1 | 1 | 0 | 1 | 1 | 11.80% | 0     | 11.80% | 11.80% | CE02573 | WBGene00002045 | locus:icd-1 Transcription factor BTF3 (huma   | 2 | 1 |

|            |   |   |   |   |   |   |   |   |        |        |        |        |         |                |                                                                          |                                           |   |   |
|------------|---|---|---|---|---|---|---|---|--------|--------|--------|--------|---------|----------------|--------------------------------------------------------------------------|-------------------------------------------|---|---|
| F33D11.10  | 1 | 1 | 1 | 0 | 1 | 1 | 1 | 0 | 2.50%  | 3.30%  | 2.80%  | 0      | CE09901 | WBGene00018007 | initiation factor/helicase status:Confirmed TR:Q9XTH4 protein_id:C       | 2                                         | 1 |   |
| K08H10.2a  | 1 | 1 | 1 | 0 | 1 | 1 | 1 | 0 | 3.60%  | 3.60%  | 3.60%  | 0      | CE31359 | WBGene00010695 | status:Confirmed TR:Q9XTH4 protein_id:C                                  | 2                                         | 1 |   |
| K08H10.2b  | 1 | 1 | 1 | 0 | 1 | 1 | 1 | 0 | 3.20%  | 3.20%  | 3.20%  | 0      | CE37843 | WBGene00010695 | status:Partially_confirmed TR:Q9XVV2 prot                                | 2                                         | 1 |   |
| F54C9.5    | 2 | 1 | 0 | 0 | 2 | 1 | 0 | 0 | 10.90% | 3.10%  | 0      | 0      | CE02255 | WBGene00004416 | locus:rpl-5 60S ribosomal protein L5 status:                             | 2                                         | 1 |   |
| C44F1.3    | 1 | 0 | 1 | 1 | 1 | 0 | 1 | 1 | 4.90%  | 0      | 4.90%  | 4.90%  | CE02163 | WBGene00002267 | locus:lec-4 galactoside binding lectin status:                           | 2                                         | 1 |   |
| F40F11.1   | 2 | 0 | 0 | 1 | 2 | 0 | 0 | 1 | 6.50%  | 0      | 0      | 6.50%  | CE05860 | WBGene00004480 | locus:rps-11 ribosomal protein S11 status:C                              | 2                                         | 1 |   |
| Y105E8B.1a | 2 | 1 | 0 | 0 | 2 | 1 | 0 | 0 | 7.40%  | 3.20%  | 0      | 0      | CE28782 | WBGene00002978 | locus:lev-11 status:Partially_confirmed SW:                              | 2                                         | 1 |   |
| Y105E8B.1b | 2 | 1 | 0 | 0 | 2 | 1 | 0 | 0 | 10.90% | 4.70%  | 0      | 0      | CE36223 | WBGene00002978 | locus:lev-11 status:Partially_confirmed SW:                              | 2                                         | 1 |   |
| Y105E8B.1d | 2 | 1 | 0 | 0 | 2 | 1 | 0 | 0 | 7.40%  | 3.20%  | 0      | 0      | CE29060 | WBGene00002978 | locus:lev-11 status:Partially_confirmed SW:                              | 2                                         | 1 |   |
| F43G9.1    | 2 | 1 | 0 | 0 | 2 | 1 | 0 | 0 | 6.40%  | 3.40%  | 0      | 0      | CE34018 | WBGene00009664 | lococitrate dehydrogenase status:Confirmed                               | 2                                         | 1 |   |
| C04C11.2   | 2 | 1 | 0 | 0 | 2 | 1 | 0 | 0 | 4.60%  | 2.60%  | 0      | 0      | CE05210 | WBGene00007296 | status:Confirmed TR:Q17624 protein_id:CA                                 | 2                                         | 1 |   |
| Y62E10A.1  | 1 | 0 | 1 | 1 | 1 | 0 | 2 | 1 | 14.50% | 0      | 14.50% | 14.50% | CE22694 | WBGene00004410 | locus:ria-2 status:Confirmed TR:Q9U1X9 p                                 | 3                                         | 1 |   |
| D1007.12   | 1 | 1 | 0 | 0 | 3 | 1 | 0 | 0 | 8.20%  | 8.20%  | 0      | 0      | CE09047 | WBGene00004436 | locus:rpl-24.1 60S ribosomal protein L24 st                              | 3                                         | 1 |   |
| F52H3.7a   | 2 | 1 | 1 | 0 | 2 | 1 | 1 | 0 | 1.90%  | 1.50%  | 1.50%  | 0      | CE32894 | WBGene00002265 | locus:lec-2 galactoside-binding lectin status:                           | 3                                         | 1 |   |
| F52H3.7b   | 2 | 1 | 1 | 0 | 2 | 1 | 1 | 0 | 8.60%  | 6.80%  | 6.80%  | 0      | CE29330 | WBGene00002265 | locus:lec-2 galactoside-binding lectin status:                           | 3                                         | 1 |   |
| ZC8.4e     | 2 | 1 | 1 | 0 | 2 | 1 | 1 | 0 | 7.80%  | 3.20%  | 3.20%  | 0      | CE38923 | WBGene00022500 | locus:ifi-1 status:Confirmed TR:Q45EJ7 pr                                | 3                                         | 1 |   |
| F37C12.9   | 2 | 0 | 1 | 1 | 2 | 0 | 1 | 1 | 20.40% | 0      | 11.80% | 11.80% | CE00821 | WBGene00004483 | locus:rps-14 Ribosomal protein S14 status:                               | 3                                         | 1 |   |
| F07D10.1   | 1 | 0 | 1 | 1 | 2 | 0 | 1 | 1 | 7.10%  | 0      | 7.10%  | 7.10%  | CE07033 | WBGene00004423 | locus:rpl-11.2 ribosomal protein status:Conf                             | 3                                         | 1 |   |
| T22F3.4    | 1 | 0 | 1 | 1 | 2 | 0 | 1 | 1 | 7.10%  | 0      | 7.10%  | 7.10%  | CE13968 | WBGene00004422 | locus:rpl-11.1 60S ribosomal protein L11 s                               | 3                                         | 1 |   |
| F35D11.2b  | 1 | 0 | 2 | 1 | 2 | 0 | 2 | 1 | 2.90%  | 0      | 7.40%  | 4.50%  | CE31802 | WBGene00004122 | locus:pqn-35 status:Confirmed TR:Q8MQ6                                   | 4                                         | 1 |   |
| F35D11.2a  | 1 | 0 | 2 | 1 | 2 | 0 | 2 | 1 | 3.00%  | 0      | 7.60%  | 4.60%  | CE32647 | WBGene00004122 | locus:pqn-35 status:Confirmed TR:Q20040                                  | 4                                         | 1 |   |
| C23G10.3   | 2 | 1 | 2 | 0 | 2 | 1 | 2 | 0 | 9.70%  | 5.70%  | 12.10% | 0      | CE01810 | WBGene00004472 | locus:rps-3 Ribosomal protein S3 status:Co                               | 4                                         | 1 |   |
| Y41D4B.5   | 1 | 1 | 2 | 0 | 2 | 1 | 2 | 0 | 18.50% | 18.50% | 33.80% | 0      | CE21842 | WBGene00004497 | locus:rps-28 status:Confirmed SW:Q95Y04                                  | 4                                         | 1 |   |
| H27M09.1   | 4 | 0 | 0 | 1 | 5 | 0 | 0 | 1 | 8.10%  | 0      | 0      | 2.50%  | CE23832 | WBGene00019245 | locus:lec-2 galactoside-binding lectin status:Partially_confirmed TR:Q9N | 5                                         | 1 |   |
| H28O16.1a  | 3 | 1 | 2 | 0 | 3 | 1 | 2 | 0 | 7.20%  | 3.00%  | 7.10%  | 0      | CE18826 | WBGene00010419 | ATP synthase alpha and beta subunits, ATP                                | 5                                         | 1 |   |
| H28O16.1d  | 3 | 1 | 2 | 0 | 3 | 1 | 2 | 0 | 7.60%  | 3.10%  | 7.40%  | 0      | CE36263 | WBGene00010419 | status:Confirmed SW:Q9XXK1 protein_id:C                                  | 5                                         | 1 |   |
| T01C3.6    | 2 | 1 | 2 | 0 | 3 | 1 | 2 | 0 | 12.50% | 5.60%  | 16.70% | 0      | CE12918 | WBGene00004485 | locus:rps-16 40S ribosomal protein S16 sta                               | 5                                         | 1 |   |
| B0261.2b   | 4 | 1 | 0 | 0 | 5 | 1 | 0 | 0 | 1.80%  | 0.40%  | 0      | 0      | CE32560 | WBGene00002583 | locus:let-363 status:Partially_confirmed SW                              | 5                                         | 1 |   |
| B0261.2a   | 4 | 1 | 0 | 0 | 5 | 1 | 0 | 0 | 1.80%  | 0.40%  | 0      | 0      | CE32559 | WBGene00002583 | locus:let-363 kinase status:Partially_confirm                            | 5                                         | 1 |   |
| F10C1.2b   | 4 | 0 | 1 | 1 | 4 | 0 | 1 | 1 | 10.20% | 0      | 2.40%  | 2.00%  | CE02619 | WBGene00002053 | locus:ifb-1 Intermediate filament protein sta                            | 5                                         | 1 |   |
| F10C1.2a   | 4 | 0 | 1 | 1 | 4 | 0 | 1 | 1 | 10.80% | 0      | 2.50%  | 2.20%  | CE02618 | WBGene00002053 | locus:ifb-1 Intermediate filament protein sta                            | 5                                         | 1 |   |
| D2045.1a   | 2 | 0 | 2 | 1 | 4 | 0 | 2 | 1 | 3.20%  | 0      | 3.10%  | 1.40%  | CE37889 | WBGene00000231 | locus:atx-2 status:Confirmed TR:Q18987 pr                                | 6                                         | 1 |   |
| D2045.1b   | 2 | 0 | 2 | 1 | 4 | 0 | 2 | 1 | 4.90%  | 0      | 4.70%  | 2.10%  | CE37967 | WBGene00000231 | locus:atx-2 status:Confirmed TR:Q5FC83 p                                 | 6                                         | 1 |   |
| F32A7.5a   | 3 | 1 | 2 | 0 | 5 | 1 | 2 | 0 | 5.40%  | 1.80%  | 4.30%  | 0      | CE09846 | WBGene00009306 | locus:claustrin like status:Partially_confirmed TR:                      | 7                                         | 1 |   |
| F32A7.5c   | 3 | 1 | 2 | 0 | 5 | 1 | 2 | 0 | 5.40%  | 1.80%  | 4.30%  | 0      | CE34179 | WBGene00009306 | status:Partially_confirmed TR:Q7YXB8 prot                                | 7                                         | 1 |   |
| F32A7.5b   | 3 | 1 | 2 | 0 | 5 | 1 | 2 | 0 | 6.20%  | 2.10%  | 5.00%  | 0      | CE34178 | WBGene00009306 | status:Partially_confirmed TR:Q7YXB9 prot                                | 7                                         | 1 |   |
| T25C8.2    | 3 | 0 | 1 | 1 | 6 | 0 | 1 | 1 | 10.10% | 0      | 4.30%  | 4.30%  | CE16463 | WBGene00000067 | locus:act-5 Actins status:Confirmed TR:O45                               | 7                                         | 1 |   |
| F56A3.4    | 2 | 0 | 5 | 1 | 2 | 0 | 5 | 1 | 2.50%  | 0      | 5.40%  | 2.10%  | CE28834 | WBGene00004955 | locus:spd-5 status:Confirmed SW:P91349 p                                 | 7                                         | 1 |   |
| F54E7.2    | 4 | 1 | 2 | 0 | 6 | 1 | 2 | 0 | 22.10% | 7.90%  | 21.40% | 0      | CE26896 | WBGene00004481 | locus:rps-12 status:Confirmed SW:P49196                                  | 8                                         | 1 |   |
| K06C4.2    | 1 | 0 | 0 | 2 | 1 | 0 | 0 | 2 | 6.80%  | 0      | 0      | 17.50% | CE03252 | WBGene00001902 | locus:his-28 histone H4 status:Predicted SV                              | 1                                         | 2 |   |
| T10C6.14   | 1 | 0 | 0 | 2 | 1 | 0 | 0 | 2 | 6.80%  | 0      | 0      | 17.50% | CE03252 | WBGene00001875 | locus:his-1 histone H4 status:Predicted SW                               | 1                                         | 2 |   |
| ZK131.8    | 1 | 0 | 0 | 2 | 1 | 0 | 0 | 2 | 6.80%  | 0      | 0      | 17.50% | CE03252 | WBGene00001888 | locus:his-14 histone H4 status:Predicted SV                              | 1                                         | 2 |   |
| ZK131.1    | 1 | 0 | 0 | 2 | 1 | 0 | 0 | 2 | 6.80%  | 0      | 0      | 17.50% | CE03252 | WBGene00001900 | locus:his-26 histone H4 status:Predicted SV                              | 1                                         | 2 |   |
| ZK131.4    | 1 | 0 | 0 | 2 | 1 | 0 | 0 | 2 | 6.80%  | 0      | 0      | 17.50% | CE03252 | WBGene00001884 | locus:his-10 histone H4 status:Predicted SV                              | 1                                         | 2 |   |
| B0035.9    | 1 | 0 | 0 | 2 | 1 | 0 | 0 | 2 | 6.80%  | 0      | 0      | 17.50% | CE03252 | WBGene00001920 | locus:his-46 histone H4 status:Predicted SV                              | 1                                         | 2 |   |
| F54E12.3   | 1 | 0 | 0 | 2 | 1 | 0 | 0 | 2 | 6.80%  | 0      | 0      | 17.50% | CE03252 | WBGene00001930 | locus:his-56 histone H4 status:Predicted SV                              | 1                                         | 2 |   |
| F55G1.11   | 1 | 0 | 0 | 2 | 1 | 0 | 0 | 2 | 6.80%  | 0      | 0      | 17.50% | CE03252 | WBGene00001934 | locus:his-60 Histone status:Confirmed SW:                                | 1                                         | 2 |   |
| K06C4.10   | 1 | 0 | 0 | 2 | 1 | 0 | 0 | 2 | 6.80%  | 0      | 0      | 17.50% | CE03252 | WBGene00001892 | locus:his-18 histone H4 status:Confirmed SW                              | 1                                         | 2 |   |
| K03A1.6    | 1 | 0 | 0 | 2 | 1 | 0 | 0 | 2 | 6.80%  | 0      | 0      | 17.50% | CE03252 | WBGene00001912 | locus:his-38 histone H4 status:Predicted SV                              | 1                                         | 2 |   |
| F07B7.9    | 1 | 0 | 0 | 2 | 1 | 0 | 0 | 2 | 6.80%  | 0      | 0      | 17.50% | CE03252 | WBGene00001924 | locus:his-50 status:Predicted SW:P62784 p                                | 1                                         | 2 |   |
| F45F2.3    | 1 | 0 | 0 | 2 | 1 | 0 | 0 | 2 | 6.80%  | 0      | 0      | 17.50% | CE03252 | WBGene00001879 | locus:his-5 histone H4 status:Confirmed SW:                              | 1                                         | 2 |   |
| C50F4.7    | 1 | 0 | 0 | 2 | 1 | 0 | 0 | 2 | 6.80%  | 0      | 0      | 17.50% | CE03252 | WBGene00001911 | locus:his-37 histone H4 status:Confirmed S                               | 1                                         | 2 |   |
| C41D11.2   | 0 | 1 | 1 | 1 | 0 | 1 | 1 | 1 | 0      | 3.00%  | 5.80%  | 5.80%  | CE29220 | WBGene00001231 | locus:eif-3.H status:Partially_confirmed TR:                             | 1                                         | 2 |   |
| F42C5.8    | 1 | 0 | 0 | 2 | 1 | 0 | 0 | 2 | 7.20%  | 0      | 0      | 16.30% | CE04561 | WBGene00004477 | locus:rps-8 40S ribosomal protein S8 status:                             | 1                                         | 2 |   |
| F22B3.1    | 1 | 0 | 0 | 2 | 1 | 0 | 0 | 2 | 6.80%  | 0      | 0      | 17.50% | CE03252 | WBGene00001938 | locus:his-64 histone H4 status:Partially_cor                             | 1                                         | 2 |   |
| F17E9.12   | 1 | 0 | 0 | 2 | 1 | 0 | 0 | 2 | 6.80%  | 0      | 0      | 17.50% | CE03252 | WBGene00001905 | locus:his-31 status:Partially_confirmed SW:                              | 1                                         | 2 |   |
| T23D8.5    | 1 | 0 | 0 | 2 | 1 | 0 | 0 | 2 | 6.80%  | 0      | 0      | 17.50% | CE03252 | WBGene00001941 | locus:his-67 histone H4 status:Confirmed S                               | 1                                         | 2 |   |
| F36A2.6    | 1 | 1 | 1 | 1 | 1 | 1 | 1 | 1 | 7.90%  | 7.90%  | 7.90%  | 12.60% | CE09945 | WBGene00004484 | locus:rps-15 40S ribosomal protein S15 sta                               | 2                                         | 2 |   |
| Y53F4B.25  | 1 | 0 | 1 | 0 | 2 | 1 | 0 | 1 | 2      | 2.00%  | 0      | 3.80%  | 6.50%   | CE26158        | WBGene00013171                                                           | status:Partially_confirmed TR:Q9NA94 prot | 2 | 2 |
| B0213.3    | 1 | 1 | 1 | 1 | 1 | 1 | 1 | 1 | 15.40% | 15.40% | 15.40% | 15.40% | CE16774 | WBGene00003766 | locus:nlp-28 status:Confirmed SW:O44665                                  | 2                                         | 2 |   |
| B0213.6    | 1 | 1 | 1 | 1 | 1 | 1 | 1 | 1 | 13.30% | 13.30% | 13.30% | 13.30% | CE16777 | WBGene00003769 | locus:nlp-31 status:Confirmed SW:O44662                                  | 2                                         | 2 |   |
| B0213.4    | 1 | 1 | 1 | 1 | 1 | 1 | 1 | 1 | 13.70% | 13.70% | 13.70% | 13.70% | CE16775 | WBGene00003767 | locus:nlp-29 status:Confirmed SW:O44664                                  | 2                                         | 2 |   |
| B0213.5    | 1 | 1 | 1 | 1 | 1 | 1 | 1 | 1 | 14.50% | 14.50% | 14.50% | 14.50% | CE16776 | WBGene00003768 | locus:nlp-30 status:Confirmed SW:O44663                                  | 2                                         | 2 |   |

|                 |   |   |   |   |    |   |   |   |        |        |        |        |         |                |                              |                                   |                     |      |    |   |
|-----------------|---|---|---|---|----|---|---|---|--------|--------|--------|--------|---------|----------------|------------------------------|-----------------------------------|---------------------|------|----|---|
| K10B3.7         | 2 | 1 | 0 | 1 | 2  | 1 | 0 | 1 | 9.10%  | 4.10%  | 0      | 4.10%  | CE07370 | WBGene00001685 | locus:gpd-3                  | status:Confirmed                  | SW:P17330           | 2    | 2  |   |
| K10B3.8         | 2 | 1 | 0 | 1 | 2  | 1 | 0 | 1 | 9.10%  | 4.10%  | 0      | 4.10%  | CE07371 | WBGene00001684 | locus:gpd-2                  | status:Confirmed                  | SW:P17329           | 2    | 2  |   |
| C53D5.6         | 2 | 1 | 0 | 1 | 2  | 1 | 0 | 1 | 3.10%  | 1.60%  | 0      | 1.60%  | CE26971 | WBGene00002077 | locus:imb-3                  | importin beta, nuclear transport  |                     | 2    | 2  |   |
| ZK1098.10c      | 1 | 1 | 0 | 1 | 2  | 1 | 0 | 1 | 3.10%  | 3.10%  | 0      | 3.10%  | CE41490 | WBGene00006755 | locus:unc-16                 | status:Confirmed                  |                     | 2    | 2  |   |
| Y57G11C.16      | 1 | 1 | 1 | 1 | 1  | 1 | 1 | 1 | 5.20%  | 7.80%  | 7.80%  | 7.80%  | CE14956 | WBGene00004487 | locus:rps-18                 | ribosomal protein S13             | status:Confirmed    | 2    | 2  |   |
| Reverse_B0213.4 | 1 | 1 | 1 | 1 | 1  | 1 | 1 | 1 | 13.70% | 13.70% | 13.70% | 13.70% | CE16775 | WBGene00003767 | locus:nlp-29                 | status:Confirmed                  | SW:O44664           | 2    | 2  |   |
| Reverse_B0213.3 | 1 | 1 | 1 | 1 | 1  | 1 | 1 | 1 | 15.40% | 15.40% | 15.40% | 15.40% | CE16774 | WBGene00003766 | locus:nlp-28                 | status:Confirmed                  | SW:O44665           | 2    | 2  |   |
| Reverse_B0213.5 | 1 | 1 | 1 | 1 | 1  | 1 | 1 | 1 | 14.50% | 14.50% | 14.50% | 14.50% | CE16776 | WBGene00003768 | locus:nlp-30                 | status:Confirmed                  | SW:O44663           | 2    | 2  |   |
| Reverse_B0213.6 | 1 | 1 | 1 | 1 | 1  | 1 | 1 | 1 | 13.30% | 13.30% | 13.30% | 13.30% | CE16777 | WBGene00003769 | locus:nlp-31                 | status:Confirmed                  | SW:O44662           | 2    | 2  |   |
| ZK353.2         | 1 | 1 | 1 | 1 | 1  | 1 | 1 | 1 | 10.10% | 10.10% | 10.10% | 10.10% | CE00386 | WBGene00022698 | status:Partially_confirmed   | SW:P34625                         | prot                | 2    | 2  |   |
| Y71F9AL.13a     | 1 | 1 | 2 | 1 | 1  | 1 | 2 | 1 | 5.60%  | 6.00%  | 11.60% | 5.60%  | CE25552 | WBGene00004412 | locus:rpl-1                  | status:Confirmed                  | SW:Q9N414           | pr   | 3  | 2 |
| C37A2.7         | 1 | 0 | 2 | 2 | 1  | 0 | 2 | 2 | 20.60% | 0      | 30.80% | 43.00% | CE30433 | WBGene00016493 | ribosomal protein            | status:Confirmed                  | SW:O0               | 3    | 2  |   |
| T08B2.10        | 1 | 1 | 2 | 0 | 1  | 2 | 2 | 0 | 14.60% | 12.30% | 26.90% | 0      | CE26948 | WBGene00004486 | locus:rps-17                 | 40S ribosomal protein S17         | sta                 | 3    | 2  |   |
| Y39B6A.20       | 0 | 0 | 3 | 2 | 0  | 0 | 3 | 2 | 0      | 0      | 17.20% | 11.10% | CE21681 | WBGene00000214 | locus:asp-1                  | peptidase (A1 pepsin family)      | st                  | 3    | 2  |   |
| ZK1098.10a      | 1 | 1 | 1 | 1 | 2  | 1 | 1 | 1 | 1.50%  | 1.50%  | 1.50%  | 1.50%  | CE00363 | WBGene00006755 | locus:unc-16                 | Coiled coil protein               | status:Conf         | 3    | 2  |   |
| ZK1098.10d      | 1 | 1 | 1 | 1 | 2  | 1 | 1 | 1 | 1.40%  | 1.40%  | 1.40%  | 1.40%  | CE41491 | WBGene00006755 | locus:unc-16                 | status:Confirmed                  |                     | 3    | 2  |   |
| ZK1098.10b      | 1 | 1 | 1 | 1 | 2  | 1 | 1 | 1 | 1.50%  | 1.50%  | 1.50%  | 1.50%  | CE31846 | WBGene00006755 | locus:unc-16                 | status:Confirmed                  | SW:P34609           | 3    | 2  |   |
| C07A12.4b       | 1 | 1 | 3 | 1 | 1  | 1 | 3 | 1 | 3.20%  | 3.20%  | 7.30%  | 3.40%  | CE31878 | WBGene00003963 | locus:pdi-2                  | status:Confirmed                  | TR:Q8IG53           | pr   | 4  | 2 |
| C07A12.4a       | 1 | 1 | 3 | 1 | 1  | 1 | 3 | 1 | 2.80%  | 2.80%  | 6.50%  | 3.00%  | CE03972 | WBGene00003963 | locus:pdi-2                  | protein disulfide isomerase       | statu               | 4    | 2  |   |
| Y113G7A.3       | 2 | 1 | 1 | 1 | 1  | 1 | 1 | 1 | 4.30%  | 2.10%  | 2.10%  | 1.60%  | CE27230 | WBGene00004754 | locus:sec-23                 | status:Confirmed                  | TR:Q9U221           | 4    | 2  |   |
| T01G1.3         | 2 | 0 | 2 | 2 | 2  | 0 | 2 | 2 | 3.30%  | 0      | 2.90%  | 3.00%  | CE16320 | WBGene00011338 | Yesat transport protein WEB1 | like                              | status:Pa           | 4    | 2  |   |
| D1007.6         | 2 | 0 | 2 | 2 | 3  | 0 | 2 | 2 | 20.10% | 0      | 18.80% | 18.80% | CE09041 | WBGene00004479 | locus:rps-10                 | 40S ribosomal protein S10         | sta                 | 5    | 2  |   |
| F42G8.12        | 2 | 0 | 2 | 2 | 3  | 0 | 2 | 2 | 9.40%  | 0      | 10.90% | 13.00% | CE17071 | WBGene00002162 | locus:isp-1                  | ubiquinol-cytochrome C reducta    |                     | 5    | 2  |   |
| Y77E11A.13b     | 2 | 1 | 2 | 1 | 2  | 1 | 3 | 1 | 11.40% | 4.70%  | 12.80% | 6.60%  | CE25615 | WBGene00003806 | locus:npp-20                 | status:Confirmed                  | TR:Q9N4A6           | 5    | 2  |   |
| T28D6.2         | 2 | 0 | 0 | 2 | 5  | 0 | 0 | 2 | 5.40%  | 0      | 0      | 8.10%  | CE16521 | WBGene00006533 | locus:tba-7                  | tubulin alpha subunit             | status:Cor          | 5    | 2  |   |
| Y77E11A.13a     | 3 | 1 | 2 | 1 | 3  | 1 | 3 | 1 | 10.90% | 3.20%  | 8.60%  | 4.50%  | CE25614 | WBGene00003806 | locus:npp-20                 | status:Confirmed                  | TR:Q9N4A7           | 6    | 2  |   |
| C47E8.5         | 4 | 0 | 2 | 1 | 4  | 1 | 2 | 1 | 8.50%  | 3.40%  | 3.40%  | 2.10%  | CE05441 | WBGene00000915 | locus:daf-21                 | heat shock protein (HSP90)        | st                  | 6    | 2  |   |
| W02D3.11b       | 3 | 1 | 2 | 1 | 3  | 0 | 3 | 2 | 11.90% | 0      | 7.50%  | 3.60%  | CE31078 | WBGene00020936 | locus:hrrf-1                 | status:Confirmed                  | TR:Q8MQG5           | 6    | 2  |   |
| ZK154.3         | 4 | 1 | 1 | 1 | 6  | 1 | 1 | 1 | 10.00% | 3.40%  | 2.30%  | 2.30%  | CE15257 | WBGene00003171 | locus:mec-7                  | beta tubulin                      | status:Partially_co | 7    | 2  |   |
| B0272.1         | 4 | 1 | 2 | 1 | 6  | 1 | 2 | 1 | 9.70%  | 3.20%  | 5.00%  | 2.30%  | CE00850 | WBGene00006538 | locus:tbb-4                  | tubulin beta chain                | status:Partial      | 8    | 2  |   |
| F44F4.11        | 4 | 0 | 1 | 2 | 8  | 0 | 1 | 2 | 12.30% | 0      | 4.00%  | 8.00%  | CE18680 | WBGene00006530 | locus:tba-4                  | tubulin alpha-2 chain             | status:Par          | 9    | 2  |   |
| Y37E3.7         | 0 | 0 | 2 | 2 | 0  | 0 | 2 | 3 | 0      | 0      | 45.90% | 45.90% | CE26658 | WBGene00004409 | locus:rla-1                  | status:Confirmed                  | SW:P91913           | pr   | 2  | 3 |
| C43E11.1        | 0 | 0 | 1 | 2 | 5  | 0 | 2 | 3 | 0      | 0      | 3.40%  | 3.40%  | CE23592 | WBGene00016601 | locus:cogc-5                 | status:Confirmed                  | TR:P91156           | 2    | 3  |   |
| C15H9.6         | 0 | 1 | 2 | 2 | 0  | 1 | 2 | 2 | 0      | 2.70%  | 5.00%  | 5.00%  | CE08177 | WBGene00002007 | locus:hsp-3                  | heat shock protein                | status:Conf         | 2    | 3  |   |
| R28D1.7         | 1 | 1 | 1 | 2 | 2  | 1 | 1 | 2 | 7.70%  | 7.70%  | 7.70%  | 26.60% | CE05747 | WBGene00004492 | locus:rps-23                 | ribosomal protein S23             | status:C            | 3    | 3  |   |
| R151.3          | 2 | 1 | 2 | 2 | 2  | 1 | 2 | 2 | 10.10% | 4.60%  | 12.00% | 12.00% | CE00744 | WBGene00004417 | locus:rpl-6                  | Ribosomal protein ML.16           | status:C            | 4    | 3  |   |
| F11C3.3         | 3 | 2 | 1 | 1 | 3  | 2 | 1 | 1 | 2.20%  | 1.20%  | 0.70%  | 0.70%  | CE09349 | WBGene00006789 | locus:unc-54                 | myosin heavy chain                | status:Pa           | 4    | 3  |   |
| F18H3.3b        | 4 | 0 | 2 | 2 | 4  | 0 | 2 | 3 | 11.30% | 0      | 6.50%  | 4.80%  | CE03230 | WBGene00003903 | locus:pab-2                  | RNA recognition motif. (aka RR    |                     | 6    | 3  |   |
| F18H3.3a        | 4 | 0 | 2 | 2 | 4  | 0 | 2 | 3 | 9.20%  | 0      | 5.30%  | 3.90%  | CE02193 | WBGene00003903 | locus:pab-2                  | poly-adenylate binding protein    |                     | 6    | 3  |   |
| W02D3.11a       | 4 | 0 | 2 | 2 | 4  | 0 | 3 | 3 | 12.40% | 0      | 4.90%  | 4.90%  | CE26020 | WBGene00020936 | locus:hrrf-1                 | status:Confirmed                  | TR:Q9B1B7           | pr   | 7  | 3 |
| K11D9.2a        | 5 | 1 | 3 | 2 | 5  | 1 | 3 | 2 | 6.20%  | 1.40%  | 4.20%  | 2.40%  | CE18884 | WBGene00004736 | locus:sca-1                  | E1-E2 ATPases                     | status:Partially    | 8    | 3  |   |
| K11D9.2b        | 5 | 1 | 3 | 2 | 5  | 1 | 3 | 2 | 6.60%  | 1.50%  | 4.40%  | 2.50%  | CE18885 | WBGene00004736 | locus:sca-1                  | E1-E2 ATPases                     | status:Partially    | 8    | 3  |   |
| Y106G6H.2b      | 6 | 1 | 2 | 2 | 7  | 1 | 2 | 2 | 10.10% | 2.60%  | 5.30%  | 4.10%  | CE36227 | WBGene00003902 | locus:pab-1                  | status:Partially_confirmed        | TR:Q                | 9    | 3  |   |
| Y47G6A.15       | 6 | 1 | 2 | 2 | 8  | 1 | 2 | 2 | 27.00% | 8.30%  | 10.80% | 12.20% | CE22105 | WBGene00021641 | status:Confirmed             | TR:Q65XX4                         | protein_id:AA       | 10   | 3  |   |
| F26D10.3        | 5 | 2 | 6 | 1 | 5  | 2 | 6 | 1 | 8.90%  | 3.80%  | 18.40% | 3.80%  | CE09682 | WBGene00002005 | locus:hsp-1                  | HSP-1 heat shock 70kd             | protein             | 11   | 3  |   |
| T23E7.2c        | 3 | 3 | 1 | 1 | 3  | 3 | 1 | 1 | 5.60%  | 6.00%  | 2.90%  | 2.90%  | CE24007 | WBGene00020732 | status:Partially_confirmed   | TR:Q9TXR9                         | prot                | 4    | 4  |   |
| F08B6.4a        | 3 | 2 | 1 | 2 | 3  | 2 | 1 | 2 | 7.40%  | 5.10%  | 2.50%  | 5.30%  | CE20658 | WBGene00006819 | locus:unc-87                 | calponin                          | status:Confirmed    | SW   | 4  | 4 |
| F08B6.4b        | 3 | 2 | 1 | 2 | 3  | 2 | 1 | 2 | 11.20% | 7.80%  | 3.70%  | 8.00%  | CE27922 | WBGene00006819 | locus:unc-87                 | status:Confirmed                  | SW:P37806           | 4    | 4  |   |
| F08B6.4c        | 3 | 2 | 1 | 2 | 3  | 2 | 1 | 2 | 7.70%  | 5.30%  | 2.60%  | 5.50%  | CE36924 | WBGene00006819 | locus:unc-87                 | status:Confirmed                  | SW:P37806           | 4    | 4  |   |
| B0336.10        | 3 | 1 | 2 | 3 | 4  | 1 | 2 | 3 | 32.10% | 7.10%  | 22.10% | 35.00% | CE00778 | WBGene00004435 | locus:rpl-23                 | status:Confirmed                  | SW:P48158           | pr   | 6  | 4 |
| Y43B11AR.4      | 3 | 0 | 3 | 4 | 3  | 0 | 3 | 4 | 13.90% | 0      | 13.10% | 17.80% | CE24278 | WBGene00004473 | locus:rps-4                  | status:Confirmed                  | SW:Q9N3X2           | 2    | 4  |   |
| K04D7.1         | 3 | 1 | 1 | 2 | 5  | 1 | 2 | 3 | 12.00% | 3.70%  | 3.70%  | 12.30% | CE06090 | WBGene00010556 | locus:rack-1                 | guanidine nucleotide-binding pr   |                     | 7    | 4  |   |
| F25H5.4         | 2 | 1 | 5 | 3 | 3  | 1 | 5 | 3 | 2.20%  | 1.40%  | 9.50%  | 7.90%  | CE15900 | WBGene00001167 | locus:eft-2                  | Elongation factor Tu family (cont |                     | 8    | 4  |   |
| C47B2.3         | 3 | 0 | 1 | 4 | 7  | 0 | 1 | 4 | 9.40%  | 0      | 4.00%  | 12.90% | CE17563 | WBGene00006529 | locus:tba-2                  | Tubulin                           | status:Confirmed    | SW:P | 8  | 4 |
| F26E4.8         | 3 | 0 | 1 | 4 | 7  | 0 | 1 | 4 | 9.40%  | 0      | 4.00%  | 12.90% | CE09692 | WBGene00006528 | locus:tba-1                  | TBA-2 tubulin alpha-2 chain       | sta                 | 8    | 4  |   |
| C34E10.6        | 5 | 1 | 2 | 3 | 8  | 1 | 2 | 3 | 10.40% | 2.60%  | 6.50%  | 9.10%  | CE29950 | WBGene00000229 | locus:atp-2                  | ATP synthase beta chain           | status              | 10   | 4  |   |
| Y55B1AR.1       | 2 | 1 | 2 | 2 | 14 | 1 | 2 | 3 | 22.60% | 15.10% | 20.50% | 29.50% | CE22493 | WBGene00002269 | locus:lec-6                  | status:Confirmed                  | TR:Q9N384           | pr   | 16 | 4 |
| C16C10.4        | 0 | 2 | 2 | 1 | 0  | 3 | 3 | 2 | 0      | 18.70% | 18.70% | 10.80% | CE01495 | WBGene00007625 | status:Confirmed             | SW:Q09250                         | protein_id:C        | 3    | 5  |   |
| R144.7a         | 3 | 3 | 0 | 2 | 3  | 3 | 0 | 2 | 4.80%  | 5.00%  | 0      | 3.70%  | CE39272 | WBGene00020097 | locus:larp-1                 | status:Partially_confirmed        | TR:C                | 3    | 5  |   |
| T23E7.2e        | 4 | 3 | 1 | 2 | 4  | 3 | 1 | 2 | 7.00%  | 5.80%  | 2.90%  | 4.40%  | CE31244 | WBGene00020732 | status:Partially_confirmed   | TR:Q8MXJ1                         | prot                | 5    | 5  |   |
| T23E7.2b        | 4 | 3 | 1 | 2 | 4  | 3 | 1 | 2 | 7.30%  | 6.00%  | 3.00%  | 4.50%  | CE14066 | WBGene00020732 | status:Partially_confirmed   | TR:O17338                         | prot                | 5    | 5  |   |
| T23E7.2a        | 4 | 3 | 1 | 2 | 4  | 3 | 1 | 2 | 6.90%  | 5.70%  | 2.80%  | 4.30%  | CE14064 | WBGene00020732 | status:Partially_confirmed   | TR:O17339                         | prot                | 5    | 5  |   |
| R107.4d         | 3 | 2 | 4 | 3 | 3  | 2 | 4 | 3 | 4.80%  | 2.90%  | 7.10%  | 5.80%  | CE37846 | WBGene00011299 | locus:ikke-1                 | status:Partially_confirmed        | TR:C                | 7    | 5  |   |

|            |    |    |    |    |    |    |    |    |        |        |        |        |         |                |                                                                            |    |    |
|------------|----|----|----|----|----|----|----|----|--------|--------|--------|--------|---------|----------------|----------------------------------------------------------------------------|----|----|
| R107.4a    | 3  | 2  | 4  | 3  | 3  | 2  | 4  | 3  | 5.20%  | 3.20%  | 7.70%  | 6.20%  | CE31817 | WBGene00011299 | locus:ikke-1 tyrosine-protein kinase status:Confirmed SW:P32742            | 7  | 5  |
| R107.4b    | 3  | 2  | 4  | 3  | 3  | 2  | 4  | 3  | 4.80%  | 2.90%  | 7.10%  | 5.70%  | CE31818 | WBGene00011299 | locus:ikke-1 status:Confirmed SW:P32742                                    | 7  | 5  |
| R107.4c    | 3  | 2  | 4  | 3  | 3  | 2  | 4  | 3  | 4.80%  | 2.90%  | 7.10%  | 5.80%  | CE31819 | WBGene00011299 | locus:ikke-1 status:Confirmed SW:P32742                                    | 7  | 5  |
| K01G5.7    | 5  | 3  | 3  | 2  | 8  | 3  | 4  | 2  | 12.90% | 9.80%  | 8.20%  | 4.90%  | CE16197 | WBGene00006536 | locus:tbb-1 tubulin beta-chain status:Confirmed SW:P32742                  | 12 | 5  |
| C54C6.2    | 5  | 3  | 3  | 2  | 8  | 3  | 4  | 2  | 13.10% | 9.90%  | 8.30%  | 5.00%  | CE33770 | WBGene0000248  | locus:ben-1 tubulin status:Partially_confirmed TR:Q95QM1                   | 12 | 5  |
| C36E8.5    | 5  | 3  | 4  | 2  | 8  | 3  | 5  | 2  | 12.90% | 9.80%  | 10.90% | 4.90%  | CE00913 | WBGene00006537 | locus:tbb-2 beta tubulin status:Confirmed SW:P32742                        | 13 | 5  |
| R144.7b    | 4  | 3  | 0  | 3  | 4  | 3  | 0  | 3  | 5.60%  | 4.00%  | 0      | 4.70%  | CE31582 | WBGene00020097 | locus:larp-1 status:Partially_confirmed TR:Q95ZV3                          | 4  | 6  |
| C02A12.4   | 3  | 1  | 1  | 3  | 4  | 2  | 1  | 4  | 17.70% | 5.70%  | 5.70%  | 13.80% | CE07828 | WBGene00003096 | locus:lys-7 status:Confirmed TR:O16202                                     | 5  | 6  |
| R07B7.2    | 3  | 2  | 4  | 4  | 4  | 2  | 4  | 4  | 7.50%  | 5.40%  | 8.90%  | 8.90%  | CE38533 | WBGene00011087 | status:Partially_confirmed TR:Q95QM1                                       | 8  | 6  |
| F12F6.6    | 5  | 3  | 2  | 3  | 8  | 3  | 3  | 3  | 7.70%  | 4.00%  | 2.50%  | 6.00%  | CE05594 | WBGene00004755 | locus:sec-24.1 Yeast hypothetical YIK9 protein status:Confirmed SW:P32742  | 11 | 6  |
| Y106G6H.2c | 7  | 1  | 3  | 4  | 8  | 1  | 3  | 5  | 13.30% | 2.60%  | 7.50%  | 9.00%  | CE36228 | WBGene00003902 | locus:pab-1 status:Confirmed TR:Q7K797                                     | 11 | 6  |
| F13B9.1b   | 6  | 1  | 2  | 3  | 9  | 1  | 3  | 5  | 5.30%  | 0.70%  | 1.90%  | 2.90%  | CE30949 | WBGene00017419 | status:Partially_confirmed TR:Q95ZV3                                       | 12 | 6  |
| F13B9.1c   | 6  | 1  | 2  | 3  | 9  | 1  | 3  | 5  | 5.30%  | 0.70%  | 1.90%  | 2.90%  | CE35469 | WBGene00017419 | status:Partially_confirmed TR:Q7JP85                                       | 12 | 6  |
| F13B9.1a   | 6  | 1  | 2  | 3  | 9  | 1  | 3  | 5  | 5.30%  | 0.70%  | 1.90%  | 2.80%  | CE37100 | WBGene00017419 | status:Partially_confirmed TR:Q19386                                       | 12 | 6  |
| Y106G6H.2a | 8  | 1  | 4  | 4  | 9  | 1  | 4  | 5  | 13.60% | 2.30%  | 9.30%  | 8.20%  | CE20412 | WBGene00003902 | locus:pab-1 RNA recognition motif. (aka RRF1) status:Confirmed SW:P32742   | 13 | 6  |
| C18A11.7b  | 10 | 4  | 3  | 2  | 14 | 4  | 4  | 2  | 38.00% | 17.60% | 16.00% | 12.70% | CE04038 | WBGene00001000 | locus:dim-1 status:Confirmed SW:Q18066                                     | 18 | 6  |
| C18A11.7a  | 10 | 4  | 3  | 2  | 14 | 4  | 4  | 2  | 19.20% | 8.90%  | 8.10%  | 6.40%  | CE27706 | WBGene00001000 | locus:dim-1 status:Confirmed SW:Q18066                                     | 18 | 6  |
| F29C12.1a  | 1  | 1  | 3  | 5  | 1  | 2  | 3  | 5  | 1.70%  | 1.70%  | 13.20% | 15.50% | CE19820 | WBGene00004120 | locus:pqn-32 status:Confirmed SW:Q9XV50                                    | 4  | 7  |
| F29C12.1b  | 1  | 1  | 3  | 5  | 1  | 2  | 3  | 5  | 1.70%  | 1.70%  | 13.20% | 15.60% | CE37902 | WBGene00004120 | locus:pqn-32 status:Confirmed TR:Q5FC36                                    | 4  | 7  |
| K12F2.1    | 4  | 5  | 3  | 3  | 4  | 5  | 3  | 3  | 2.80%  | 2.90%  | 1.90%  | 3.00%  | CE34936 | WBGene00003515 | locus:myo-3 myosin heavy chain status:Partially_confirmed TR:Q95ZV3        | 7  | 8  |
| T04C12.5   | 6  | 2  | 4  | 5  | 23 | 2  | 7  | 6  | 20.20% | 6.40%  | 20.70% | 16.50% | CE13150 | WBGene00000064 | locus:act-2 actin status:Confirmed SW:P100                                 | 30 | 8  |
| C17G10.5   | 2  | 2  | 7  | 4  | 4  | 2  | 7  | 7  | 10.80% | 10.80% | 41.30% | 22.00% | CE06846 | WBGene00003097 | locus:lys-8 status:Confirmed TR:Q09975                                     | 11 | 9  |
| M03F4.2b   | 4  | 2  | 5  | 6  | 21 | 2  | 8  | 7  | 16.60% | 7.20%  | 32.50% | 27.70% | CE28620 | WBGene00000066 | locus:act-4 status:Confirmed TR:Q95ZL1                                     | 29 | 9  |
| M03F4.2a   | 6  | 2  | 5  | 6  | 23 | 2  | 8  | 7  | 20.20% | 6.40%  | 28.70% | 24.50% | CE12358 | WBGene00000066 | locus:act-4 actin status:Confirmed SW:P100                                 | 31 | 9  |
| M03F4.2c   | 6  | 2  | 5  | 6  | 23 | 2  | 8  | 7  | 21.00% | 6.60%  | 29.80% | 25.40% | CE37134 | WBGene00000066 | locus:act-4 status:Confirmed TR:Q6A8K1                                     | 31 | 9  |
| T04C12.6   | 6  | 2  | 5  | 6  | 23 | 2  | 8  | 7  | 20.20% | 6.40%  | 28.70% | 24.50% | CE13148 | WBGene00000063 | locus:act-1 actin status:Confirmed SW:P100                                 | 31 | 9  |
| T04C12.4   | 6  | 2  | 5  | 6  | 23 | 2  | 8  | 7  | 20.20% | 6.40%  | 28.70% | 24.50% | CE13148 | WBGene00000065 | locus:act-3 actin status:Confirmed SW:P100                                 | 31 | 9  |
| R102.5b    | 6  | 3  | 5  | 4  | 20 | 5  | 7  | 6  | 17.40% | 10.70% | 14.70% | 11.20% | CE35602 | WBGene00011292 | status:Confirmed TR:Q9U389                                                 | 27 | 11 |
| F07A5.7    | 4  | 4  | 2  | 9  | 5  | 4  | 2  | 9  | 7.30%  | 5.70%  | 3.20%  | 16.60% | CE09197 | WBGene00006754 | locus:unc-15 paramyosin status:Confirmed SW:P32742                         | 7  | 13 |
| F53C11.7   | 8  | 3  | 7  | 8  | 13 | 5  | 7  | 10 | 19.70% | 10.00% | 27.60% | 29.50% | CE24997 | WBGene00009976 | locus:swan-2 Yeast hypothetical protein YP001000000                        | 20 | 15 |
| T04C10.1   | 11 | 5  | 8  | 8  | 14 | 5  | 9  | 10 | 15.20% | 7.50%  | 12.80% | 13.70% | CE33442 | WBGene00003149 | locus:mbk-1 serine/threonine kinase (2 domains) status:Confirmed SW:P32742 | 23 | 15 |
| R102.5a    | 8  | 5  | 5  | 6  | 23 | 8  | 7  | 8  | 27.60% | 20.60% | 15.20% | 21.10% | CE35601 | WBGene00011292 | status:Confirmed TR:Q21891                                                 | 30 | 16 |
| Y22F5A.4   | 4  | 5  | 7  | 5  | 23 | 9  | 12 | 7  | 20.50% | 23.80% | 23.50% | 16.10% | CE16605 | WBGene00003090 | locus:lys-1 status:Confirmed TR:O62415                                     | 35 | 16 |
| Y63D3A.5   | 13 | 4  | 13 | 7  | 26 | 5  | 23 | 12 | 22.00% | 11.30% | 18.30% | 13.80% | CE20336 | WBGene00006565 | locus:ftg-1 status:Confirmed TR:Q9U1W1                                     | 49 | 17 |
| ZC8.4b     | 30 | 12 | 10 | 11 | 38 | 14 | 11 | 13 | 18.50% | 7.70%  | 7.10%  | 8.70%  | CE38922 | WBGene00022500 | locus:ifi-1 status:Partially_confirmed TR:Q4                               | 49 | 27 |
| ZC8.4a     | 36 | 14 | 13 | 12 | 45 | 17 | 15 | 15 | 20.10% | 8.00%  | 8.10%  | 8.50%  | CE31264 | WBGene00022500 | locus:ifi-1 probable myofibrillar protein status:Confirmed SW:P32742       | 60 | 32 |
| ZC8.4d     | 37 | 14 | 12 | 12 | 46 | 17 | 14 | 15 | 21.10% | 8.10%  | 7.50%  | 8.60%  | CE35814 | WBGene00022500 | locus:ifi-1 status:Partially_confirmed TR:Q7                               | 60 | 32 |
| R07G3.3c   | 24 | 16 | 13 | 15 | 33 | 17 | 14 | 16 | 24.10% | 15.90% | 13.40% | 18.20% | CE40208 | WBGene00019940 | locus:npp-21 status:Partially_confirmed TR:Q95ZV3                          | 47 | 33 |
| R07G3.3a   | 26 | 17 | 14 | 15 | 35 | 18 | 15 | 16 | 17.80% | 11.60% | 9.50%  | 12.10% | CE37543 | WBGene00019940 | locus:npp-21 myosin heavy chain status:Partially_confirmed TR:Q95ZV3       | 50 | 34 |
| R07G3.3b   | 26 | 17 | 14 | 15 | 35 | 18 | 15 | 16 | 17.80% | 11.50% | 9.50%  | 12.10% | CE37544 | WBGene00019940 | locus:npp-21 status:Partially_confirmed TR:Q95ZV3                          | 50 | 34 |



**Table S2**

| <b>RNAi in wild-type (N2):</b> | <b>% adults in lethargus</b> | <b>n</b> |
|--------------------------------|------------------------------|----------|
| empty vector                   | 0.00%                        | 115      |
| <i>kin-3</i>                   | 0.00%                        | 89       |
| <i>kin-10</i>                  | 0.00%                        | 95       |

**Table S3**

| <b>RNAi in wild-type (N2):</b> | <b>% embryonic lethality</b> | <b>n</b> |
|--------------------------------|------------------------------|----------|
| empty vector                   | 0.20%                        | 433      |
| <i>kin-3</i>                   | 0.20%                        | 469      |
| <i>kin-10</i>                  | 0.20%                        | 431      |
| <i>alg-1</i>                   | 0.50%*                       | 411      |
| <i>nhl-2</i>                   | 0.60%*                       | 475      |
| <i>cgh-1</i>                   | 0.60%*                       | 342      |
| * p<0.0001 (Fisher's exact)    |                              |          |

**Table S4**

| miRNA             | Normalized reads per million mapped reads |                   |                    |
|-------------------|-------------------------------------------|-------------------|--------------------|
|                   | vector                                    | <i>kin-3</i> RNAi | <i>kin-10</i> RNAi |
| <i>let-7</i>      | 49,795.02                                 | 63,690.70         | 38,749.08          |
| <i>lin-58</i>     | 268,688.59                                | 271,742.44        | 270,386.06         |
| <i>lsy-6</i>      | 0.61                                      | 0.24              | 0.85               |
| <i>mir-1</i>      | 73,658.84                                 | 81,012.21         | 65,989.66          |
| <i>mir-1018</i>   | 2.47                                      | 1.15              | 2.20               |
| <i>mir-1019</i>   | 0.11                                      | 0.10              | 0.39               |
| <i>mir-1020</i>   | 1.59                                      | 1.60              | 1.31               |
| <i>mir-1022</i>   | 659.16                                    | 595.35            | 637.46             |
| <i>mir-1817</i>   | 0.15                                      | 0.04              | 0.00               |
| <i>mir-1819</i>   | 40.48                                     | 33.35             | 25.28              |
| <i>mir-1820</i>   | 2.01                                      | 1.15              | 1.62               |
| <i>mir-1821</i>   | 0.76                                      | 0.45              | 0.85               |
| <i>mir-1822</i>   | 0.19                                      | 0.52              | 0.31               |
| <i>mir-1823</i>   | 0.19                                      | 0.07              | 0.08               |
| <i>mir-1824</i>   | 1.14                                      | 1.56              | 0.97               |
| <i>mir-1828</i>   | 0.00                                      | 0.00              | 0.00               |
| <i>mir-1829.2</i> | 110.01                                    | 69.58             | 77.61              |
| <i>mir-1830</i>   | 0.80                                      | 1.87              | 0.70               |
| <i>mir-1834</i>   | 1.18                                      | 1.01              | 0.89               |
| <i>mir-2207</i>   | 0.15                                      | 0.10              | 0.00               |
| <i>mir-2208.2</i> | 0.53                                      | 0.52              | 0.35               |
| <i>mir-2209.1</i> | 7.28                                      | 5.52              | 5.10               |
| <i>mir-2209.2</i> | 0.00                                      | 0.04              | 0.00               |
| <i>mir-2209.3</i> | 0.00                                      | 0.04              | 0.04               |
| <i>mir-2210</i>   | 0.30                                      | 0.45              | 0.54               |
| <i>mir-2211</i>   | 1.02                                      | 0.97              | 0.73               |
| <i>mir-2212</i>   | 4.17                                      | 4.51              | 4.06               |
| <i>mir-2213</i>   | 0.30                                      | 0.17              | 0.16               |
| <i>mir-2216</i>   | 0.53                                      | 0.45              | 0.54               |
| <i>mir-2219</i>   | 0.38                                      | 0.24              | 0.27               |
| <i>mir-2220</i>   | 0.11                                      | 0.07              | 0.16               |
| <i>mir-228</i>    | 10,911.28                                 | 8,888.95          | 9,202.60           |
| <i>mir-229</i>    | 76.02                                     | 79.40             | 61.76              |
| <i>mir-230</i>    | 883.70                                    | 573.97            | 882.77             |
| <i>mir-231</i>    | 26.48                                     | 26.13             | 27.79              |
| <i>mir-232</i>    | 4.93                                      | 6.94              | 6.11               |
| <i>mir-235</i>    | 364.48                                    | 282.23            | 112.09             |
| <i>mir-237</i>    | 94.42                                     | 103.31            | 79.43              |
| <i>mir-238</i>    | 138.54                                    | 127.08            | 89.90              |

|           |           |           |          |
|-----------|-----------|-----------|----------|
| mir-239.1 | 69.04     | 77.39     | 63.66    |
| mir-239.2 | 109.52    | 63.44     | 38.69    |
| mir-240   | 23.60     | 24.50     | 7.69     |
| mir-241   | 10,173.44 | 10,289.80 | 9,281.79 |
| mir-242   | 3.98      | 3.75      | 4.10     |
| mir-243   | 8.31      | 10.27     | 10.78    |
| mir-244   | 11.27     | 16.24     | 7.89     |
| mir-245   | 3.11      | 2.46      | 2.28     |
| mir-246   | 11.19     | 12.67     | 7.11     |
| mir-247   | 1.90      | 0.97      | 1.86     |
| mir-248   | 66.31     | 70.90     | 67.72    |
| mir-249   | 0.30      | 0.28      | 0.46     |
| mir-251   | 15.74     | 10.03     | 7.34     |
| mir-252   | 299.08    | 298.78    | 211.61   |
| mir-259   | 2.01      | 1.98      | 1.51     |
| mir-260   | 0.38      | 0.21      | 0.23     |
| mir-262   | 0.19      | 0.04      | 0.19     |
| mir-265   | 0.11      | 0.00      | 0.00     |
| mir-34    | 2,436.66  | 2,547.27  | 2,759.50 |
| mir-35    | 239.22    | 242.67    | 190.16   |
| mir-355   | 0.04      | 0.07      | 0.04     |
| mir-356   | 0.15      | 0.04      | 0.12     |
| mir-359   | 0.27      | 0.42      | 0.08     |
| mir-36    | 42.75     | 47.82     | 43.29    |
| mir-360   | 0.04      | 0.04      | 0.00     |
| mir-37    | 719.97    | 787.98    | 659.22   |
| mir-392   | 0.27      | 0.28      | 0.12     |
| mir-40    | 79.78     | 105.43    | 82.94    |
| mir-42    | 26.86     | 36.13     | 28.49    |
| mir-43    | 5.01      | 4.23      | 4.95     |
| mir-46    | 0.30      | 0.38      | 0.35     |
| mir-47    | 9.29      | 13.92     | 6.88     |
| mir-49    | 83.27     | 93.45     | 89.78    |
| mir-50    | 625.78    | 622.21    | 574.38   |
| mir-53    | 2.88      | 5.73      | 3.05     |
| mir-54    | 991.97    | 721.77    | 545.62   |
| mir-55    | 1,396.36  | 1,089.57  | 989.21   |
| mir-56    | 853.47    | 782.67    | 644.99   |
| mir-57    | 1,711.18  | 1,010.31  | 1,832.21 |
| mir-59    | 20.18     | 28.77     | 21.03    |
| mir-60    | 27.39     | 30.85     | 32.00    |
| mir-61    | 351.43    | 244.96    | 252.97   |
| mir-63    | 263.12    | 321.93    | 286.94   |

|         |           |           |           |
|---------|-----------|-----------|-----------|
| mir-64  | 248.67    | 287.78    | 261.39    |
| mir-65  | 149.47    | 242.78    | 192.17    |
| mir-72  | 24,746.19 | 19,737.11 | 22,788.62 |
| mir-73  | 16,717.42 | 14,438.91 | 14,659.61 |
| mir-74  | 16.20     | 26.76     | 13.88     |
| mir-75  | 532.38    | 711.95    | 560.20    |
| mir-76  | 5.39      | 3.68      | 4.41      |
| mir-77  | 13.88     | 26.24     | 16.50     |
| mir-78  | 0.00      | 0.00      | 0.00      |
| mir-784 | 1.67      | 2.71      | 1.01      |
| mir-785 | 21.70     | 19.54     | 14.15     |
| mir-786 | 7.28      | 9.27      | 4.95      |
| mir-787 | 22.53     | 20.96     | 18.51     |
| mir-788 | 64.83     | 46.64     | 35.17     |
| mir-79  | 17.64     | 58.06     | 52.80     |
| mir-790 | 7.89      | 5.21      | 4.91      |
| mir-791 | 16.27     | 12.46     | 12.06     |
| mir-792 | 0.65      | 0.38      | 0.08      |
| mir-793 | 18.17     | 14.05     | 12.87     |
| mir-794 | 2.77      | 2.67      | 2.94      |
| mir-795 | 540.50    | 398.03    | 498.20    |
| mir-796 | 40.40     | 32.72     | 29.41     |
| mir-797 | 3.64      | 2.60      | 4.48      |
| mir-798 | 4.06      | 3.37      | 1.51      |
| mir-800 | 0.08      | 0.28      | 0.19      |
| mir-84  | 305.87    | 302.32    | 242.84    |
| mir-85  | 88.54     | 78.25     | 41.12     |
| mir-90  | 197.91    | 158.21    | 191.09    |

Table S5

| Instrument | Filtering parameter                                                                |
|------------|------------------------------------------------------------------------------------|
| LTD        | -p 1 -y 1 --trypstat --pfp 0.01 --modstat --extra --pl --DB --dm -in --brief --qil |

| Accession      | Mass spectrometry of CGH-1 complexes |          |                 |           |                   |               |  |                                      | Protein |
|----------------|--------------------------------------|----------|-----------------|-----------|-------------------|---------------|--|--------------------------------------|---------|
|                | Peptide counts                       |          | Spectral counts |           | Sequence coverage |               |  |                                      |         |
|                | Adult                                | L3       | Adult           | L3        | Adult             | L3            |  |                                      |         |
| C07H6.5        | 12                                   | 12       | 21              | 19        | 22.80%            | 25.10%        |  | CGH-1                                |         |
| <b>B0205.7</b> | <b>7</b>                             | <b>9</b> | <b>11</b>       | <b>13</b> | <b>19.40%</b>     | <b>21.40%</b> |  | <b>KIN-3</b>                         |         |
| <b>T01G9.6</b> | <b>3</b>                             | <b>4</b> | <b>4</b>        | <b>6</b>  | <b>15.80%</b>     | <b>26.50%</b> |  | <b>KIN-10</b>                        |         |
| F56D12.5       | 0                                    | 3        | 0               | 4         | 0                 | 14.30%        |  | VIG-1                                |         |
| F26F4.7        | 0                                    | 2        | 0               | 2         | 0                 | 4.50%         |  | NHL-2                                |         |
| C06G1.4        | 0                                    | 1        | 0               | 1         | 0                 | 2.20%         |  | AIN-1                                |         |
| Y105C5B.28b    | 62                                   | 124      | 188             | 510       | 48.10%            | 75.10%        |  | CE39807 WBGene00001604 locus:gl      |         |
| Y105C5B.28a    | 62                                   | 124      | 188             | 510       | 47.70%            | 74.50%        |  | CE24078 WBGene00001604 locus:gl      |         |
| C27D11.1       | 37                                   | 98       | 55              | 161       | 29.00%            | 55.20%        |  | CE00543 WBGene00001209 locus:egl     |         |
| C43E11.1       | 36                                   | 71       | 60              | 136       | 39.10%            | 54.10%        |  | CE23592 WBGene00016601 locus:cog     |         |
| H27M09.1       | 34                                   | 63       | 56              | 99        | 36.00%            | 56.00%        |  | CE23832 WBGene00019245 helicase s    |         |
| Y111B2A.18     | 13                                   | 30       | 29              | 117       | 31.00%            | 56.20%        |  | CE31089 WBGene00004700 locus:rsp     |         |
| R186.7         | 27                                   | 34       | 61              | 82        | 41.50%            | 62.10%        |  | CE27772 WBGene00011308 status:Co     |         |
| F46G10.1a      | 5                                    | 36       | 5               | 108       | 34.80%            | 87.10%        |  | CE41319 WBGene00009796 status:Co     |         |
| Y106G6H.2a     | 18                                   | 35       | 32              | 64        | 23.40%            | 44.10%        |  | CE20412 WBGene00003902 locus:pab     |         |
| Y106G6H.2b     | 18                                   | 32       | 32              | 60        | 25.90%            | 43.90%        |  | CE36227 WBGene00003902 locus:pab     |         |
| Y106G6H.2c     | 14                                   | 29       | 28              | 54        | 20.80%            | 40.40%        |  | CE36228 WBGene00003902 locus:pab     |         |
| C17G10.9a      | 11                                   | 40       | 16              | 63        | 15.50%            | 48.60%        |  | CE27702 WBGene00015920 status:Par    |         |
| Y54E2A.11a     | 11                                   | 41       | 16              | 63        | 12.40%            | 40.70%        |  | CE20310 WBGene00001225 locus:eif-3   |         |
| C17G10.9b      | 11                                   | 38       | 16              | 62        | 15.50%            | 48.40%        |  | CE30870 WBGene00015920 status:Par    |         |
| C16C10.4       | 6                                    | 22       | 14              | 56        | 26.50%            | 63.30%        |  | CE01495 WBGene00007625 status:Co     |         |
| K08F11.3       | 10                                   | 29       | 13              | 54        | 22.30%            | 49.20%        |  | CE11954 WBGene00019543 locus:cif-1   |         |
| K07H8.6c       | 44                                   | 0        | 64              | 0         | 24.00%            | 0             |  | CE18026 WBGene00006930 locus:vif-1   |         |
| K07H8.6a       | 44                                   | 0        | 64              | 0         | 24.10%            | 0             |  | CE28594 WBGene00006930 locus:vif-1   |         |
| M03F4.2a       | 16                                   | 17       | 32              | 26        | 26.60%            | 33.00%        |  | CE12358 WBGene00000066 locus:act-    |         |
| F26D10.3       | 20                                   | 22       | 33              | 25        | 34.20%            | 32.20%        |  | CE09682 WBGene00002005 locus:hsp     |         |
| T04C12.6       | 16                                   | 17       | 32              | 26        | 26.60%            | 33.00%        |  | CE13148 WBGene00000063 locus:act-    |         |
| T04C12.5       | 16                                   | 17       | 32              | 26        | 26.60%            | 33.00%        |  | CE13150 WBGene00000064 locus:act-    |         |
| T04C12.4       | 16                                   | 17       | 32              | 26        | 26.60%            | 33.00%        |  | CE13148 WBGene00000065 locus:act-    |         |
| Y47G6A.20b     | 11                                   | 28       | 13              | 44        | 13.90%            | 30.80%        |  | CE24366 WBGene00004389 locus:mp-     |         |
| C41D11.2       | 11                                   | 20       | 14              | 42        | 23.80%            | 34.50%        |  | CE29220 WBGene00001231 locus:eif-3   |         |
| Y65B4A.6       | 7                                    | 31       | 10              | 45        | 18.00%            | 39.80%        |  | CE34419 WBGene00022029 status:Par    |         |
| F33D11.10      | 7                                    | 31       | 10              | 45        | 18.00%            | 39.80%        |  | CE09901 WBGene00018007 initiation fe |         |
| F22B5.2        | 9                                    | 21       | 13              | 41        | 35.90%            | 68.80%        |  | CE02197 WBGene00001230 locus:eif-3   |         |
| Y74C10AR.1     | 12                                   | 19       | 18              | 34        | 29.70%            | 45.60%        |  | CE30325 WBGene00001232 locus:eif-3   |         |
| M03F4.2c       | 12                                   | 13       | 28              | 22        | 24.00%            | 30.70%        |  | CE37134 WBGene00000066 locus:act-    |         |
| F45E4.2        | 13                                   | 22       | 17              | 33        | 0.531             | 0.717         |  | CE10494 WBGene00004046 locus:plp-    |         |
| B0001.1        | 14                                   | 15       | 28              | 21        | 31.40%            | 38.00%        |  | CE32786 WBGene00003010 locus:lin-2   |         |
| T10F2.4        | 11                                   | 19       | 16              | 32        | 22.20%            | 38.80%        |  | CE38104 WBGene00020423 status:Par    |         |
| W08E12.7       | 7                                    | 19       | 14              | 33        | 14.30%            | 37.90%        |  | CE21275 WBGene00021088 peptidase     |         |
| B0511.10       | 6                                    | 18       | 8               | 38        | 15.00%            | 33.10%        |  | CE17349 WBGene00001228 locus:eif-3   |         |
| Y47G6A.20a     | 5                                    | 21       | 7               | 36        | 15.00%            | 40.40%        |  | CE24365 WBGene00004389 locus:mp-     |         |
| Y62H9A.6       | 27                                   | 0        | 42              | 0         | 59.70%            | 0             |  | CE19242 WBGene00013394 status:Co     |         |
| H06H21.3       | 6                                    | 11       | 10              | 29        | 27.30%            | 28.20%        |  | CE17962 WBGene00019162 translator    |         |
| Y47G6A.20c     | 4                                    | 19       | 6               | 33        | 8.10%             | 32.90%        |  | CE31375 WBGene00004389 locus:mp-     |         |
| M03F4.2b       | 10                                   | 11       | 21              | 17        | 22.90%            | 30.10%        |  | CE28620 WBGene00000066 locus:act-    |         |
| B0252.4b       | 7                                    | 12       | 8               | 30        | 37.90%            | 57.10%        |  | CE27567 WBGene00000886 locus:cyn-    |         |
| T16G1.11       | 3                                    | 20       | 5               | 33        | 13.80%            | 47.90%        |  | CE20081 WBGene00001233 locus:eif-3   |         |
| D2013.7        | 7                                    | 12       | 9               | 28        | 18.40%            | 27.20%        |  | CE00932 WBGene00001229 locus:eif-3   |         |
| ZC247.1        | 4                                    | 21       | 5               | 32        | 1.20%             | 4.90%         |  | CE39535 WBGene00013859 status:Par    |         |
| T25C8.2        | 11                                   | 13       | 20              | 17        | 15.70%            | 25.60%        |  | CE16463 WBGene00000067 locus:act-    |         |
| B0252.4a       | 5                                    | 11       | 5               | 29        | 32.00%            | 53.10%        |  | CE02420 WBGene00000886 locus:cyn-    |         |
| R07E5.14       | 8                                    | 13       | 12              | 22        | 45.80%            | 60.60%        |  | CE01044 WBGene00004387 locus:mp-     |         |
| B0041.4        | 2                                    | 25       | 4               | 29        | 7.80%             | 43.50%        |  | CE07669 WBGene00004415 locus:rpl-4   |         |
| R08D7.3        | 3                                    | 17       | 5               | 27        | 3.20%             | 26.10%        |  | CE00291 WBGene00001227 locus:eif-3   |         |
| C56C10.8       | 8                                    | 7        | 12              | 20        | 36.60%            | 37.90%        |  | CE02573 WBGene00002045 locus:icd-    |         |
| Y67D2.6        | 10                                   | 16       | 11              | 20        | 14.10%            | 24.90%        |  | CE27311 WBGene00022056 status:Par    |         |
| C09F9.3        | 14                                   | 9        | 19              | 12        | 15.00%            | 10.00%        |  | CE40799 WBGene00007480 Ank repe      |         |
| R09B3.5        | 5                                    | 13       | 8               | 23        | 42.80%            | 52.00%        |  | CE16310 WBGene00003123 locus:maq     |         |
| Y66D12A.8      | 11                                   | 8        | 17              | 13        | 38.90%            | 34.80%        |  | CE28806 WBGene00013434 status:Par    |         |
| Y43B11AR.4     | 1                                    | 22       | 1               | 28        | 3.50%             | 58.30%        |  | CE24278 WBGene00004473 locus:rps-    |         |
| T27F2.1        | 10                                   | 12       | 13              | 16        | 20.70%            | 22.80%        |  | CE06519 WBGene00004806 locus:skp-    |         |
| C42D8.2a       | 19                                   | 0        | 28              | 0         | 14.40%            | 0             |  | CE06950 WBGene00006926 locus:vif-2   |         |
| F35F11.1       | 10                                   | 11       | 12              | 16        | 18.90%            | 23.70%        |  | CE37230 WBGene00018064 status:Par    |         |
| F25H5.4        | 2                                    | 18       | 2               | 25        | 2.70%             | 27.30%        |  | CE15900 WBGene00001167 locus:eff-2   |         |
| C42D8.2b       | 18                                   | 0        | 26              | 0         | 13.90%            | 0             |  | CE41109 WBGene00006926 locus:vif-2   |         |
| F18H3.3b       | 6                                    | 14       | 10              | 16        | 6.00%             | 22.10%        |  | CE03230 WBGene00003903 locus:pab     |         |
| F18H3.3a       | 6                                    | 14       | 10              | 16        | 4.90%             | 18.10%        |  | CE02193 WBGene00003903 locus:pab     |         |
| F56F3.5        | 2                                    | 13       | 2               | 22        | 8.90%             | 43.60%        |  | CE00664 WBGene00004470 locus:rps-    |         |
| Y69A2AR.21     | 4                                    | 11       | 6               | 18        | 19.50%            | 57.40%        |  | CE27517 WBGene00022092 status:Co     |         |
| F25H2.10       | 2                                    | 18       | 4               | 20        | 10.30%            | 44.60%        |  | CE09655 WBGene00004408 locus:rpa-    |         |
| F40F11.1       | 1                                    | 13       | 1               | 23        | 0.065             | 0.587         |  | CE05860 WBGene00004480 locus:rps-    |         |
| F46B6.5b       | 12                                   | 8        | 15              | 9         | 15.60%            | 14.10%        |  | CE33789 WBGene00009770 status:Par    |         |

|            |    |    |    |    |        |        |                                    |
|------------|----|----|----|----|--------|--------|------------------------------------|
| F46B6.5a   | 12 | 8  | 15 | 9  | 14.90% | 13.40% | CE33788 WBGene00009770 status:Par  |
| F46B6.5c   | 12 | 8  | 15 | 9  | 15.80% | 14.20% | CE34023 WBGene00009770 status:Par  |
| C49H3.11   | 2  | 13 | 3  | 21 | 7.00%  | 34.20% | CE04237 WBGene00004471 locus:rsp-  |
| T25F10.6a  | 7  | 12 | 11 | 13 | 23.90% | 40.90% | CE07537 WBGene00020808 calponin-I  |
| K09F5.2    | 15 | 0  | 22 | 0  | 12.10% | 0      | CE04746 WBGene00006925 locus:vif-1 |
| W03H9.4    | 9  | 10 | 11 | 11 | 18.70% | 16.00% | CE20137 WBGene00012230 status:Par  |
| Y39G10AR.8 | 4  | 13 | 6  | 15 | 11.70% | 30.90% | CE27254 WBGene00021466 status:Co   |
| Y92H12BR.7 | 3  | 15 | 3  | 18 | 5.60%  | 26.80% | CE39076 WBGene00022372 status:Par  |
| W02B12.3a  | 3  | 6  | 5  | 16 | 9.30%  | 20.80% | CE03763 WBGene00004698 locus:rsp-  |
| F43G9.5    | 4  | 8  | 9  | 12 | 16.70% | 37.00% | CE10362 WBGene00009668 status:Co   |
| R03G5.1a   | 5  | 11 | 5  | 15 | 8.90%  | 17.70% | CE01270 WBGene00001169 locus:eft-4 |
| F08B6.4b   | 9  | 8  | 11 | 9  | 32.60% | 25.40% | CE27922 WBGene00006819 locus:unc   |
| F54E7.2    | 3  | 8  | 5  | 15 | 28.60% | 52.90% | CE26896 WBGene00004481 locus:rsp-  |
| B0350.2f   | 7  | 8  | 10 | 10 | 1.60%  | 2.30%  | CE31847 WBGene00006780 locus:unc   |
| F31E3.5    | 5  | 11 | 5  | 15 | 8.90%  | 17.70% | CE01270 WBGene00001168 locus:eft-3 |
| F11C3.3    | 4  | 12 | 6  | 14 | 3.00%  | 9.60%  | CE09349 WBGene00006789 locus:unc   |
| T01C3.7    | 6  | 7  | 7  | 13 | 11.60% | 21.00% | CE12920 WBGene00001423 locus:fib-1 |
| C44B12.5   | 9  | 0  | 19 | 0  | 18.40% | 0      | CE16921 WBGene00016638 status:Par  |
| F08B6.4a   | 8  | 8  | 10 | 9  | 18.40% | 16.80% | CE20658 WBGene00006819 locus:unc   |
| F08B6.4c   | 8  | 8  | 10 | 9  | 19.10% | 17.50% | CE36924 WBGene00006819 locus:unc   |
| C30B5.4    | 4  | 9  | 6  | 13 | 18.20% | 26.50% | CE02523 WBGene00016245 Probable    |
| DH11.1     | 7  | 8  | 9  | 10 | 10.40% | 19.00% | CE28902 WBGene00008435 glutamina   |
| Y105E8B.1a | 3  | 14 | 3  | 16 | 16.20% | 54.20% | CE28782 WBGene00002978 locus:lev-  |
| ZK652.4    | 3  | 9  | 4  | 15 | 26.00% | 35.80% | CE00450 WBGene00004449 locus:rpl-3 |
| T07F10.3   | 2  | 11 | 2  | 17 | 9.20%  | 29.10% | CE40238 WBGene00011589 polyadeny   |
| W02B12.2   | 2  | 10 | 4  | 15 | 9.60%  | 32.40% | CE03762 WBGene00004699 locus:rsp-  |
| T25F10.6b  | 5  | 9  | 9  | 10 | 23.90% | 39.20% | CE37049 WBGene00020808 status:Co   |
| T23D8.4    | 0  | 16 | 0  | 19 | 0      | 20.80% | CE18958 WBGene00001226 locus:eif-3 |
| C50C3.6    | 3  | 11 | 6  | 12 | 1.90%  | 7.20%  | CE00122 WBGene00004187 locus:prp-  |
| C25A1.6    | 5  | 6  | 9  | 9  | 51.60% | 39.10% | CE27803 WBGene00007708 status:Co   |
| F54C9.5    | 4  | 10 | 5  | 13 | 11.30% | 42.30% | CE02255 WBGene00004416 locus:rpl-4 |
| C18A11.7b  | 4  | 9  | 5  | 13 | 15.40% | 40.70% | CE04038 WBGene00001000 locus:dim   |
| C18A11.7a  | 4  | 9  | 5  | 13 | 7.80%  | 20.60% | CE27706 WBGene00001000 locus:dim   |
| Y105E8B.1d | 3  | 13 | 3  | 15 | 16.20% | 48.90% | CE29060 WBGene00002978 locus:lev-  |
| W02B12.3c  | 3  | 5  | 5  | 13 | 19.30% | 36.00% | CE32945 WBGene00004698 locus:rsp-  |
| W02B12.3b  | 3  | 5  | 5  | 13 | 19.60% | 36.50% | CE32944 WBGene00004698 locus:rsp-  |
| C18D11.4   | 2  | 12 | 2  | 16 | 9.10%  | 35.00% | CE18515 WBGene00004705 locus:rsp-  |
| ZK328.2    | 2  | 14 | 2  | 16 | 3.00%  | 18.20% | CE05066 WBGene00001166 locus:eft-1 |
| F57B9.2    | 10 | 4  | 13 | 5  | 5.00%  | 2.00%  | CE01337 WBGene00002845 locus:let-7 |
| W02F12.6   | 5  | 8  | 6  | 11 | 24.70% | 38.20% | CE31084 WBGene00020951 locus:sna   |
| Y57G11C.9b | 1  | 12 | 1  | 16 | 3.40%  | 20.20% | CE40537 WBGene00013307 status:Co   |
| Y57G11C.9a | 1  | 12 | 1  | 16 | 3.80%  | 22.80% | CE24476 WBGene00013307 RNA reco    |
| T27F7.3b   | 1  | 9  | 1  | 16 | 9.20%  | 56.00% | CE27214 WBGene00020868 status:Co   |
| F42C5.8    | 4  | 6  | 9  | 8  | 29.30% | 41.30% | CE04561 WBGene00004477 locus:rsp-  |
| F10B5.1    | 3  | 9  | 4  | 12 | 16.80% | 31.80% | CE01543 WBGene00004421 locus:rpl-7 |
| Y48A6B.3   | 4  | 5  | 8  | 8  | 19.00% | 46.60% | CE19186 WBGene00012964 Ribosome    |
| F25H2.2    | 7  | 7  | 9  | 7  | 12.10% | 18.00% | CE09647 WBGene00009116 Phosphati   |
| D1054.15   | 3  | 11 | 4  | 12 | 7.90%  | 25.70% | CE05533 WBGene00006481 locus:tag-  |
| K04C2.2    | 2  | 10 | 2  | 14 | 2.90%  | 12.60% | CE00722 WBGene00019380 status:Par  |
| Y66D12A.9  | 1  | 9  | 1  | 15 | 8.10%  | 32.70% | CE28807 WBGene00013435 status:Co   |
| ZK418.9a   | 3  | 10 | 3  | 13 | 7.40%  | 28.90% | CE28190 WBGene00022738 possible F  |
| ZK617.1b   | 1  | 15 | 1  | 15 | 0.20%  | 3.20%  |                                    |
| ZK617.1c   | 1  | 15 | 1  | 15 | 0.20%  | 3.40%  | CE40796 WBGene00006759 locus:unc   |
| ZK617.1a   | 1  | 15 | 1  | 15 | 0.20%  | 3.30%  |                                    |
| B0250.1    | 2  | 10 | 3  | 13 | 10.40% | 41.50% | CE18478 WBGene00004413 locus:rpl-2 |
| T13F2.7    | 1  | 10 | 2  | 13 | 2.00%  | 18.60% | CE13631 WBGene00011747 locus:sna   |
| F02E9.10c  | 3  | 9  | 5  | 10 | 8.80%  | 23.50% | CE41213 WBGene00008533 status:Co   |
| C37A2.7    | 1  | 11 | 1  | 14 | 21.50% | 83.20% | CE30433 WBGene00016493 ribosoma    |
| ZK643.5    | 4  | 8  | 4  | 11 | 11.90% | 19.70% | CE24732 WBGene00014036 status:Par  |
| Y67D2.7    | 3  | 6  | 6  | 9  | 11.10% | 20.90% | CE39062 WBGene00022057 status:Co   |
| C14B9.7    | 2  | 9  | 3  | 12 | 6.20%  | 39.10% | CE00078 WBGene00004433 locus:rpl-2 |
| Y54F10BM.2 | 0  | 13 | 0  | 15 | 0      | 12.20% | CE27011 WBGene00021857 locus:iffb- |
| Y66H1A.4   | 5  | 5  | 8  | 7  | 12.30% | 28.30% | CE36757 WBGene00022046 nucleolar   |
| C47E8.5    | 2  | 8  | 4  | 11 | 5.60%  | 17.70% | CE05441 WBGene00000915 locus:daf-  |
| ZK418.9b   | 3  | 9  | 3  | 12 | 8.00%  | 26.90% | CE34457 WBGene00022738 status:Co   |
| C27A2.2a   | 3  | 9  | 4  | 11 | 24.60% | 63.10% | CE04102 WBGene00004434 locus:rpl-2 |
| M01F1.2    | 1  | 9  | 1  | 14 | 4.50%  | 34.20% | CE01030 WBGene00004428 locus:rpl-7 |
| K09H9.6    | 4  | 6  | 7  | 7  | 7.90%  | 12.70% | CE37030 WBGene00003062 locus:lpd-  |
| K02F2.2    | 1  | 8  | 1  | 13 | 3.40%  | 24.00% | CE17154 WBGene00019322 S-adenos    |
| R07B7.3    | 9  | 4  | 10 | 4  | 27.00% | 11.30% | CE06265 WBGene00004138 locus:pgn   |
| F02E9.10a  | 3  | 8  | 5  | 9  | 8.90%  | 18.40% | CE27119 WBGene00008533 status:Co   |
| F02E9.10b  | 3  | 8  | 5  | 9  | 10.30% | 21.40% | CE38314 WBGene00008533 status:Co   |
| F13B10.2a  | 3  | 8  | 4  | 10 | 9.70%  | 20.90% | CE05598 WBGene00004414 locus:rpl-2 |
| Y62H9A.5   | 7  | 0  | 14 | 0  | 21.80% | 0      | CE31124 WBGene00013393 status:Co   |
| Y24D9A.4a  | 3  | 7  | 3  | 11 | 7.20%  | 26.40% | CE27398 WBGene00004419 locus:rpl-7 |
| W08D2.7    | 5  | 7  | 6  | 8  | 5.40%  | 9.60%  | CE06562 WBGene00012342 locus:mtr-  |
| R03G5.1d   | 4  | 8  | 4  | 10 | 7.70%  | 14.50% | CE33155 WBGene00001169 locus:eft-4 |
| Y71H2AM.1  | 1  | 9  | 1  | 13 | 3.00%  | 28.50% | CE37451 WBGene00022166 status:Co   |
| F46F11.2   | 10 | 1  | 12 | 2  | 44.60% | 6.00%  | CE10598 WBGene00000473 locus:cey-  |
| C50F2.3    | 4  | 8  | 6  | 8  | 6.30%  | 12.90% | CE08909 WBGene00016837 status:Par  |
| F43D2.1    | 0  | 9  | 0  | 14 | 0      | 34.50% | CE38186 WBGene00009650 G1V5-spe    |

|             |   |    |    |    |        |        |         |                |             |
|-------------|---|----|----|----|--------|--------|---------|----------------|-------------|
| F33G12.2    | 4 | 6  | 5  | 9  | 21.30% | 21.00% | CE27149 | WBGene00018014 | status:Pa   |
| F58B3.7     | 3 | 10 | 3  | 11 | 11.30% | 29.90% | CE06009 | WBGene00010233 | Arabidops   |
| C33H5.12c   | 1 | 4  | 2  | 12 | 8.50%  | 44.10% | CE29698 | WBGene00004703 | locus:rsp-  |
| C33H5.12b   | 1 | 4  | 2  | 12 | 6.50%  | 34.00% | CE29697 | WBGene00004703 | locus:rsp-  |
| C33H5.12a   | 1 | 4  | 2  | 12 | 5.60%  | 29.10% | CE04155 | WBGene00004703 | locus:rsp-  |
| K07C5.4     | 2 | 7  | 4  | 10 | 4.30%  | 18.90% | CE06114 | WBGene00010627 | yeast pro   |
| Y116A8C.35  | 2 | 10 | 2  | 12 | 7.70%  | 32.30% | CE23341 | WBGene00006698 | locus:uaf-  |
| F13B10.2c   | 3 | 7  | 4  | 9  | 11.00% | 19.30% | CE36996 | WBGene00004414 | locus:rpl-  |
| C36E8.5     | 2 | 10 | 2  | 11 | 6.00%  | 24.00% | CE00913 | WBGene00006537 | locus:tbb-  |
| Y24D9A.4c   | 3 | 6  | 3  | 10 | 7.80%  | 23.30% | CE30401 | WBGene00004419 | locus:rpl-i |
| Y80D3A.2    | 7 | 4  | 9  | 4  | 6.60%  | 3.50%  | CE40670 | WBGene00001258 | locus:emt   |
| Y39B6A.36   | 2 | 8  | 2  | 11 | 8.40%  | 45.60% | CE29873 | WBGene00012694 | status:Co   |
| Y54E10BR.4  | 1 | 9  | 1  | 12 | 2.70%  | 19.80% | CE27481 | WBGene00021843 | status:Co   |
| D1046.1     | 3 | 8  | 4  | 9  | 7.80%  | 20.00% | CE03094 | WBGene00008362 | glycine-ric |
| M18.5       | 3 | 7  | 3  | 10 | 3.30%  | 7.10%  | CE23880 | WBGene00010890 | locus:ddb   |
| D1081.8     | 5 | 8  | 5  | 8  | 7.50%  | 13.20% | CE05540 | WBGene00008386 | MYB tran:   |
| H20J04.8    | 4 | 7  | 4  | 9  | 22.50% | 35.20% | CE20974 | WBGene00044076 | locus:sap   |
| K04D7.1     | 4 | 6  | 4  | 9  | 14.50% | 19.10% | CE06090 | WBGene00010556 | locus:rack  |
| F09E5.15    | 1 | 9  | 1  | 12 | 5.60%  | 49.70% | CE32361 | WBGene00006434 | locus:prd   |
| F43G6.8     | 1 | 8  | 1  | 12 | 6.10%  | 41.40% | CE20789 | WBGene00009660 | Zinc finge  |
| K07C5.6     | 2 | 8  | 3  | 10 | 5.10%  | 24.60% | CE06116 | WBGene00010629 | Zinc finge  |
| D2096.8     | 1 | 7  | 3  | 10 | 5.10%  | 30.40% | CE04306 | WBGene00017075 | status:Co   |
| C09D4.5     | 0 | 9  | 0  | 13 | 0      | 26.30% | CE08034 | WBGene00004431 | locus:rpl-i |
| M28.5       | 1 | 7  | 1  | 11 | 9.40%  | 43.00% | CE02283 | WBGene00010896 | ribosomal   |
| T13F2.2     | 3 | 4  | 5  | 7  | 25.80% | 19.40% | CE13621 | WBGene00011743 | single-str  |
| T13F2.8     | 7 | 2  | 9  | 3  | 31.50% | 17.90% | CE13633 | WBGene00000301 | locus:cav-  |
| Y62E10A.1   | 1 | 7  | 1  | 11 | 14.50% | 35.50% | CE22694 | WBGene00004410 | locus:rla-2 |
| Y76B12C.7   | 2 | 8  | 2  | 10 | 1.90%  | 7.80%  | CE29932 | WBGene00022301 | status:Pa   |
| F54H12.6    | 0 | 6  | 0  | 12 | 0      | 27.70% | CE00548 | WBGene00018846 | Elongatio   |
| K04G7.11    | 4 | 5  | 6  | 6  | 18.40% | 26.10% | CE39587 | WBGene00019402 | status:Co   |
| ZK829.4     | 1 | 10 | 1  | 11 | 2.40%  | 21.30% | CE06652 | WBGene00014095 | glutamate   |
| Y71F9B.4    | 4 | 4  | 6  | 6  | 41.60% | 66.20% | CE22871 | WBGene00004920 | locus:snr-  |
| Y105E8B.1b  | 1 | 9  | 1  | 11 | 5.20%  | 51.30% | CE36223 | WBGene00002978 | locus:lev-  |
| F08G12.2    | 4 | 7  | 4  | 8  | 16.60% | 23.30% | CE18578 | WBGene00008586 | WD doma     |
| T05F1.3     | 1 | 8  | 1  | 11 | 9.60%  | 56.20% | CE13265 | WBGene00004488 | locus:rps-  |
| K02F2.3     | 3 | 7  | 3  | 8  | 3.40%  | 7.20%  | CE17155 | WBGene00019323 | locus:tag-  |
| C44B12.1    | 5 | 0  | 11 | 0  | 20.70% | 0      | CE27850 | WBGene00016636 | status:Co   |
| F13B10.2d   | 3 | 6  | 4  | 7  | 12.90% | 22.80% | CE36997 | WBGene00004414 | locus:rpl-i |
| Y54E2A.11b  | 1 | 4  | 3  | 8  | 7.30%  | 30.10% | CE35681 | WBGene00001225 | locus:eif-  |
| M01E11.5    | 8 | 2  | 9  | 2  | 37.70% | 13.20% | CE12296 | WBGene00000074 | locus:cey-  |
| Y108G3AL.2  | 3 | 7  | 3  | 8  | 8.30%  | 19.00% | CE26040 | WBGene00022434 | status:Pa   |
| F37C12.4    | 3 | 7  | 3  | 8  | 21.20% | 43.30% | CE30781 | WBGene00004450 | locus:rpl-  |
| F37C12.9    | 2 | 7  | 3  | 8  | 20.40% | 50.70% | CE00821 | WBGene00004483 | locus:rps-  |
| K01G5.7     | 1 | 9  | 1  | 10 | 3.30%  | 21.40% | CE16197 | WBGene00006536 | locus:tbb-  |
| E04A4.8     | 3 | 8  | 3  | 8  | 18.30% | 32.80% | CE21392 | WBGene00004432 | locus:rpl-  |
| Y71A12B.1   | 2 | 8  | 2  | 9  | 7.30%  | 26.80% | CE24592 | WBGene00004475 | locus:rps-  |
| C15H9.6     | 4 | 7  | 4  | 7  | 0.062  | 0.163  | CE08177 | WBGene00002007 | locus:hsp   |
| Y41E3.10a   | 0 | 6  | 0  | 11 | 0      | 0.247  | CE37568 | WBGene00012768 | Elongatio   |
| C23G10.3    | 1 | 7  | 1  | 10 | 6.10%  | 31.60% | CE01810 | WBGene00004472 | locus:rps-  |
| T11G6.8     | 3 | 8  | 3  | 8  | 10.50% | 22.50% | CE33830 | WBGene00011722 | RNA reco    |
| K07H8.6b    | 6 | 0  | 10 | 0  | 25.40% | 0      | CE34921 | WBGene00006930 | locus:vit-6 |
| Y71F9AL.13a | 0 | 7  | 0  | 10 | 0      | 23.10% | CE25552 | WBGene00004412 | locus:rpl-  |
| Y65B4BR.5a  | 1 | 4  | 2  | 8  | 7.20%  | 34.40% | CE22740 | WBGene00022042 | status:Co   |
| T05E11.1    | 0 | 8  | 0  | 10 | 0      | 32.90% | CE06360 | WBGene00004474 | locus:rps-  |
| Y110A7A.6a  | 2 | 6  | 2  | 8  | 8.00%  | 20.90% | CE38000 | WBGene00022456 | phosphofi   |
| Y110A7A.6b  | 2 | 6  | 2  | 8  | 8.30%  | 21.60% | CE29606 | WBGene00022456 | status:Pa   |
| M117.2      | 2 | 6  | 2  | 8  | 10.50% | 25.80% | CE06200 | WBGene00003920 | locus:par-  |
| F25B4.5     | 1 | 7  | 1  | 9  | 1.30%  | 8.30%  | CE28000 | WBGene00017768 | status:Pa   |
| K01G5.5     | 1 | 5  | 1  | 9  | 2.70%  | 11.70% | CE16195 | WBGene00010478 | centrome    |
| F49D11.1    | 3 | 6  | 3  | 7  | 7.90%  | 15.90% | CE28405 | WBGene00018625 | locus:prp-  |
| Y23H5B.5    | 1 | 5  | 1  | 9  | 2.50%  | 14.30% | CE40876 | WBGene00021276 | status:Pa   |
| R11D1.8     | 3 | 6  | 3  | 7  | 20.60% | 25.40% | CE06313 | WBGene00004442 | locus:rpl-  |
| C34E10.6    | 0 | 9  | 0  | 10 | 0      | 25.30% | CE29950 | WBGene00000229 | locus:atp-  |
| Y65B4BR.5b  | 1 | 3  | 2  | 7  | 7.10%  | 17.30% | CE33239 | WBGene00022042 | status:Co   |
| C34D4.12    | 1 | 5  | 2  | 7  | 10.10% | 43.20% | CE17506 | WBGene00000888 | locus:cyn-  |
| W01B11.3    | 2 | 6  | 2  | 7  | 7.00%  | 18.90% | CE18307 | WBGene00020915 | status:Co   |
| F28D1.7     | 2 | 3  | 3  | 6  | 16.10% | 23.80% | CE05747 | WBGene00004492 | locus:rps-  |
| T13H5.4     | 2 | 5  | 3  | 6  | 7.00%  | 18.20% | CE23981 | WBGene00011758 | PRP9 like   |
| T20F5.7     | 0 | 8  | 0  | 9  | 0      | 32.70% | CE13828 | WBGene00020629 | status:Pa   |
| F44E5.4     | 2 | 4  | 4  | 5  | 2.00%  | 3.90%  | CE18679 | WBGene00009691 | Heat shoc   |
| F44E5.5     | 2 | 4  | 4  | 5  | 2.00%  | 3.90%  | CE18679 | WBGene00009692 | Heat shoc   |
| C04F6.1     | 6 | 0  | 9  | 0  | 5.00%  | 0      | CE03921 | WBGene00006929 | locus:vit-5 |
| C52E4.3     | 2 | 6  | 2  | 7  | 8.50%  | 46.60% | CE08945 | WBGene00004917 | locus:snr-  |
| C12C8.1     | 2 | 4  | 4  | 5  | 2.00%  | 3.90%  | CE08110 | WBGene00002026 | locus:hsp   |
| F28C6.7a    | 2 | 5  | 2  | 7  | 19.00% | 33.10% | CE03278 | WBGene00004440 | locus:rpl-  |
| F28C6.7b    | 2 | 5  | 2  | 7  | 25.50% | 44.30% | CE20731 | WBGene00004440 | locus:rpl-  |
| F28C6.7c    | 2 | 5  | 2  | 7  | 24.80% | 43.10% | CE32883 | WBGene00004440 | locus:rpl-  |
| T01C3.6     | 1 | 5  | 2  | 7  | 5.60%  | 33.30% | CE12918 | WBGene00004485 | locus:rps-  |
| Y57G11C.16  | 0 | 7  | 0  | 9  | 0      | 33.10% | CE14956 | WBGene00004487 | locus:rps-  |
| F32H2.5     | 1 | 8  | 1  | 8  | 0.80%  | 4.50%  | CE09880 | WBGene00009342 | locus:fasr  |
| C37H5.8     | 2 | 7  | 2  | 7  | 4.30%  | 15.70% | CE08631 | WBGene00002010 | locus:hsp   |



|             |   |   |   |   |        |        |                                    |
|-------------|---|---|---|---|--------|--------|------------------------------------|
| Y116A8C.34  | 3 | 6 | 3 | 6 | 13.00% | 27.80% | CE24152 WBGene0000889 locus:cyn-   |
| D2045.1a    | 2 | 7 | 2 | 7 | 3.20%  | 13.10% | CE37889 WBGene0000231 locus:atx-   |
| H06I04.4a   | 1 | 5 | 1 | 8 | 11.70% | 29.40% | CE20938 WBGene00006725 locus:ubl-  |
| Y71F9AL.13b | 0 | 5 | 0 | 8 | 0      | 24.50% | CE28379 WBGene00004412 locus:rpl-  |
| C32E8.2a    | 0 | 6 | 0 | 8 | 0      | 30.40% | CE08526 WBGene00004425 locus:rpl-  |
| Y77E11A.13a | 0 | 7 | 0 | 8 | 0      | 31.30% | CE25614 WBGene00003806 locus:npp   |
| B0336.10    | 0 | 7 | 0 | 8 | 0      | 39.30% | CE00778 WBGene00004435 locus:rpl-  |
| F46H5.3a    | 1 | 6 | 1 | 7 | 3.50%  | 16.20% | CE37112 WBGene00018519 arginine k  |
| F46H5.3b    | 1 | 6 | 1 | 7 | 3.90%  | 17.80% | CE33098 WBGene00018519 status:Co   |
| R20G5.1c    | 1 | 4 | 1 | 7 | 3.70%  | 14.20% | CE33154 WBGene00001169 locus:eft-  |
| F53G12.10   | 0 | 7 | 0 | 8 | 0      | 22.50% | CE11024 WBGene00004418 locus:rpl-  |
| F59D8.1     | 5 | 0 | 8 | 0 | 4.10%  | 0      | CE20900 WBGene00006927 locus:vit-  |
| F59D8.2     | 6 | 0 | 8 | 0 | 5.00%  | 0      | CE26817 WBGene00006928 locus:vit-  |
| Y39A1C.3    | 1 | 5 | 1 | 7 | 9.50%  | 29.60% | CE19148 WBGene00000475 locus:cey-  |
| F09G2.4     | 3 | 4 | 3 | 5 | 4.20%  | 6.30%  | CE09299 WBGene00017313 status:Co   |
| F40F8.10    | 0 | 6 | 0 | 8 | 0      | 25.90% | CE05849 WBGene00004478 locus:rps-  |
| K10B3.7     | 1 | 5 | 1 | 7 | 5.00%  | 20.50% | CE07370 WBGene00001685 locus:gpd   |
| K10B3.8     | 1 | 5 | 1 | 7 | 5.00%  | 20.50% | CE07371 WBGene00001684 locus:gpd   |
| H28O16.1a   | 1 | 6 | 1 | 7 | 2.80%  | 15.20% | CE18826 WBGene00010419 ATP synth   |
| H28O16.1d   | 1 | 6 | 1 | 7 | 2.90%  | 16.00% | CE36263 WBGene00010419 status:Co   |
| Y22D7AL.5   | 0 | 8 | 0 | 8 | 0      | 14.10% | CE27244 WBGene00002025 locus:hsp   |
| D1054.11    | 3 | 0 | 8 | 0 | 9.10%  | 0      | CE05529 WBGene00008378 status:Co   |
| C53H9.1     | 1 | 4 | 1 | 7 | 6.60%  | 24.30% | CE19381 WBGene00004441 locus:rpl-  |
| B0393.1     | 4 | 3 | 5 | 3 | 21.40% | 14.90% | CE00854 WBGene00004469 locus:rps-  |
| C54C6.6     | 3 | 3 | 4 | 4 | 18.70% | 16.70% | CE33367 WBGene00008288 DJF667 c    |
| W08E3.1     | 0 | 5 | 0 | 8 | 0      | 30.60% | CE14704 WBGene00004915 locus:snr-  |
| W08E3.2     | 3 | 5 | 3 | 5 | 11.80% | 19.20% | CE26028 WBGene00012343 status:Co   |
| T20G5.2     | 2 | 5 | 3 | 5 | 6.80%  | 13.20% | CE00513 WBGene00000833 locus:cts-  |
| VC5.3a      | 0 | 6 | 0 | 8 | 0      | 5.40%  | CE21224 WBGene00003786 locus:npa   |
| VC5.3c      | 0 | 6 | 0 | 8 | 0      | 6.50%  | CE36211 WBGene00003786 locus:npa   |
| C39E9.11    | 1 | 5 | 1 | 7 | 5.40%  | 15.10% | CE20559 WBGene00008034 status:Co   |
| Y116A8C.42  | 0 | 6 | 0 | 8 | 0      | 33.10% | CE23346 WBGene00004914 locus:snr-  |
| D2045.1b    | 2 | 6 | 2 | 6 | 4.90%  | 17.70% | CE37967 WBGene00000231 locus:atx-  |
| T24B8.1     | 0 | 4 | 0 | 8 | 0      | 31.30% | CE03709 WBGene00004446 locus:rpl-  |
| Y41D4B.5    | 2 | 3 | 2 | 6 | 33.80% | 24.60% | CE21842 WBGene00004497 locus:rps-  |
| Y48G8AL.8a  | 0 | 7 | 0 | 8 | 0      | 25.70% | CE22195 WBGene00004429 locus:rpl-  |
| W07E6.4     | 1 | 5 | 1 | 6 | 2.30%  | 9.50%  | CE17296 WBGene00004188 locus:prp-  |
| F39B2.6     | 2 | 4 | 3 | 4 | 20.50% | 26.50% | CE16012 WBGene00004495 locus:rps-  |
| Y37E3.7     | 0 | 7 | 0 | 7 | 0      | 48.60% | CE26658 WBGene00004409 locus:ria-  |
| H28O16.1c   | 1 | 5 | 1 | 6 | 3.00%  | 12.50% | CE34195 WBGene00010419 status:Co   |
| T22E5.5     | 2 | 5 | 2 | 5 | 6.70%  | 22.70% | CE04994 WBGene00003495 locus:mur   |
| F25H2.11    | 2 | 4 | 2 | 5 | 23.20% | 21.50% | CE09656 WBGene00009122 locus:tct-  |
| Y57A10A.31  | 5 | 2 | 5 | 2 | 6.60%  | 3.60%  | CE22610 WBGene00013270 status:Par  |
| C54C6.2     | 1 | 5 | 1 | 6 | 3.40%  | 13.70% | CE33770 WBGene00000248 locus:ben   |
| F56D2.6a    | 0 | 6 | 0 | 7 | 0      | 10.10% | CE01334 WBGene00018967 status:Co   |
| F56D2.6b    | 0 | 6 | 0 | 7 | 0      | 10.70% | CE32900 WBGene00018967 status:Co   |
| F25B5.4a    | 2 | 1 | 2 | 4 | 2.60%  | 1.10%  | CE01921 WBGene00006727 locus:ubq   |
| T08A11.2    | 3 | 3 | 3 | 3 | 2.60%  | 3.30%  | CE03641 WBGene00011605 status:Par  |
| C06A8.3     | 0 | 6 | 0 | 6 | 0      | 45.00% | CE02454 WBGene00015514 17k antig   |
| F43E2.8     | 3 | 3 | 3 | 3 | 4.00%  | 5.00%  | CE07244 WBGene00002008 locus:hsp   |
| C45B2.5     | 2 | 3 | 2 | 4 | 8.80%  | 12.90% | CE27854 WBGene00001602 locus:glu-  |
| F20H11.3    | 0 | 5 | 0 | 6 | 0      | 16.40% | CE09512 WBGene00003162 locus:mdf   |
| Y113G7B.18  | 1 | 4 | 1 | 5 | 1.60%  | 10.00% | CE40428 WBGene00007017 locus:mdt   |
| D1007.12    | 1 | 4 | 1 | 5 | 5.00%  | 18.20% | CE09047 WBGene00004436 locus:rpl-  |
| C47B2.3     | 0 | 5 | 0 | 6 | 0      | 15.40% | CE17563 WBGene00006529 locus:tba-  |
| K04G2.1     | 0 | 4 | 0 | 6 | 0      | 19.20% | CE16227 WBGene00010560 locus:iftb- |
| F25H2.5     | 0 | 5 | 0 | 6 | 0      | 47.10% | CE09650 WBGene00009119 nucleosid   |
| C44B7.10    | 1 | 3 | 1 | 5 | 3.20%  | 10.80% | CE32326 WBGene00016630 status:Co   |
| T01E8.5     | 1 | 4 | 1 | 5 | 1.00%  | 5.00%  | CE18165 WBGene00011333 status:Par  |
| Y105E8B.1f  | 2 | 4 | 2 | 4 | 23.80% | 26.50% | CE36224 WBGene00002978 locus:lev-  |
| F17C11.9a   | 0 | 4 | 0 | 6 | 0      | 15.30% | CE05656 WBGene00008920 elongator   |
| C53D5.6     | 1 | 5 | 1 | 5 | 1.60%  | 7.10%  | CE26971 WBGene00002077 locus:imb   |
| F36F2.3a    | 0 | 6 | 0 | 6 | 0      | 8.20%  | CE34550 WBGene00009477 locus>tag-  |
| C46A5.9     | 0 | 6 | 0 | 6 | 0      | 10.50% | CE26914 WBGene00001827 locus:hcf-  |
| Y55F3AR.3   | 1 | 4 | 1 | 5 | 2.40%  | 9.00%  | CE35110 WBGene00021934 status:Par  |
| F07D10.1    | 1 | 5 | 1 | 5 | 4.10%  | 16.80% | CE07033 WBGene00004423 locus:rpl-  |
| T22F3.4     | 1 | 5 | 1 | 5 | 4.10%  | 16.80% | CE13968 WBGene00004422 locus:rpl-  |
| C27H6.2     | 1 | 4 | 1 | 5 | 5.00%  | 14.20% | CE08426 WBGene00007784 locus:ruvt  |
| F39B2.10    | 2 | 4 | 2 | 4 | 8.70%  | 18.70% | CE16015 WBGene00001030 locus:djn-  |
| ZK546.13    | 1 | 4 | 1 | 4 | 5.10%  | 20.40% | CE34460 WBGene00007012 locus:mdt   |
| C07A12.4b   | 0 | 5 | 0 | 5 | 0      | 13.30% | CE31878 WBGene00003963 locus:pd-   |
| C07A12.4a   | 0 | 5 | 0 | 5 | 0      | 11.80% | CE03972 WBGene00003963 locus:pd-   |
| F25B5.4c    | 2 | 1 | 2 | 3 | 4.10%  | 1.70%  | CE31915 WBGene00006727 locus:ubq   |
| C07A9.2     | 1 | 3 | 1 | 4 | 5.40%  | 24.50% | CE00499 WBGene00007400 G10 prote   |
| K02B2.1     | 1 | 4 | 1 | 4 | 3.70%  | 15.50% | CE30082 WBGene00019295 6-phosph    |
| D1007.6     | 0 | 4 | 0 | 5 | 0      | 32.90% | CE09041 WBGene00004479 locus:rps-  |
| Y77E11A.13b | 0 | 4 | 0 | 5 | 0      | 28.00% | CE25615 WBGene00003806 locus:npp   |
| C09H10.2    | 0 | 4 | 0 | 5 | 0      | 22.90% | CE02131 WBGene00004454 locus:rpl-  |
| F36A2.6     | 1 | 4 | 1 | 4 | 7.90%  | 16.60% | CE09945 WBGene00004484 locus:rps-  |
| T21B10.7    | 0 | 5 | 0 | 5 | 0      | 13.80% | CE16437 WBGene00011889 t-complex   |
| C01B10.11   | 0 | 4 | 0 | 5 | 0      | 20.40% | CE38583 WBGene00044294 status:Par  |

|             |   |   |   |   |        |        |                                    |
|-------------|---|---|---|---|--------|--------|------------------------------------|
| T08B2.10    | 1 | 2 | 2 | 3 | 12.30% | 22.30% | CE26948 WBGene00004486 locus:rps-  |
| C47B2.2b    | 1 | 2 | 2 | 3 | 6.90%  | 12.10% | CE23599 WBGene00008131 status:Co   |
| C47B2.2a    | 1 | 2 | 2 | 3 | 5.20%  | 9.10%  | CE17562 WBGene00008131 status:Par  |
| ZK1010.1    | 2 | 1 | 2 | 3 | 17.20% | 7.00%  | CE15495 WBGene00006728 locus:ubg   |
| F27D9.5     | 0 | 5 | 0 | 5 | 0      | 10.10% | CE04451 WBGene00017864 locus:pcc   |
| Y38H6C.1    | 0 | 3 | 0 | 5 | 0      | 54.40% | CE19095 WBGene00012615 status:Co   |
| F58E10.3a   | 1 | 3 | 2 | 3 | 2.10%  | 8.60%  | CE18785 WBGene00010260 ATP-depe    |
| B0272.1     | 1 | 4 | 1 | 4 | 2.70%  | 10.40% | CE00850 WBGene00006538 locus:tbb-  |
| Y39A3CL.7b  | 1 | 4 | 1 | 4 | 2.50%  | 12.90% | CE37426 WBGene00021443 status:Par  |
| F40E10.6    | 1 | 3 | 1 | 4 | 8.30%  | 11.10% | CE31508 WBGene00009574 status:Co   |
| Y105E8A.8   | 1 | 4 | 1 | 4 | 3.30%  | 14.90% | CE29846 WBGene00013669 status:Par  |
| F17C11.9b   | 0 | 3 | 0 | 5 | 0      | 13.90% | CE32385 WBGene00008920 status:Co   |
| W03F9.10    | 0 | 3 | 0 | 5 | 0      | 8.80%  | CE14540 WBGene00021004 status:Co   |
| C49F5.1     | 0 | 3 | 0 | 5 | 0      | 12.20% | CE08852 WBGene00008205 locus:sarr  |
| Y45F10D.12  | 0 | 5 | 0 | 5 | 0      | 28.70% | CE16650 WBGene00004430 locus:rpl-  |
| Y22F5A.4    | 1 | 3 | 1 | 4 | 2.30%  | 12.40% | CE16605 WBGene00003090 locus:lys-  |
| F49H12.5    | 2 | 2 | 2 | 3 | 10.10% | 13.20% | CE20835 WBGene00018656 status:Co   |
| F09F7.2a    | 0 | 5 | 0 | 5 | 0      | 50.30% | CE01236 WBGene00003371 locus:mlic  |
| C48E7.3     | 2 | 2 | 2 | 3 | 9.70%  | 9.70%  | CE29953 WBGene00003059 locus:lpd-  |
| C26F1.4     | 1 | 4 | 1 | 4 | 8.50%  | 9.20%  | CE06878 WBGene00004499 locus:rps-  |
| Y105E8A.16  | 1 | 3 | 2 | 3 | 11.10% | 31.60% | CE29835 WBGene00004489 locus:rps-  |
| H06O01.1    | 0 | 4 | 0 | 5 | 0      | 11.90% | CE11570 WBGene00003964 locus:pdil- |
| F26E4.8     | 0 | 4 | 0 | 5 | 0      | 12.20% | CE09692 WBGene00006528 locus:tba-  |
| Y48G8AL.8b  | 0 | 4 | 0 | 5 | 0      | 16.40% | CE30023 WBGene00004429 locus:rpl-  |
| F35H10.11   | 0 | 2 | 0 | 4 | 0      | 19.70% | CE07075 WBGene00001903 locus:his-  |
| K06C4.4     | 0 | 2 | 0 | 4 | 0      | 19.50% | CE10538 WBGene00001894 locus:his-  |
| C07A12.4c   | 0 | 4 | 0 | 4 | 0      | 12.10% | CE40737 WBGene00003963 locus:pdil- |
| T23C6.1     | 1 | 2 | 1 | 3 | 2.50%  | 3.80%  | CE07526 WBGene00007011 locus:mdt   |
| Y92C3B.2d   | 1 | 3 | 1 | 3 | 4.50%  | 11.00% | CE30403 WBGene00006697 locus:uaf-  |
| Y92C3B.2a   | 1 | 3 | 1 | 3 | 4.20%  | 10.50% | CE27339 WBGene00006697 locus:uaf-  |
| Y92C3B.2c   | 1 | 3 | 1 | 3 | 4.40%  | 11.00% | CE29149 WBGene00006697 locus:uaf-  |
| F17E9.9     | 0 | 2 | 0 | 4 | 0      | 19.70% | CE07075 WBGene00001908 locus:his-  |
| H02I12.6    | 0 | 2 | 0 | 4 | 0      | 19.50% | CE05165 WBGene00001940 locus:his-  |
| T10C6.11    | 0 | 2 | 0 | 4 | 0      | 17.00% | CE16386 WBGene00001878 locus:his-  |
| ZK131.9     | 0 | 2 | 0 | 4 | 0      | 19.70% | CE07075 WBGene00001889 locus:his-  |
| ZK131.5     | 0 | 2 | 0 | 4 | 0      | 19.70% | CE07075 WBGene00001885 locus:his-  |
| ZK669.4     | 0 | 4 | 0 | 4 | 0      | 12.50% | CE01115 WBGene00014054 lipoamide   |
| F58G11.5    | 1 | 3 | 1 | 3 | 2.80%  | 6.80%  | CE28038 WBGene00006442 locus>tag-  |
| Y75B12B.2   | 0 | 3 | 0 | 4 | 0      | 28.10% | CE20371 WBGene00000883 locus:cyn-  |
| C08B11.5    | 1 | 2 | 1 | 3 | 3.60%  | 8.00%  | CE36374 WBGene00004723 locus:sap   |
| F37A4.2     | 0 | 3 | 0 | 4 | 0      | 15.30% | CE00710 WBGene00018132 status:Co   |
| B0035.8     | 0 | 2 | 0 | 4 | 0      | 19.50% | CE05165 WBGene00001922 locus:his-  |
| T26A5.9     | 0 | 2 | 0 | 4 | 0      | 38.20% | CE00788 WBGene00001005 locus:dic-  |
| ZK795.3     | 1 | 2 | 1 | 3 | 4.80%  | 10.60% | CE18464 WBGene00014083 status:Co   |
| T12A2.7     | 2 | 2 | 2 | 2 | 11.80% | 11.30% | CE30396 WBGene00020441 status:Co   |
| F52B11.1b   | 1 | 2 | 1 | 3 | 3.30%  | 8.20%  | CE33792 WBGene00009924 status:Co   |
| F52B11.1a   | 1 | 2 | 1 | 3 | 2.60%  | 6.30%  | CE33791 WBGene00009924 status:Co   |
| F45F2.12    | 0 | 2 | 0 | 4 | 0      | 19.50% | CE10538 WBGene00001882 locus:his-  |
| Y37E3.8a    | 1 | 3 | 1 | 3 | 10.30% | 17.20% | CE26774 WBGene00021350 status:Co   |
| T10C6.5     | 1 | 2 | 2 | 2 | 4.30%  | 7.80%  | CE16380 WBGene00011687 status:Co   |
| F54E12.4    | 0 | 2 | 0 | 4 | 0      | 19.50% | CE05165 WBGene00001932 locus:his-  |
| R151.3      | 1 | 2 | 1 | 3 | 3.20%  | 12.90% | CE00744 WBGene00004417 locus:rpl-f |
| F23B12.7    | 0 | 3 | 0 | 4 | 0      | 3.90%  | CE09599 WBGene00009084 CCAAT bi    |
| T21B10.5    | 2 | 2 | 2 | 2 | 9.20%  | 9.20%  | CE23994 WBGene00011887 locus:set-  |
| F57B9.6a    | 0 | 3 | 0 | 4 | 0      | 10.00% | CE01341 WBGene00002083 locus:inf-1 |
| R06A4.9     | 2 | 1 | 2 | 2 | 3.10%  | 2.30%  | CE21113 WBGene00011051 six WD40    |
| F56E10.4    | 0 | 3 | 0 | 4 | 0      | 31.30% | CE19904 WBGene00004496 locus:rps-  |
| C01F6.6c    | 0 | 4 | 0 | 4 | 0      | 15.60% | CE39888 WBGene00006438 locus>tag-  |
| C01F6.6b    | 0 | 4 | 0 | 4 | 0      | 10.90% | CE30848 WBGene00006438 locus>tag-  |
| C01F6.6a    | 0 | 4 | 0 | 4 | 0      | 14.10% | CE30847 WBGene00006438 locus>tag-  |
| C01F6.6e    | 0 | 4 | 0 | 4 | 0      | 19.90% | CE39890 WBGene00006438 locus>tag-  |
| C01F6.6d    | 0 | 4 | 0 | 4 | 0      | 14.80% | CE39889 WBGene00006438 locus>tag-  |
| C41C4.8     | 0 | 4 | 0 | 4 | 0      | 7.40%  | CE05402 WBGene00008053 locus:cdc   |
| F52D10.3a   | 1 | 3 | 1 | 3 | 0.069  | 0.169  | CE03389 WBGene00001502 locus:fft-2 |
| F52D10.3b   | 1 | 3 | 1 | 3 | 8.60%  | 21.20% | CE36489 WBGene00001502 locus:fft-2 |
| K06C4.12    | 0 | 2 | 0 | 4 | 0      | 19.50% | CE10538 WBGene00001896 locus:his-  |
| F37C12.11   | 2 | 2 | 2 | 2 | 12.50% | 31.80% | CE30779 WBGene00004490 locus:rps-  |
| Y119D3B.15  | 0 | 3 | 0 | 4 | 0      | 53.70% | CE34396 WBGene00022492 status:Co   |
| C16A3.9     | 0 | 4 | 0 | 4 | 0      | 19.20% | CE04009 WBGene00004482 locus:rps-  |
| Y69A2AR.18a | 0 | 4 | 0 | 4 | 0      | 15.40% | CE27514 WBGene00022089 status:Co   |
| ZC434.2     | 0 | 3 | 0 | 4 | 0      | 20.60% | CE06577 WBGene00004476 locus:rps-  |
| E01A2.4     | 1 | 2 | 1 | 3 | 3.20%  | 6.30%  | CE24871 WBGene00017086 status:Co   |
| C17G10.5    | 0 | 3 | 0 | 4 | 0      | 14.30% | CE06846 WBGene00003097 locus:lys-l |
| F07B7.4     | 0 | 2 | 0 | 4 | 0      | 17.00% | CE26800 WBGene00001926 locus:his-  |
| F55G1.3     | 0 | 2 | 0 | 4 | 0      | 19.50% | CE05165 WBGene00001936 locus:his-  |
| T21B10.2a   | 2 | 2 | 2 | 2 | 6.50%  | 6.00%  | CE03684 WBGene00011884 locus:eno1  |
| T21B10.2c   | 2 | 2 | 2 | 2 | 6.00%  | 5.60%  | CE36954 WBGene00011884 locus:eno1  |
| T21B10.2b   | 2 | 2 | 2 | 2 | 8.30%  | 7.70%  | CE32730 WBGene00011884 locus:eno1  |
| Y38A10A.5   | 0 | 3 | 0 | 4 | 0      | 8.90%  | CE21562 WBGene00000802 locus:crt-  |
| Y39A3CL.7a  | 1 | 3 | 1 | 3 | 2.10%  | 7.50%  | CE28979 WBGene00021443 status:Par  |
| T05C3.5     | 1 | 2 | 2 | 2 | 5.00%  | 5.20%  | CE13229 WBGene00001037 locus:dnj-  |

|                   |   |   |   |   |        |        |                                    |
|-------------------|---|---|---|---|--------|--------|------------------------------------|
| F17C11.9c         | 0 | 3 | 0 | 4 | 0      | 11.80% | CE39492 WBGene00008920 status:Co   |
| C50F4.5           | 0 | 2 | 0 | 4 | 0      | 19.50% | CE05470 WBGene00001915 locus:his-  |
| Y57A10A.25        | 0 | 4 | 0 | 4 | 0      | 9.80%  | CE22629 WBGene00013265 status:Par  |
| Y57A10A.27        | 0 | 3 | 0 | 4 | 0      | 11.30% | CE25507 WBGene00013267 status:Par  |
| T03E6.7           | 1 | 1 | 2 | 2 | 6.20%  | 5.60%  | CE16333 WBGene00000776 locus:cpl-  |
| C18A3.3           | 1 | 2 | 2 | 2 | 5.00%  | 8.80%  | CE28890 WBGene00015941 status:Co   |
| F52E4.1b          | 0 | 4 | 0 | 4 | 0      | 13.20% | CE30139 WBGene00018701 locus:pccl  |
| F52E4.1a          | 0 | 4 | 0 | 4 | 0      | 12.90% | CE07269 WBGene00018701 locus:pccl  |
| ZK721.2           | 0 | 4 | 0 | 4 | 0      | 14.00% | CE40008 WBGene00006764 locus:unc   |
| C04F12.4          | 1 | 3 | 1 | 3 | 8.90%  | 17.80% | CE19677 WBGene00004426 locus:rpl-  |
| R13A5.8           | 0 | 4 | 0 | 4 | 0      | 19.60% | CE01380 WBGene00004420 locus:rpl-  |
| C28H8.11a         | 0 | 4 | 0 | 4 | 0      | 8.70%  | CE01822 WBGene00016201 tryptophan  |
| R05D11.8          | 0 | 3 | 0 | 4 | 0      | 8.50%  | CE06243 WBGene00011036 locus:edc   |
| C07H6.8           | 0 | 4 | 0 | 4 | 0      | 10.70% | CE30241 WBGene00000854 locus:cux-  |
| F25G6.2           | 1 | 3 | 1 | 3 | 1.20%  | 4.00%  | CE30764 WBGene00017797 status:Par  |
| F07B7.11          | 0 | 2 | 0 | 4 | 0      | 17.00% | CE26800 WBGene00001928 locus:his-  |
| F44F4.11          | 0 | 3 | 0 | 4 | 0      | 10.30% | CE18680 WBGene00006530 locus:tba-  |
| F08G2.1           | 0 | 2 | 0 | 4 | 0      | 19.70% | CE07075 WBGene00001918 locus:his-  |
| F13H8.2           | 1 | 3 | 1 | 3 | 2.50%  | 6.70%  | CE27127 WBGene00017435 beta trans  |
| F52E1.7a          | 0 | 3 | 0 | 3 | 0      | 15.40% | CE04635 WBGene00002021 locus:hsp   |
| F52E1.7b          | 0 | 3 | 0 | 3 | 0      | 15.50% | CE35323 WBGene00002021 locus:hsp   |
| F35H10.1          | 1 | 2 | 1 | 2 | 7.10%  | 12.60% | CE04501 WBGene00001904 locus:his-  |
| K06C4.2           | 2 | 1 | 2 | 1 | 16.50% | 6.80%  | CE03252 WBGene00001902 locus:his-  |
| K06C4.3           | 1 | 2 | 1 | 2 | 7.10%  | 12.60% | CE04501 WBGene00001895 locus:his-  |
| F59G1.3           | 1 | 1 | 2 | 1 | 1.80%  | 2.40%  | CE39945 WBGene00006933 locus:vpss  |
| F20D1.4           | 1 | 2 | 1 | 2 | 7.30%  | 15.10% | CE09497 WBGene00008976 transcripti |
| Y106G6H.3         | 0 | 3 | 0 | 3 | 0      | 28.30% | CE20413 WBGene00004444 locus:rpl-  |
| K02F2.5           | 0 | 2 | 0 | 3 | 0      | 16.30% | CE31353 WBGene00019324 status:Co   |
| T05C12.10         | 0 | 3 | 0 | 3 | 0      | 3.60%  | CE34989 WBGene00004264 locus:qua   |
| H02I12.7          | 1 | 2 | 1 | 2 | 7.10%  | 12.60% | CE04501 WBGene00001939 locus:his-  |
| K02B2.5           | 1 | 2 | 1 | 2 | 8.50%  | 20.50% | CE04691 WBGene00004494 locus:rps-  |
| T10C6.14          | 2 | 1 | 2 | 1 | 16.50% | 6.80%  | CE03252 WBGene00001875 locus:his-  |
| T10C6.12          | 1 | 2 | 1 | 2 | 7.10%  | 12.60% | CE04501 WBGene00001877 locus:his-  |
| ZK813.1           | 1 | 0 | 3 | 0 | 4.80%  | 0      | CE33752 WBGene00022820 status:Co   |
| ZK813.3           | 2 | 0 | 3 | 0 | 26.10% | 0      | CE41093 WBGene00022822 status:Co   |
| ZK131.8           | 2 | 1 | 2 | 1 | 16.50% | 6.80%  | CE03252 WBGene00001888 locus:his-  |
| ZK131.1           | 2 | 1 | 2 | 1 | 16.50% | 6.80%  | CE03252 WBGene00001900 locus:his-  |
| ZK131.6           | 1 | 2 | 1 | 2 | 7.10%  | 12.60% | CE04501 WBGene00001886 locus:his-  |
| ZK131.4           | 2 | 1 | 2 | 1 | 16.50% | 6.80%  | CE03252 WBGene00001884 locus:his-  |
| K01C8.10          | 1 | 2 | 1 | 2 | 3.50%  | 7.00%  | CE02262 WBGene00000379 locus:cct-  |
| F20B6.2           | 0 | 2 | 0 | 3 | 0      | 4.70%  | CE04424 WBGene00006921 locus:vha   |
| F23H12.5          | 1 | 2 | 1 | 2 | 2.60%  | 5.00%  | CE05708 WBGene00009094 Thrombos    |
| T28D9.2d          | 0 | 2 | 0 | 3 | 0      | 9.10%  | CE36574 WBGene00004702 locus:rsp-  |
| T28D9.2b          | 0 | 2 | 0 | 3 | 0      | 11.40% | CE36573 WBGene00004702 locus:rsp-  |
| T28D9.2a          | 0 | 2 | 0 | 3 | 0      | 9.10%  | CE36572 WBGene00004702 locus:rsp-  |
| ZK154.3           | 1 | 2 | 1 | 2 | 3.40%  | 4.50%  | CE15257 WBGene00003171 locus:mec   |
| F14H8.1           | 0 | 2 | 0 | 3 | 0      | 6.70%  | CE35859 WBGene00008832 locus:obr-  |
| R08D7.5           | 0 | 2 | 0 | 3 | 0      | 24.30% | CE33292 WBGene00011145 caltractin  |
| B0035.7           | 1 | 2 | 1 | 2 | 7.10%  | 12.60% | CE04501 WBGene00001921 locus:his-  |
| B0035.9           | 2 | 1 | 2 | 1 | 16.50% | 6.80%  | CE03252 WBGene00001920 locus:his-  |
| K11H12.2          | 0 | 3 | 0 | 3 | 0      | 17.60% | CE12148 WBGene00004427 locus:rpl-  |
| C50F4.13          | 1 | 2 | 1 | 2 | 7.10%  | 12.60% | CE05477 WBGene00001909 locus:his-  |
| C55A6.9           | 1 | 2 | 1 | 2 | 2.80%  | 8.70%  | CE20614 WBGene00008338 status:Par  |
| C25A1.4           | 2 | 0 | 3 | 0 | 6.60%  | 0      | CE08369 WBGene00007706 RNA bindi   |
| C44E4.5           | 2 | 1 | 2 | 1 | 5.20%  | 3.00%  | CE41306 WBGene00016654 status:Par  |
| T09A5.6           | 0 | 2 | 0 | 3 | 0      | 15.00% | CE01087 WBGene00007014 locus:mdt   |
| T20B3.2           | 0 | 2 | 0 | 3 | 0      | 10.00% | CE20087 WBGene00006585 locus:tni-  |
| Y37E3.8b          | 1 | 2 | 1 | 2 | 17.00% | 17.00% | CE26904 WBGene00021350 status:Co   |
| C06A1.1           | 0 | 3 | 0 | 3 | 0      | 5.20%  | CE02114 WBGene00007352 locus:cdc-  |
| Y113G7B.23        | 1 | 2 | 1 | 2 | 4.10%  | 5.60%  | CE25208 WBGene00004203 locus:psa   |
| F54E12.5          | 1 | 2 | 1 | 2 | 7.10%  | 12.60% | CE04501 WBGene00001931 locus:his-  |
| F54E12.3          | 2 | 1 | 2 | 1 | 16.50% | 6.80%  | CE03252 WBGene00001930 locus:his-  |
| Y56A3A.1a         | 1 | 2 | 1 | 2 | 1.60%  | 4.90%  | CE33892 WBGene00003826 locus:nti-  |
| EEED8.7b          | 3 | 0 | 3 | 0 | 29.40% | 0      | CE27910 WBGene00004701 locus:rsp-  |
| EEED8.7a          | 3 | 0 | 3 | 0 | 18.90% | 0      | CE01891 WBGene00004701 locus:rsp-  |
| T21B10.3          | 2 | 0 | 3 | 0 | 2.20%  | 0      | CE23993 WBGene00011885 status:Par  |
| F55G1.11          | 2 | 1 | 2 | 1 | 16.50% | 6.80%  | CE03252 WBGene00001934 locus:his-  |
| F55G1.10          | 1 | 2 | 1 | 2 | 7.10%  | 12.60% | CE04501 WBGene00001935 locus:his-  |
| Y54G2A.12         | 1 | 2 | 1 | 2 | 4.00%  | 10.60% | CE41063 WBGene00021877 status:Par  |
| C02A12.4          | 1 | 1 | 2 | 1 | 5.30%  | 5.30%  | CE07828 WBGene00003096 locus:lys-  |
| F45E1.7b          | 0 | 3 | 0 | 3 | 0      | 9.30%  | CE37111 WBGene00018467 locus:sdpr  |
| F45E1.7a          | 0 | 3 | 0 | 3 | 0      | 9.40%  | CE29323 WBGene00018467 locus:sdpr  |
| R08C7.3           | 2 | 1 | 2 | 1 | 17.90% | 6.40%  | CE07426 WBGene00019947 locus:htz-  |
| C42C1.14          | 0 | 3 | 0 | 3 | 0      | 30.90% | CE26911 WBGene00004448 locus:rpl-  |
| K06C4.10          | 2 | 1 | 2 | 1 | 16.50% | 6.80%  | CE03252 WBGene00001892 locus:his-  |
| K06C4.11          | 1 | 2 | 1 | 2 | 7.10%  | 12.60% | CE04501 WBGene00001893 locus:his-  |
| T22D1.10          | 0 | 3 | 0 | 3 | 0      | 9.80%  | CE17254 WBGene00020687 locus:ruvt  |
| Reverse_C07A12.1b | 1 | 1 | 1 | 2 | 1.50%  | 1.50%  | CE07992 WBGene00001821 locus:harr  |
| Reverse_C07A12.1a | 1 | 1 | 1 | 2 | 1.50%  | 1.50%  | CE39669 WBGene00001821 locus:harr  |
| F27D4.1           | 0 | 2 | 0 | 3 | 0      | 9.00%  | CE24926 WBGene00009187 electron tr |
| C52E4.4           | 0 | 2 | 0 | 3 | 0      | 11.30% | CE08946 WBGene00004501 locus:rpt-  |

|                 |   |   |   |   |        |        |                                    |
|-----------------|---|---|---|---|--------|--------|------------------------------------|
| K03A1.6         | 2 | 1 | 2 | 1 | 16.50% | 6.80%  | CE03252 WBGene00001912 locus:his-  |
| F31E3.1         | 0 | 3 | 0 | 3 | 0      | 12.70% | CE01241 WBGene00000443 locus:ceh-  |
| F54C9.1         | 1 | 2 | 1 | 2 | 5.00%  | 5.00%  | CE02249 WBGene00002065 locus:iff-2 |
| Y69A2AR.18b     | 0 | 3 | 0 | 3 | 0      | 10.90% | CE29133 WBGene00022089 status:Co   |
| Y69A2AR.18c     | 0 | 3 | 0 | 3 | 0      | 17.00% | CE33241 WBGene00022089 status:Co   |
| H32C10.2        | 1 | 2 | 1 | 2 | 5.80%  | 8.60%  | CE21004 WBGene00003019 locus:lin-3 |
| JC8.3a          | 0 | 3 | 0 | 3 | 0      | 20.60% | CE17986 WBGene00004424 locus:rpl-  |
| H28O16.1b       | 1 | 1 | 1 | 2 | 10.30% | 10.30% | CE34194 WBGene00010419 status:Co   |
| T28D6.2         | 0 | 2 | 0 | 3 | 0      | 6.30%  | CE16521 WBGene00006533 locus:tba-  |
| Y48B6A.2        | 1 | 2 | 1 | 2 | 9.90%  | 18.70% | CE22117 WBGene00004456 locus:rpl-4 |
| F07B7.9         | 2 | 1 | 2 | 1 | 16.50% | 6.80%  | CE03252 WBGene00001924 locus:his-  |
| F07B7.3         | 1 | 2 | 1 | 2 | 7.10%  | 12.60% | CE04501 WBGene00001927 locus:his-  |
| F45F2.3         | 2 | 1 | 2 | 1 | 16.50% | 6.80%  | CE03252 WBGene00001879 locus:his-  |
| F45F2.4         | 1 | 2 | 1 | 2 | 7.10%  | 12.60% | CE04501 WBGene00001881 locus:his-  |
| Reverse_C06E1.8 | 1 | 1 | 1 | 2 | 1.50%  | 1.50%  | CE00063 WBGene00015523 status:Pre  |
| Y18D10A.17      | 2 | 1 | 2 | 1 | 6.20%  | 4.10%  | CE21413 WBGene00012484 locus:car-  |
| K10D2.1b        | 0 | 2 | 0 | 3 | 0      | 4.80%  | CE39597 WBGene00019627 status:Par  |
| K10D2.1a        | 0 | 2 | 0 | 3 | 0      | 2.60%  | CE02013 WBGene00019627 status:Par  |
| F13E6.1         | 0 | 3 | 0 | 3 | 0      | 22.60% | CE31474 WBGene00008745 D52 prote   |
| M142.5          | 1 | 2 | 1 | 2 | 5.70%  | 14.40% | CE37539 WBGene00010922 status:Co   |
| F59B8.2         | 0 | 3 | 0 | 3 | 0      | 10.70% | CE03436 WBGene00010317 isocitrate  |
| Y105E8B.1e      | 0 | 3 | 0 | 3 | 0      | 15.60% | CE31733 WBGene00002978 locus:lev-  |
| Y105E8B.1c      | 0 | 3 | 0 | 3 | 0      | 15.60% | CE29059 WBGene00002978 locus:lev-  |
| R07E5.1         | 1 | 2 | 1 | 2 | 1.80%  | 3.60%  | CE00658 WBGene00011109 status:Par  |
| F53B7.3         | 0 | 2 | 0 | 3 | 0      | 10.90% | CE05922 WBGene00009966 status:Co   |
| D1054.10        | 3 | 0 | 3 | 0 | 18.60% | 0      | CE05528 WBGene00008377 status:Co   |
| C50F4.7         | 2 | 1 | 2 | 1 | 16.50% | 6.80%  | CE03252 WBGene00001911 locus:his-  |
| ZK512.5         | 0 | 2 | 0 | 3 | 0      | 2.80%  | CE00411 WBGene00013985 status:Par  |
| E04A4.7         | 0 | 3 | 0 | 3 | 0      | 23.40% | CE16968 WBGene00017121 locus:cyc-  |
| C05E4.9b        | 0 | 3 | 0 | 3 | 0      | 4.90%  | CE32565 WBGene00001564 locus:gei-  |
| C05E4.9a        | 0 | 3 | 0 | 3 | 0      | 4.30%  | CE23521 WBGene00001564 locus:gei-  |
| C16C10.6        | 1 | 2 | 1 | 2 | 4.30%  | 10.20% | CE01497 WBGene00007627 locus:ccd   |
| F09E10.8a       | 0 | 3 | 0 | 3 | 0      | 9.50%  | CE27939 WBGene00017298 locus:toca  |
| K12H4.7b        | 0 | 2 | 0 | 3 | 0      | 6.10%  | CE32697 WBGene00019682 status:Co   |
| K12H4.7a        | 0 | 2 | 0 | 3 | 0      | 5.70%  | CE32696 WBGene00019682 status:Co   |
| T04A8.6         | 0 | 3 | 0 | 3 | 0      | 13.40% | CE01075 WBGene00011408 ribonucleo  |
| Y73E7A.2        | 0 | 3 | 0 | 3 | 0      | 11.90% | CE32277 WBGene00022269 status:Par  |
| Y53C12B.1       | 1 | 2 | 1 | 2 | 1.80%  | 3.90%  | CE14894 WBGene00013143 WD doma     |
| C53A5.3         | 0 | 3 | 0 | 3 | 0      | 8.00%  | CE08952 WBGene00001834 locus:hda   |
| F01F1.12a       | 0 | 3 | 0 | 3 | 0      | 11.50% | CE01225 WBGene00017166 Fructose-l  |
| F01F1.12b       | 0 | 3 | 0 | 3 | 0      | 16.20% | CE30646 WBGene00017166 status:Co   |
| C55B7.4a        | 0 | 3 | 0 | 3 | 0      | 10.80% | CE09015 WBGene00016943 locus:acd   |
| F39H2.2b        | 0 | 3 | 0 | 3 | 0      | 16.80% | CE32411 WBGene00000890 locus:sig-  |
| F39H2.2a        | 0 | 3 | 0 | 3 | 0      | 14.10% | CE32410 WBGene00000890 locus:sig-  |
| T22D1.9         | 1 | 2 | 1 | 2 | 1.20%  | 3.00%  | CE17253 WBGene00004458 locus:rpn-  |
| Y73B3A.18b      | 1 | 2 | 1 | 2 | 5.50%  | 9.00%  | CE31261 WBGene00022219 status:Par  |
| Y73B3A.18a      | 1 | 2 | 1 | 2 | 4.70%  | 7.70%  | CE27328 WBGene00022219 status:Par  |
| D1037.3         | 0 | 2 | 0 | 3 | 0      | 17.10% | CE20622 WBGene00001501 locus:ftn-2 |
| C41G7.1b        | 0 | 2 | 0 | 3 | 0      | 15.00% | CE27843 WBGene00004887 locus:smr   |
| F07B7.10        | 1 | 2 | 1 | 2 | 7.10%  | 12.60% | CE04501 WBGene00001925 locus:his-  |
| Reverse_F15D4.7 | 1 | 0 | 3 | 0 | 0.30%  | 0      | CE23659 WBGene00008864 status:Pre  |
| F22B3.1         | 2 | 1 | 2 | 1 | 16.50% | 6.80%  | CE03252 WBGene00001938 locus:his-  |
| ZK131.10        | 1 | 2 | 1 | 2 | 7.10%  | 12.60% | CE04501 WBGene00001890 locus:his-  |
| F08G2.2         | 1 | 2 | 1 | 2 | 7.10%  | 12.60% | CE04501 WBGene00001917 locus:his-  |
| F17E9.12        | 2 | 1 | 2 | 1 | 16.50% | 6.80%  | CE03252 WBGene00001905 locus:his-  |
| F17E9.13        | 1 | 2 | 1 | 2 | 7.10%  | 12.60% | CE04501 WBGene00001907 locus:his-  |
| R144.7a         | 0 | 3 | 0 | 3 | 0      | 5.20%  | CE39272 WBGene00020097 locus:larp  |
| R144.7b         | 0 | 3 | 0 | 3 | 0      | 4.20%  | CE31582 WBGene00020097 locus:larp  |
| T23D8.5         | 2 | 1 | 2 | 1 | 16.50% | 6.80%  | CE03252 WBGene00001941 locus:his-  |
| T23D8.6         | 1 | 2 | 1 | 2 | 7.10%  | 12.60% | CE04501 WBGene00001942 locus:his-  |
| F52B10.1        | 2 | 1 | 2 | 1 | 1.70%  | 0.80%  | CE31177 WBGene00003776 locus:nmy   |
| F53A2.7         | 0 | 2 | 0 | 2 | 0      | 11.40% | CE10878 WBGene00009952 Thiolas     |
| Y92C3B.2b       | 0 | 2 | 0 | 2 | 0      | 21.70% | CE25626 WBGene00006697 locus:uaf-  |
| F25H5.3b        | 0 | 2 | 0 | 2 | 0      | 5.80%  | CE15899 WBGene00009126 Pyruvate    |
| F25H5.3a        | 0 | 2 | 0 | 2 | 0      | 6.20%  | CE15898 WBGene00009126 Pyruvate    |
| F25H5.3d        | 0 | 2 | 0 | 2 | 0      | 6.30%  | CE37832 WBGene00009126 Pyruvate    |
| F25H5.3c        | 0 | 2 | 0 | 2 | 0      | 6.60%  | CE36135 WBGene00009126 status:Co   |
| M106.1          | 2 | 0 | 2 | 0 | 2.10%  | 0      | CE18083 WBGene00003367 locus:mix-  |
| T24G10.2        | 0 | 2 | 0 | 2 | 0      | 8.90%  | CE37993 WBGene00020779 status:Par  |
| F32A7.5a        | 0 | 2 | 0 | 2 | 0      | 3.90%  | CE09846 WBGene00009306 claustrin I |
| F32A7.5c        | 0 | 2 | 0 | 2 | 0      | 3.90%  | CE34179 WBGene00009306 status:Par  |
| F32A7.5b        | 0 | 2 | 0 | 2 | 0      | 4.50%  | CE34178 WBGene00009306 status:Par  |
| F53A3.3         | 0 | 2 | 0 | 2 | 0      | 17.70% | CE10884 WBGene00004491 locus:rps-  |
| F57B10.3b       | 0 | 2 | 0 | 2 | 0      | 7.10%  | CE33113 WBGene00019001 status:Co   |
| F57B10.3a       | 0 | 2 | 0 | 2 | 0      | 6.90%  | CE11302 WBGene00019001 phosphog    |
| K01G5.2b        | 0 | 2 | 0 | 2 | 0      | 9.00%  | CE25037 WBGene00001996 locus:hpl-  |
| K01G5.2c        | 0 | 2 | 0 | 2 | 0      | 8.90%  | CE25038 WBGene00001996 locus:hpl-  |
| K01G5.2a        | 0 | 2 | 0 | 2 | 0      | 15.40% | CE16191 WBGene00001996 locus:hpl-  |
| C48B6.6a        | 0 | 2 | 0 | 2 | 0      | 1.00%  | CE30258 WBGene00004879 locus:smc   |
| C26B2.3c        | 0 | 2 | 0 | 2 | 0      | 4.80%  | CE37709 WBGene00003625 locus:nhr-  |
| C26B2.3a        | 0 | 2 | 0 | 2 | 0      | 4.50%  | CE17474 WBGene00003625 locus:nhr-  |

|            |   |   |   |   |        |        |                                    |
|------------|---|---|---|---|--------|--------|------------------------------------|
| C44B12.2   | 0 | 1 | 0 | 2 | 0      | 7.60%  | CE08703 WBGene00003893 locus:ost-  |
| ZC518.3a   | 0 | 2 | 0 | 2 | 0      | 4.80%  | CE31743 WBGene00000376 locus:ccr-  |
| ZC518.3b   | 0 | 2 | 0 | 2 | 0      | 4.70%  | CE31744 WBGene00000376 locus:ccr-  |
| ZC518.3c   | 0 | 2 | 0 | 2 | 0      | 4.90%  | CE31745 WBGene00000376 locus:ccr-  |
| T28D9.10   | 0 | 2 | 0 | 2 | 0      | 24.60% | CE02065 WBGene00004916 locus:snr-  |
| T07A5.6c   | 1 | 1 | 1 | 1 | 12.50% | 12.50% | CE41450 WBGene00044098 status:Co   |
| T07A5.6b   | 1 | 1 | 1 | 1 | 18.00% | 18.00% | CE38102 WBGene00044098 status:Co   |
| T07A5.6a   | 1 | 1 | 1 | 1 | 20.40% | 20.40% | CE23955 WBGene00044098 status:Co   |
| Y75B12B.5  | 0 | 2 | 0 | 2 | 0      | 19.70% | CE20374 WBGene00000879 locus:cyn-  |
| C32E8.2b   | 0 | 2 | 0 | 2 | 0      | 25.00% | CE33562 WBGene00004425 locus:rpl-  |
| Y62H9A.4   | 2 | 0 | 2 | 0 | 9.00%  | 0      | CE19240 WBGene00013392 status:Co   |
| M01B12.5a  | 0 | 2 | 0 | 2 | 0      | 5.50%  | CE30555 WBGene00019698 status:Co   |
| K12G11.3   | 0 | 2 | 0 | 2 | 0      | 7.40%  | CE12212 WBGene00010790 locus:sod   |
| K10B3.10   | 1 | 1 | 1 | 1 | 0.80%  | 0.40%  | CE07373 WBGene00004951 locus:spc-  |
| Y24D9A.1b  | 2 | 0 | 2 | 0 | 5.50%  | 0      | CE29994 WBGene00021281 status:Co   |
| Y24D9A.1a  | 2 | 0 | 2 | 0 | 4.00%  | 0      | CE21464 WBGene00021281 status:Co   |
| W02F12.5   | 1 | 1 | 1 | 1 | 4.10%  | 4.50%  | CE31083 WBGene00020950 dihydrolip  |
| C33H5.6    | 1 | 1 | 1 | 1 | 6.50%  | 5.20%  | CE04149 WBGene00016373 status:Pa   |
| W01D2.1    | 0 | 2 | 0 | 2 | 0      | 20.70% | CE18312 WBGene00012179 ribosomal   |
| T23B5.1a   | 0 | 2 | 0 | 2 | 0      | 4.00%  | CE18281 WBGene00011939 status:Co   |
| T23B5.1b   | 0 | 2 | 0 | 2 | 0      | 7.80%  | CE39779 WBGene00011939 status:Co   |
| F52B5.6    | 1 | 1 | 1 | 1 | 7.50%  | 8.90%  | CE05721 WBGene00004439 locus:rpl-  |
| R03G5.1b   | 1 | 1 | 1 | 1 | 13.00% | 18.20% | CE33153 WBGene00001169 locus:eff-4 |
| F59A2.5    | 0 | 1 | 0 | 2 | 0      | 11.40% | CE01023 WBGene00010305 status:Pa   |
| K05C4.5    | 1 | 1 | 1 | 1 | 2.00%  | 2.00%  | CE19973 WBGene00010582 status:Co   |
| ZK1127.9c  | 0 | 2 | 0 | 2 | 0      | 4.50%  | CE29626 WBGene00022855 status:Pa   |
| ZK1127.9a  | 0 | 2 | 0 | 2 | 0      | 3.40%  | CE28172 WBGene00022855 status:Pa   |
| ZK1127.9b  | 0 | 2 | 0 | 2 | 0      | 3.40%  | CE28173 WBGene00022855 status:Pa   |
| ZK1127.9e  | 0 | 2 | 0 | 2 | 0      | 5.10%  | CE33493 WBGene00022855 status:Pa   |
| Y55B1AR.1  | 1 | 1 | 1 | 1 | 14.40% | 6.20%  | CE22493 WBGene00002269 locus:lec-  |
| Y56A3A.1b  | 1 | 1 | 1 | 1 | 5.60%  | 10.10% | CE18516 WBGene00003826 locus:ntl-3 |
| T19A6.2b   | 0 | 2 | 0 | 2 | 0      | 5.10%  | CE32494 WBGene00003596 locus:ngp   |
| T19A6.2a   | 0 | 2 | 0 | 2 | 0      | 4.60%  | CE32493 WBGene00003596 locus:ngp   |
| T19A6.2c   | 0 | 2 | 0 | 2 | 0      | 4.90%  | CE38417 WBGene00003596 locus:ngp   |
| F54C4.2    | 1 | 1 | 1 | 1 | 5.80%  | 15.00% | CE19891 WBGene00005014 locus:spt-  |
| F32E10.4   | 0 | 2 | 0 | 2 | 0      | 4.50%  | CE20745 WBGene00002074 locus:ima   |
| F47B10.1   | 0 | 2 | 0 | 2 | 0      | 6.20%  | CE03351 WBGene00009812 succinate   |
| F53H1.1    | 0 | 2 | 0 | 2 | 0      | 2.60%  | CE27427 WBGene00018776 helicase s  |
| T05G5.6    | 1 | 1 | 1 | 1 | 4.50%  | 4.50%  | CE00318 WBGene00001155 locus:ech-  |
| ZK1098.1   | 1 | 1 | 1 | 1 | 1.50%  | 1.50%  | CE03847 WBGene00014218 WWVrsp5     |
| ZK973.6    | 0 | 2 | 0 | 2 | 0      | 0.40%  | CE33588 WBGene00000140 locus:anc   |
| C47E12.4d  | 0 | 1 | 0 | 2 | 0      | 5.50%  | CE05448 WBGene00008149 locus:pyp   |
| C47E12.4b  | 0 | 1 | 0 | 2 | 0      | 3.90%  | CE33768 WBGene00008149 locus:pyp   |
| C47E12.4c  | 0 | 1 | 0 | 2 | 0      | 3.90%  | CE33769 WBGene00008149 locus:pyp   |
| C47E12.4a  | 0 | 1 | 0 | 2 | 0      | 4.70%  | CE33767 WBGene00008149 locus:pyp   |
| C56G7.1    | 1 | 0 | 2 | 0 | 6.40%  | 0      | CE01531 WBGene00003372 locus:mic-  |
| R06C7.10   | 0 | 1 | 0 | 2 | 0      | 0.70%  | CE06253 WBGene00002348 locus:let-7 |
| F39H12.3   | 1 | 1 | 1 | 1 | 8.10%  | 6.20%  | CE40651 WBGene00018214 status:Pre  |
| C05D11.11a | 0 | 2 | 0 | 2 | 0      | 6.60%  | CE01130 WBGene00003214 locus:mel-  |
| C05D11.11b | 0 | 2 | 0 | 2 | 0      | 6.30%  | CE29661 WBGene00003214 locus:mel-  |
| T27C4.4d   | 1 | 1 | 1 | 1 | 3.40%  | 1.70%  | CE33331 WBGene00003025 locus:lin-4 |
| T27C4.4a   | 1 | 1 | 1 | 1 | 2.90%  | 1.50%  | CE21211 WBGene00003025 locus:lin-4 |
| T27C4.4b   | 1 | 1 | 1 | 1 | 3.40%  | 1.70%  | CE21212 WBGene00003025 locus:lin-4 |
| T27C4.4c   | 1 | 1 | 1 | 1 | 4.00%  | 2.00%  | CE33330 WBGene00003025 locus:lin-4 |
| F54A3.3    | 0 | 2 | 0 | 2 | 0      | 5.70%  | CE31540 WBGene00018782 status:Pa   |
| F01G4.1    | 1 | 1 | 1 | 1 | 1.10%  | 1.00%  | CE05553 WBGene00004204 locus:psa   |
| F46E10.10a | 0 | 2 | 0 | 2 | 0      | 8.60%  | CE20820 WBGene00018491 lactate de  |
| F09E5.1    | 1 | 1 | 1 | 1 | 2.70%  | 2.70%  | CE02604 WBGene00004034 locus:pkc-  |
| Y49E10.15  | 0 | 2 | 0 | 2 | 0      | 32.20% | CE22230 WBGene00004919 locus:snr-  |
| C48B6.2    | 0 | 2 | 0 | 2 | 0      | 12.60% | CE08804 WBGene00016740 ribosomal   |
| Y39B6A.14  | 0 | 2 | 0 | 2 | 0      | 3.20%  | CE40630 WBGene00012676 locus:pro-  |
| F31E3.3    | 0 | 2 | 0 | 2 | 0      | 8.40%  | CE01268 WBGene00004340 locus:rfc-  |
| F01F1.8a   | 0 | 2 | 0 | 2 | 0      | 5.80%  | CE01234 WBGene00000381 locus:ccl-  |
| B0464.2    | 1 | 1 | 1 | 1 | 1.40%  | 1.50%  | CE20456 WBGene00007184 TPR Dom     |
| F20G4.3    | 2 | 0 | 2 | 0 | 1.90%  | 0      | CE27133 WBGene00003777 locus:nmy   |
| F23C8.5    | 0 | 2 | 0 | 2 | 0      | 11.40% | CE29774 WBGene00017734 electron tr |
| F29G9.5    | 0 | 1 | 0 | 2 | 0      | 4.70%  | CE09799 WBGene00004502 locus:rpt-  |
| ZK20.3     | 0 | 1 | 0 | 2 | 0      | 2.20%  | CE06606 WBGene00013924 locus:rad-  |
| C25A11.4e  | 1 | 1 | 1 | 1 | 1.50%  | 1.50%  | CE39677 WBGene00000100 locus:ajm-  |
| C25A11.4d  | 1 | 1 | 1 | 1 | 0.90%  | 0.90%  | CE30874 WBGene00000100 locus:ajm-  |
| C25A11.4c  | 1 | 1 | 1 | 1 | 1.10%  | 1.10%  | CE27085 WBGene00000100 locus:ajm-  |
| C25A11.4b  | 1 | 1 | 1 | 1 | 1.40%  | 1.40%  | CE27084 WBGene00000100 locus:ajm-  |
| C25A11.4a  | 1 | 1 | 1 | 1 | 0.90%  | 0.90%  | CE27083 WBGene00000100 locus:ajm-  |
| ZK863.6    | 1 | 1 | 1 | 1 | 13.00% | 13.00% | CE15445 WBGene00001088 locus:dpy-  |
| Y49A3A.5   | 0 | 1 | 0 | 2 | 0      | 7.30%  | CE22213 WBGene00000877 locus:cyn-  |
| Y49A3A.2   | 0 | 2 | 0 | 2 | 0      | 5.30%  | CE22210 WBGene00013025 locus:vha   |
| C30C11.4   | 0 | 2 | 0 | 2 | 0      | 4.80%  | CE00103 WBGene00016250 Msi3p sta   |
| F38H4.9    | 0 | 1 | 0 | 2 | 0      | 4.70%  | CE10074 WBGene00002363 locus:let-5 |
| Y45F10C.2  | 2 | 0 | 2 | 0 | 24.80% | 0      | CE16636 WBGene00012878 status:Co   |
| Y108F1.5   | 0 | 1 | 0 | 2 | 0      | 3.00%  | CE31829 WBGene00022433 status:Pre  |
| F31F4.15   | 0 | 2 | 0 | 2 | 0      | 2.90%  | CE09835 WBGene00017962 locus:fbx   |

|            |   |   |   |   |        |        |                                    |
|------------|---|---|---|---|--------|--------|------------------------------------|
| D1054.14   | 0 | 1 | 0 | 2 | 0      | 4.10%  | CE05532 WBGene00008380 status:Co   |
| C37C3.6c   | 0 | 2 | 0 | 2 | 0      | 2.40%  | CE30735 WBGene00016498 locus:ppn   |
| C37C3.6a   | 0 | 2 | 0 | 2 | 0      | 2.20%  | CE17535 WBGene00016498 locus:ppn   |
| C37C3.6b   | 0 | 2 | 0 | 2 | 0      | 1.60%  | CE17536 WBGene00016498 locus:ppn   |
| C37C3.2b   | 0 | 2 | 0 | 2 | 0      | 5.70%  | CE29707 WBGene00016496 status:Co   |
| C37C3.2a   | 0 | 2 | 0 | 2 | 0      | 5.30%  | CE27367 WBGene00016496 status:Co   |
| C37C3.2c   | 0 | 2 | 0 | 2 | 0      | 5.60%  | CE32821 WBGene00016496 status:Co   |
| ZK652.1    | 1 | 1 | 1 | 1 | 21.20% | 21.20% | CE00446 WBGene00004918 locus:snr-  |
| T22F3.3b   | 0 | 1 | 0 | 2 | 0      | 1.70%  | CE20769 WBGene00020696 status:Co   |
| T22F3.3a   | 0 | 1 | 0 | 2 | 0      | 1.60%  | CE24003 WBGene00020696 status:Co   |
| Y67H2A.1   | 1 | 1 | 1 | 1 | 2.00%  | 2.00%  | CE32993 WBGene00013460 status:Par  |
| F08C6.4a   | 1 | 0 | 2 | 0 | 4.20%  | 0      | CE27924 WBGene00006063 locus:sto-  |
| F08C6.4b   | 1 | 0 | 2 | 0 | 4.30%  | 0      | CE41113 WBGene00006063 locus:sto-  |
| F36F2.3b   | 0 | 2 | 0 | 2 | 0      | 7.40%  | CE39152 WBGene00009477 locus:tag-  |
| C25B8.3c   | 0 | 2 | 0 | 2 | 0      | 8.90%  | CE41106 WBGene0000786 locus:cpr-   |
| C25B8.3b   | 0 | 2 | 0 | 2 | 0      | 8.70%  | CE30876 WBGene0000786 locus:cpr-   |
| C25B8.3a   | 0 | 2 | 0 | 2 | 0      | 8.70%  | CE04078 WBGene0000786 locus:cpr-   |
| F45D11.16  | 0 | 2 | 0 | 2 | 0      | 5.00%  | CE20794 WBGene00018461 status:Pre  |
| F45D11.15  | 0 | 2 | 0 | 2 | 0      | 5.00%  | CE20794 WBGene00018460 status:Pre  |
| F45D11.14  | 0 | 2 | 0 | 2 | 0      | 4.90%  | CE23736 WBGene00018459 status:Pre  |
| F58A4.9    | 0 | 2 | 0 | 2 | 0      | 21.50% | CE00225 WBGene00010230 RNA Pol I   |
| C24H11.9   | 0 | 2 | 0 | 2 | 0      | 27.70% | CE36687 WBGene00007704 locus:mdt   |
| K12H4.3    | 0 | 1 | 0 | 2 | 0      | 4.80%  | CE00268 WBGene00019678 status:Co   |
| K01C8.9    | 0 | 2 | 0 | 2 | 0      | 5.00%  | CE02270 WBGene00003821 locus:nst-  |
| Y48A6B.13  | 1 | 1 | 1 | 1 | 3.50%  | 7.30%  | CE19195 WBGene00012973 locus:spa   |
| Y53C12B.2  | 0 | 2 | 0 | 2 | 0      | 11.60% | CE14896 WBGene00013144 status:Co   |
| K04F10.7   | 0 | 2 | 0 | 2 | 0      | 11.60% | CE18015 WBGene00019399 status:Co   |
| C28H8.11b  | 0 | 2 | 0 | 2 | 0      | 5.70%  | CE32153 WBGene00016201 status:Par  |
| C07H6.4    | 0 | 1 | 0 | 2 | 0      | 1.40%  | CE00755 WBGene00015581 Probable    |
| C55B7.4b   | 0 | 2 | 0 | 2 | 0      | 11.90% | CE32840 WBGene00016943 locus:acd   |
| C03D6.8    | 0 | 1 | 0 | 2 | 0      | 8.00%  | CE05202 WBGene00004437 locus:rpl-2 |
| F09F7.2b   | 0 | 2 | 0 | 2 | 0      | 41.10% | CE30652 WBGene00003371 locus:mic   |
| C41G7.1a   | 0 | 1 | 0 | 2 | 0      | 7.10%  | CE08665 WBGene00004887 locus:smr   |
| T08G11.1a  | 1 | 0 | 2 | 0 | 0.50%  | 0      | CE13443 WBGene00011629 nucleotide  |
| T08G11.1b  | 1 | 0 | 2 | 0 | 0.50%  | 0      | CE30353 WBGene00011629 nucleotide  |
| C55B7.9    | 0 | 2 | 0 | 2 | 0      | 10.80% | CE09020 WBGene00007018 locus:mdt   |
| F17C11.8   | 0 | 2 | 0 | 2 | 0      | 8.10%  | CE38502 WBGene00008919 locus:tag-  |
| C26D10.2a  | 0 | 2 | 0 | 2 | 0      | 7.10%  | CE03025 WBGene00001840 locus:hel-  |
| F54E2.3b   | 2 | 0 | 2 | 0 | 0.60%  | 0      | CE28729 WBGene00004130 locus:ketr  |
| F54E2.3a   | 2 | 0 | 2 | 0 | 0.50%  | 0      | CE30078 WBGene00004130 locus:ketr  |
| F54E2.3d   | 2 | 0 | 2 | 0 | 0.50%  | 0      | CE30808 WBGene00004130 locus:ketr  |
| F54E2.3c   | 2 | 0 | 2 | 0 | 0.50%  | 0      | CE30807 WBGene00004130 locus:ketr  |
| W03F8.1    | 0 | 2 | 0 | 2 | 0      | 12.40% | CE29829 WBGene00006586 locus:tni-4 |
| K08D10.3   | 0 | 1 | 0 | 2 | 0      | 7.80%  | CE07355 WBGene00004386 locus:rnp-  |
| Y22D7AL.10 | 0 | 2 | 0 | 2 | 0      | 27.80% | CE27242 WBGene00021248 status:Co   |
| T07A9.11   | 0 | 2 | 0 | 2 | 0      | 20.60% | CE40119 WBGene00004493 locus:rps-  |
| C08F11.12  | 2 | 0 | 2 | 0 | 24.80% | 0      | CE17389 WBGene00007459 status:Co   |
| Y75B8A.8   | 0 | 2 | 0 | 2 | 0      | 3.50%  | CE34135 WBGene00013545 status:Par  |
| T14F9.1    | 0 | 1 | 0 | 2 | 0      | 4.00%  | CE07497 WBGene00020507 locus:vha   |
| K06C4.5    | 0 | 1 | 0 | 2 | 0      | 6.60%  | CE03253 WBGene00001891 locus:his-  |
| B0285.1    | 0 | 1 | 0 | 1 | 0      | 1.40%  | CE31401 WBGene00007135 serineVthr  |
| Y18H1A.2   | 0 | 1 | 0 | 1 | 0      | 4.40%  | CE21438 WBGene00021208 status:Co   |
| C36E6.3    | 0 | 1 | 0 | 1 | 0      | 10.00% | CE34269 WBGene00003369 locus:mic   |
| C36E6.5    | 0 | 1 | 0 | 1 | 0      | 10.00% | CE20542 WBGene00003370 locus:mic   |
| T13C2.4    | 0 | 1 | 0 | 1 | 0      | 11.20% | CE39774 WBGene00020480 LDL recep   |
| F35G12.2   | 0 | 1 | 0 | 1 | 0      | 3.00%  | CE31500 WBGene00009440 isocitrate  |
| B0336.3    | 0 | 1 | 0 | 1 | 0      | 2.10%  | CE29542 WBGene00015143 status:Par  |
| K10C3.4    | 1 | 0 | 1 | 0 | 3.00%  | 0      | CE12080 WBGene00010731 status:Par  |
| F35H12.3   | 1 | 0 | 1 | 0 | 2.30%  | 0      | CE24946 WBGene00004769 locus:sel-  |
| F45E1.6    | 0 | 1 | 0 | 1 | 0      | 6.60%  | CE01943 WBGene00001945 locus:his-  |
| H22K11.1   | 0 | 1 | 0 | 1 | 0      | 4.00%  | CE19495 WBGene00000216 locus:asp   |
| Y67D8C.10a | 0 | 1 | 0 | 1 | 0      | 1.60%  | CE28372 WBGene00003153 locus:mca   |
| Y67D8C.10b | 0 | 1 | 0 | 1 | 0      | 1.50%  | CE28373 WBGene00003153 locus:mca   |
| Y67D8C.10c | 0 | 1 | 0 | 1 | 0      | 1.60%  | CE31664 WBGene00003153 locus:mca   |
| C14C11.6   | 1 | 0 | 1 | 0 | 2.10%  | 0      | CE06825 WBGene00003507 locus:mut   |
| W07E6.1    | 1 | 0 | 1 | 0 | 2.10%  | 0      | CE28259 WBGene00021073 nucleolar   |
| F07A5.7    | 0 | 1 | 0 | 1 | 0      | 1.60%  | CE09197 WBGene00006754 locus:unc   |
| R07B1.4    | 0 | 1 | 0 | 1 | 0      | 8.10%  | CE30562 WBGene00001784 locus:gst-  |
| F56D2.1    | 0 | 1 | 0 | 1 | 0      | 2.80%  | CE11226 WBGene00018963 locus:ucr-  |
| Y40B1B.5   | 0 | 1 | 0 | 1 | 0      | 7.50%  | CE20239 WBGene00012738 status:Co   |
| K10G9.3    | 0 | 1 | 0 | 1 | 0      | 3.50%  | CE31715 WBGene00010757 locus:pad   |
| T01G9.2a   | 1 | 0 | 1 | 0 | 3.10%  | 0      | CE27202 WBGene00011344 status:Co   |
| T01G9.2b   | 1 | 0 | 1 | 0 | 3.10%  | 0      | CE23937 WBGene00011344 status:Co   |
| Y47D3B.10  | 0 | 1 | 0 | 1 | 0      | 3.20%  | CE20261 WBGene00001077 locus:dpy   |
| Y55F3AM.12 | 0 | 1 | 0 | 1 | 0      | 4.20%  | CE22543 WBGene00021929 locus:dca   |
| ZK520.5    | 0 | 1 | 0 | 1 | 0      | 7.00%  | CE16730 WBGene00000878 locus:cyn-  |
| H02112.1   | 1 | 0 | 1 | 0 | 1.00%  | 0      | CE37527 WBGene00010351 status:Par  |
| Y41C4A.10  | 0 | 1 | 0 | 1 | 0      | 17.80% | CE20250 WBGene00001235 locus:elb-  |
| F53A9.10b  | 1 | 0 | 1 | 0 | 4.60%  | 0      | CE34878 WBGene00006587 locus:tnf-2 |
| F53A9.10a  | 1 | 0 | 1 | 0 | 3.50%  | 0      | CE34313 WBGene00006587 locus:tnf-2 |
| ZK1320.6   | 0 | 1 | 0 | 1 | 0      | 1.90%  | CE37598 WBGene00000180 locus:arc-  |

|                   |   |   |   |   |        |                                     |                                    |
|-------------------|---|---|---|---|--------|-------------------------------------|------------------------------------|
| T10C6.13          | 0 | 1 | 0 | 1 | 0      | 6.60%                               | CE03253 WBGene00001876 locus:his-  |
| Y37D8A.9b         | 0 | 1 | 0 | 1 | 0      | 4.50%                               | CE41465 WBGene00003406 locus:mrg   |
| Y37D8A.9a         | 0 | 1 | 0 | 1 | 0      | 4.50%                               | CE20213 WBGene00003406 locus:mrg   |
| ZK131.3           | 0 | 1 | 0 | 1 | 0      | 6.60%                               | CE03253 WBGene00001883 locus:his-  |
| ZK131.2           | 0 | 1 | 0 | 1 | 0      | 6.60%                               | CE03253 WBGene00001899 locus:his-  |
| ZK131.7           | 0 | 1 | 0 | 1 | 0      | 6.60%                               | CE03253 WBGene00001887 locus:his-  |
| T03F1.3           | 0 | 1 | 0 | 1 | 0      | 4.10%                               | CE13100 WBGene00020185 locus:pgk   |
| C48B6.6b          | 0 | 1 | 0 | 1 | 0      | 0.60%                               | CE36919 WBGene00004879 locus:smc   |
| R01H10.1          | 1 | 0 | 1 | 0 | 1.90%  | 0 CE28840 WBGene00001002 locus:div- |                                    |
| Y63D3A.5          | 0 | 1 | 0 | 1 | 0      | 2.70%                               | CE20336 WBGene00006565 locus:ftg-  |
| T11G6.1a          | 0 | 1 | 0 | 1 | 0      | 2.90%                               | CE06427 WBGene00002001 locus:hrc-  |
| C13B9.3           | 0 | 1 | 0 | 1 | 0      | 2.30%                               | CE01778 WBGene00015734 status:Co   |
| R05D3.4b          | 0 | 1 | 0 | 1 | 0      | 1.00%                               | CE37396 WBGene00007008 locus:rpf-  |
| R05D3.4a          | 0 | 1 | 0 | 1 | 0      | 1.00%                               | CE00283 WBGene00007008 locus:rpf-  |
| K02F6.3           | 1 | 0 | 1 | 0 | 1.40%  | 0 CE36874 WBGene00019337 status:Par |                                    |
| JC8.2             | 1 | 0 | 1 | 0 | 3.00%  | 0 CE37529 WBGene00010435 status:Par |                                    |
| F29D11.2          | 1 | 0 | 1 | 0 | 1.90%  | 0 CE09790 WBGene00009254 status:Par |                                    |
| C34D4.14          | 0 | 1 | 0 | 1 | 0      | 0.40%                               | CE17508 WBGene00016405 status:Par  |
| K07D4.3           | 1 | 0 | 1 | 0 | 4.20%  | 0 CE19527 WBGene00004467 locus:rpn- |                                    |
| C44B11.3          | 0 | 1 | 0 | 1 | 0      | 4.00%                               | CE24843 WBGene00003175 locus:mec   |
| C02B10.4          | 0 | 1 | 0 | 1 | 0      | 10.00%                              | CE16801 WBGene00015329 status:Co   |
| K11E8.1e          | 1 | 0 | 1 | 0 | 2.40%  | 0 CE28055 WBGene00006779 locus:unc  |                                    |
| K11E8.1f          | 1 | 0 | 1 | 0 | 2.50%  | 0 CE28056 WBGene00006779 locus:unc  |                                    |
| K11E8.1g          | 1 | 0 | 1 | 0 | 2.50%  | 0 CE28057 WBGene00006779 locus:unc  |                                    |
| K11E8.1h          | 1 | 0 | 1 | 0 | 2.30%  | 0 CE28058 WBGene00006779 locus:unc  |                                    |
| K11E8.1a          | 1 | 0 | 1 | 0 | 2.30%  | 0 CE28051 WBGene00006779 locus:unc  |                                    |
| K11E8.1b          | 1 | 0 | 1 | 0 | 9.50%  | 0 CE28052 WBGene00006779 locus:unc  |                                    |
| K11E8.1c          | 1 | 0 | 1 | 0 | 1.80%  | 0 CE28053 WBGene00006779 locus:unc  |                                    |
| K11E8.1d          | 1 | 0 | 1 | 0 | 2.70%  | 0 CE28054 WBGene00006779 locus:unc  |                                    |
| K11E8.1i          | 1 | 0 | 1 | 0 | 3.70%  | 0 CE28059 WBGene00006779 locus:unc  |                                    |
| K11E8.1k          | 1 | 0 | 1 | 0 | 4.30%  | 0 CE28060 WBGene00006779 locus:unc  |                                    |
| K11E8.1l          | 1 | 0 | 1 | 0 | 4.30%  | 0 CE28061 WBGene00006779 locus:unc  |                                    |
| C47D12.2          | 0 | 1 | 0 | 1 | 0      | 2.30%                               | CE20567 WBGene00008136 status:Co   |
| F41E7.5           | 0 | 1 | 0 | 1 | 0      | 13.40%                              | CE03305 WBGene00009621 locus:flpr- |
| F43E2.5           | 0 | 1 | 0 | 1 | 0      | 7.70%                               | CE07241 WBGene00018393 status:Co   |
| F37A4.5           | 1 | 0 | 1 | 0 | 4.10%  | 0 CE00707 WBGene00018135 status:Par |                                    |
| B0035.4           | 0 | 1 | 0 | 1 | 0      | 12.70%                              | CE05162 WBGene00007107 locus:pfd-  |
| ZK686.4           | 1 | 0 | 1 | 0 | 7.80%  | 0 CE40676 WBGene00022794 status:Par |                                    |
| C36B1.8a          | 1 | 0 | 1 | 0 | 1.60%  | 0 CE34472 WBGene00007975 status:Par |                                    |
| C36B1.8b          | 1 | 0 | 1 | 0 | 1.60%  | 0 CE34473 WBGene00007975 status:Par |                                    |
| F01F1.9           | 0 | 1 | 0 | 1 | 0      | 4.00%                               | CE01235 WBGene00017163 status:Co   |
| Reverse_K12F2.2a  | 0 | 1 | 0 | 1 | 0      | 1.60%                               | CE31041 WBGene00006874 locus:vab   |
| Reverse_K12F2.2b  | 0 | 1 | 0 | 1 | 0      | 2.90%                               | CE23870 WBGene00006874 locus:vab   |
| C52E4.6a          | 0 | 1 | 0 | 1 | 0      | 3.50%                               | CE17597 WBGene00000876 locus:cyl-  |
| C44C1.4a          | 0 | 1 | 0 | 1 | 0      | 1.30%                               | CE04214 WBGene00016643 locus:vps-  |
| T21H3.3           | 0 | 1 | 0 | 1 | 0      | 11.40%                              | CE13902 WBGene00000552 locus:cmc   |
| M03A8.1           | 0 | 1 | 0 | 1 | 0      | 3.70%                               | CE04770 WBGene00000991 locus:dhs   |
| ZC155.3           | 0 | 1 | 0 | 1 | 0      | 1.50%                               | CE23442 WBGene00022531 locus:mor   |
| Y62E10A.12        | 0 | 1 | 0 | 1 | 0      | 11.80%                              | CE28143 WBGene00003077 locus:ism-  |
| T02H6.1a          | 0 | 1 | 0 | 1 | 0      | 1.50%                               | CE23942 WBGene00020171 status:Par  |
| F11G11.9          | 1 | 0 | 1 | 0 | 7.60%  | 0 CE09351 WBGene00017387 status:Par |                                    |
| F21F8.3           | 0 | 1 | 0 | 1 | 0      | 4.10%                               | CE09539 WBGene00000218 locus:asp   |
| B0336.12          | 1 | 0 | 1 | 0 | 18.30% | 0 CE00780 WBGene00015149 status:Pre |                                    |
| T04F3.1           | 1 | 0 | 1 | 0 | 0.60%  | 0 CE39626 WBGene00011436 1-aminoc   |                                    |
| Y59A8B.6          | 1 | 0 | 1 | 0 | 1.20%  | 0 CE28858 WBGene00013343 status:Par |                                    |
| C15A11.3          | 0 | 1 | 0 | 1 | 0      | 2.40%                               | CE36685 WBGene00004944 locus:sol-  |
| CC4.3             | 1 | 0 | 1 | 0 | 3.50%  | 0 CE15742 WBGene00004895 locus:smL  |                                    |
| H27M09.2          | 0 | 1 | 0 | 1 | 0      | 8.10%                               | CE23831 WBGene00019246 RNA polyI   |
| C44E4.6           | 0 | 1 | 0 | 1 | 0      | 20.90%                              | CE08720 WBGene00016655 locus:acb   |
| C44E4.4           | 0 | 1 | 0 | 1 | 0      | 4.00%                               | CE08718 WBGene00016653 RNA-bind    |
| F45F2.13          | 0 | 1 | 0 | 1 | 0      | 6.60%                               | CE03253 WBGene00001880 locus:his-  |
| F53H10.2          | 0 | 1 | 0 | 1 | 0      | 1.30%                               | CE32433 WBGene00010012 Zinc finge  |
| Y37E3.10          | 0 | 1 | 0 | 1 | 0      | 5.30%                               | CE29373 WBGene00021351 status:Co   |
| T23B5.1c          | 0 | 1 | 0 | 1 | 0      | 5.50%                               | CE39780 WBGene00011939 status:Co   |
| Y48B6A.14         | 0 | 1 | 0 | 1 | 0      | 13.70%                              | CE29377 WBGene00001971 locus:hmg   |
| F54E12.1          | 0 | 1 | 0 | 1 | 0      | 6.60%                               | CE03253 WBGene00001929 locus:his-  |
| T20F5.6           | 0 | 1 | 0 | 1 | 0      | 1.80%                               | CE28685 WBGene00020628 zinc finge  |
| Y76B12C.6         | 0 | 1 | 0 | 1 | 0      | 2.90%                               | CE34618 WBGene00022300 status:Par  |
| T03F6.1           | 0 | 1 | 0 | 1 | 0      | 5.50%                               | CE16335 WBGene00011398 locus:qdpI  |
| C14F11.1a         | 0 | 1 | 0 | 1 | 0      | 3.90%                               | CE02477 WBGene00015778 Aspartate   |
| F23F12.6          | 0 | 1 | 0 | 1 | 0      | 4.30%                               | CE01253 WBGene00004503 locus:rpt-  |
| C27B7.1b          | 0 | 1 | 0 | 1 | 0      | 3.50%                               | CE03030 WBGene00005007 locus:spr-  |
| C27B7.1a          | 0 | 1 | 0 | 1 | 0      | 3.50%                               | CE27804 WBGene00005007 locus:spr-  |
| F29F11.6          | 0 | 1 | 0 | 1 | 0      | 4.30%                               | CE20735 WBGene00001747 locus:gsp   |
| Reverse_Y60A3A.10 | 0 | 1 | 0 | 1 | 0      | 3.90%                               | CE38457 WBGene00000987 locus:dhs   |
| Y71F9AL.9         | 0 | 1 | 0 | 1 | 0      | 7.30%                               | CE22858 WBGene00022114 status:Co   |
| C07G2.3a          | 0 | 1 | 0 | 1 | 0      | 3.90%                               | CE02985 WBGene00000380 locus:cct-  |
| Y49E10.6          | 0 | 1 | 0 | 1 | 0      | 6.60%                               | CE22223 WBGene00001946 locus:his-  |
| Reverse_W05B2.4   | 0 | 1 | 0 | 1 | 0      | 0.60%                               | CE20146 WBGene00012272 status:Pre  |
| M03F8.3           | 1 | 0 | 1 | 0 | 2.40%  | 0 CE28622 WBGene00019762 status:Par |                                    |
| R05D3.7           | 0 | 1 | 0 | 1 | 0      | 2.00%                               | CE26945 WBGene00006840 locus:unc   |

|                 |   |   |   |   |        |                                       |                                    |
|-----------------|---|---|---|---|--------|---------------------------------------|------------------------------------|
| W07B8.3         | 0 | 1 | 0 | 1 | 0      | 5.90%                                 | CE28510 WBGene00021071 status:Pa   |
| T05E11.3        | 0 | 1 | 0 | 1 | 0      | 1.80%                                 | CE06362 WBGene00011480 endoplasr   |
| ZK112.2         | 0 | 1 | 0 | 1 | 0      | 1.20%                                 | CE00373 WBGene00003559 locus:ncl-  |
| C46F11.4        | 0 | 1 | 0 | 1 | 0      | 2.60%                                 | CE17559 WBGene00008119 ATP-depe    |
| Y46G5A.4        | 0 | 1 | 0 | 1 | 0      | 0.70%                                 | CE21971 WBGene00012896 status:Pa   |
| F55G1.13        | 1 | 0 | 1 | 0 | 2.80%  | 0 CE07289 WBGene00018906 status:Pa    |                                    |
| T17H7.4j        | 1 | 0 | 1 | 0 | 2.00%  | 0 CE31617 WBGene00001573 locus:gei-   |                                    |
| T17H7.4i        | 1 | 0 | 1 | 0 | 3.10%  | 0 CE31616 WBGene00001573 locus:gei-   |                                    |
| T17H7.4h        | 1 | 0 | 1 | 0 | 3.50%  | 0 CE31615 WBGene00001573 locus:gei-   |                                    |
| T17H7.4g        | 1 | 0 | 1 | 0 | 3.70%  | 0 CE31614 WBGene00001573 locus:gei-   |                                    |
| T17H7.4l        | 1 | 0 | 1 | 0 | 3.60%  | 0 CE33939 WBGene00001573 locus:gei-   |                                    |
| T17H7.4k        | 1 | 0 | 1 | 0 | 2.10%  | 0 CE31618 WBGene00001573 locus:gei-   |                                    |
| T17H7.4b        | 1 | 0 | 1 | 0 | 2.30%  | 0 CE28671 WBGene00001573 locus:gei-   |                                    |
| K10C3.6a        | 0 | 1 | 0 | 1 | 0      | 2.70%                                 | CE12084 WBGene00003639 locus:nhr-  |
| T17H7.4a        | 1 | 0 | 1 | 0 | 2.10%  | 0 CE28670 WBGene00001573 locus:gei-   |                                    |
| T17H7.4f        | 1 | 0 | 1 | 0 | 3.70%  | 0 CE31613 WBGene00001573 locus:gei-   |                                    |
| T17H7.4e        | 1 | 0 | 1 | 0 | 2.90%  | 0 CE31612 WBGene00001573 locus:gei-   |                                    |
| T17H7.4c        | 1 | 0 | 1 | 0 | 2.00%  | 0 CE28672 WBGene00001573 locus:gei-   |                                    |
| K10C3.6c        | 0 | 1 | 0 | 1 | 0      | 2.60%                                 | CE32693 WBGene00003639 locus:nhr-  |
| K10C3.6b        | 0 | 1 | 0 | 1 | 0      | 2.70%                                 | CE28943 WBGene00003639 locus:nhr-  |
| K10C3.6d        | 0 | 1 | 0 | 1 | 0      | 2.70%                                 | CE32694 WBGene00003639 locus:nhr-  |
| Y49F6B.2        | 0 | 1 | 0 | 1 | 0      | 4.80%                                 | CE25336 WBGene00021715 status:Co   |
| W09D6.5         | 0 | 1 | 0 | 1 | 0      | 7.00%                                 | CE19019 WBGene00012358 status:Co   |
| C50F2.6b        | 0 | 1 | 0 | 1 | 0      | 4.00%                                 | CE27878 WBGene00001430 locus:fk-   |
| C50F2.6a        | 0 | 1 | 0 | 1 | 0      | 4.50%                                 | CE08912 WBGene00001430 locus:fk-   |
| F44C4.3         | 0 | 1 | 0 | 1 | 0      | 5.40%                                 | CE07251 WBGene00000784 locus:cpr-  |
| Y59H11AR.2b     | 1 | 0 | 1 | 0 | 1.20%  | 0 CE33894 WBGene00022010 status:Pa    |                                    |
| Y59H11AR.2a     | 1 | 0 | 1 | 0 | 1.20%  | 0 CE29894 WBGene00022010 status:Pa    |                                    |
| C29F3.1         | 0 | 1 | 0 | 1 | 0      | 1.60%                                 | CE08435 WBGene00001150 locus:ech-  |
| K02E11.1        | 0 | 1 | 0 | 1 | 0      | 1.60%                                 | CE37978 WBGene00010510 locus:ent-  |
| R11E3.7a        | 0 | 1 | 0 | 1 | 0      | 2.60%                                 | CE19549 WBGene00001060 locus:dpf-  |
| Y71F9AL.17      | 0 | 1 | 0 | 1 | 0      | 1.10%                                 | CE29136 WBGene00022119 coatomer,   |
| C05D11.1        | 0 | 1 | 0 | 1 | 0      | 1.20%                                 | CE03926 WBGene00015481 status:Co   |
| R06B10.5        | 0 | 1 | 0 | 1 | 0      | 3.40%                                 | CE31050 WBGene00019915 status:Co   |
| T25B9.7         | 0 | 1 | 0 | 1 | 0      | 1.10%                                 | CE32939 WBGene00012013 locus:ugt-  |
| Y113G7A.3       | 0 | 1 | 0 | 1 | 0      | 2.10%                                 | CE27230 WBGene00004754 locus:sec-  |
| Y48G10A.6       | 1 | 0 | 1 | 0 | 16.50% | 0 CE35092 WBGene00013023 status:Co    |                                    |
| F25H8.2         | 0 | 1 | 0 | 1 | 0      | 2.30%                                 | CE05728 WBGene00009132 status:Co   |
| F44G3.6         | 0 | 1 | 0 | 1 | 0      | 7.80%                                 | CE16037 WBGene00004809 locus:skr-  |
| T08B2.7c        | 0 | 1 | 0 | 1 | 0      | 1.70%                                 | CE30299 WBGene00020347 status:Pa   |
| T08B2.7b        | 0 | 1 | 0 | 1 | 0      | 1.60%                                 | CE26950 WBGene00020347 3-hydroxy   |
| T08B2.7a        | 0 | 1 | 0 | 1 | 0      | 1.50%                                 | CE13431 WBGene00020347 3-hydroxy   |
| Reverse_F33E2.3 | 1 | 0 | 1 | 0 | 1.20%  | 0 CE09904 WBGene00009359 Lectin C-t   |                                    |
| Y69H2.7         | 1 | 0 | 1 | 0 | 3.20%  | 0 CE41482 WBGene00013482 status:Pa    |                                    |
| F54D11.1        | 0 | 1 | 0 | 1 | 0      | 3.00%                                 | CE11068 WBGene00018811 locus:pmt-  |
| C17H12.14       | 0 | 1 | 0 | 1 | 0      | 4.40%                                 | CE19362 WBGene00006917 locus:vha-  |
| T05G5.10        | 1 | 0 | 1 | 0 | 4.10%  | 0 CE37787 WBGene00002064 locus:iff-1  |                                    |
| ZK970.3         | 0 | 1 | 0 | 1 | 0      | 5.70%                                 | CE02403 WBGene00007022 locus:mdt   |
| Y57G11A.3       | 0 | 1 | 0 | 1 | 0      | 6.00%                                 | CE14912 WBGene00013291 LIM doma    |
| K06C4.13        | 0 | 1 | 0 | 1 | 0      | 6.60%                                 | CE03253 WBGene00001901 locus:his-  |
| F01G10.1        | 0 | 1 | 0 | 1 | 0      | 2.60%                                 | CE09163 WBGene00008506 transketol  |
| C26E6.3         | 1 | 0 | 1 | 0 | 4.00%  | 0 CE32144 WBGene00016139 cell differe |                                    |
| F09G2.9         | 0 | 1 | 0 | 1 | 0      | 3.40%                                 | CE09304 WBGene00017317 status:Co   |
| Y110A7A.14      | 0 | 1 | 0 | 1 | 0      | 8.00%                                 | CE30307 WBGene00003924 locus:pas   |
| T06E6.1         | 0 | 1 | 0 | 1 | 0      | 3.20%                                 | CE13313 WBGene00011538 status:Par  |
| Y62F5A.1b       | 0 | 1 | 0 | 1 | 0      | 4.70%                                 | CE24545 WBGene00007013 locus:mdt   |
| Y62F5A.1a       | 0 | 1 | 0 | 1 | 0      | 4.30%                                 | CE24544 WBGene00007013 locus:mdt   |
| F22A3.2         | 0 | 1 | 0 | 1 | 0      | 17.90%                                | CE38505 WBGene00017688 status:Co   |
| F37C4.5a        | 0 | 1 | 0 | 1 | 0      | 2.30%                                 | CE17048 WBGene00018145 status:Co   |
| B0213.3         | 0 | 1 | 0 | 1 | 0      | 15.40%                                | CE16774 WBGene00003766 locus:nlp-  |
| B0213.6         | 0 | 1 | 0 | 1 | 0      | 13.30%                                | CE16777 WBGene00003769 locus:nlp-  |
| B0213.4         | 0 | 1 | 0 | 1 | 0      | 13.70%                                | CE16775 WBGene00003767 locus:nlp-  |
| B0213.5         | 0 | 1 | 0 | 1 | 0      | 14.50%                                | CE16776 WBGene00003768 locus:nlp-  |
| Y45F10A.3       | 1 | 0 | 1 | 0 | 7.70%  | 0 CE40482 WBGene00012866 status:Pa    |                                    |
| R06C1.4         | 0 | 1 | 0 | 1 | 0      | 15.50%                                | CE18119 WBGene00011059 RNA reco    |
| C27F2.10        | 0 | 1 | 0 | 1 | 0      | 2.20%                                 | CE29189 WBGene00016171 status:Co   |
| F26F12.7        | 0 | 1 | 0 | 1 | 0      | 1.10%                                 | CE17716 WBGene00002637 locus:let-4 |
| F01G12.6        | 0 | 1 | 0 | 1 | 0      | 4.50%                                 | CE07015 WBGene00017171 status:Pa   |
| C52E4.2         | 0 | 1 | 0 | 1 | 0      | 14.20%                                | CE08944 WBGene00003235 locus:mif-  |
| W03G9.4         | 0 | 1 | 0 | 1 | 0      | 2.90%                                 | CE14560 WBGene00000155 locus:app   |
| R119.4          | 0 | 1 | 0 | 1 | 0      | 3.20%                                 | CE23925 WBGene00004143 locus:pgn   |
| C56G2.7         | 0 | 1 | 0 | 1 | 0      | 5.10%                                 | CE30640 WBGene00016981 status:Co   |
| T10H9.4         | 0 | 1 | 0 | 1 | 0      | 14.70%                                | CE18252 WBGene00004897 locus:snb   |
| Y48G9A.1        | 0 | 1 | 0 | 1 | 0      | 1.10%                                 | CE30024 WBGene00021695 status:Pa   |
| F46E10.10c      | 0 | 1 | 0 | 1 | 0      | 6.60%                                 | CE33097 WBGene00018491 status:Co   |
| F46E10.10b      | 0 | 1 | 0 | 1 | 0      | 6.20%                                 | CE33096 WBGene00018491 status:Co   |
| F15E11.14       | 0 | 1 | 0 | 1 | 0      | 10.40%                                | CE16999 WBGene00017500 status:Pa   |
| K04G7.3b        | 0 | 1 | 0 | 1 | 0      | 1.20%                                 | CE39588 WBGene00003858 locus:ogt-  |
| K04G7.3a        | 0 | 1 | 0 | 1 | 0      | 1.00%                                 | CE25042 WBGene00003858 locus:ogt-  |
| T08G2.3         | 0 | 1 | 0 | 1 | 0      | 3.10%                                 | CE07473 WBGene00020366 acyl-CoA    |
| F15B10.3        | 1 | 0 | 1 | 0 | 9.50%  | 0 CE16989 WBGene00017481 status:Co    |                                    |



|                    |   |   |   |   |        |        |                                    |
|--------------------|---|---|---|---|--------|--------|------------------------------------|
| R09H3.1            | 1 | 0 | 1 | 0 | 0.90%  | 0      | CE07445 WBGene00019990 status:Pre  |
| T28B8.1            | 0 | 1 | 0 | 1 | 0      | 10.60% | CE14329 WBGene00012113 status:Co   |
| K08E7.5b           | 1 | 0 | 1 | 0 | 2.00%  | 0      | CE39390 WBGene00010673 status:Par  |
| K08E7.5c           | 1 | 0 | 1 | 0 | 1.10%  | 0      | CE39747 WBGene00010673 status:Par  |
| K08E7.5a           | 1 | 0 | 1 | 0 | 0.80%  | 0      | CE11924 WBGene00010673 status:Par  |
| K08E7.5d           | 1 | 0 | 1 | 0 | 1.80%  | 0      | CE39392 WBGene00010673 status:Par  |
| Y39A1A.1c          | 0 | 1 | 0 | 1 | 0      | 4.20%  | CE37799 WBGene00012641 status:Co   |
| Y39A1A.1a          | 0 | 1 | 0 | 1 | 0      | 3.90%  | CE33215 WBGene00012641 status:Par  |
| Y39A1A.1b          | 0 | 1 | 0 | 1 | 0      | 3.90%  | CE33216 WBGene00012641 status:Par  |
| K06H7.4            | 0 | 1 | 0 | 1 | 0      | 3.80%  | CE26942 WBGene00001743 locus:grp-  |
| F40A3.3a           | 0 | 1 | 0 | 1 | 0      | 5.90%  | CE10146 WBGene00018218 phosphati   |
| F40A3.3b           | 0 | 1 | 0 | 1 | 0      | 7.00%  | CE38516 WBGene00018218 status:Co   |
| Y43F8C.6           | 0 | 1 | 0 | 1 | 0      | 3.30%  | CE34120 WBGene00012828 status:Par  |
| F01F1.8b           | 0 | 1 | 0 | 1 | 0      | 3.50%  | CE30647 WBGene00000381 locus:cct-l |
| B0513.3            | 0 | 1 | 0 | 1 | 0      | 11.30% | CE15559 WBGene00004443 locus:rpl-2 |
| B0244.2            | 0 | 1 | 0 | 1 | 0      | 2.00%  | CE31867 WBGene00002048 locus:ida-  |
| C18E9.2a           | 1 | 0 | 1 | 0 | 3.60%  | 0      | CE34703 WBGene00007683 Drosophili  |
| Y71H10B.1c         | 0 | 1 | 0 | 1 | 0      | 1.60%  | CE33740 WBGene00022201 status:Par  |
| Y71H10B.1a         | 0 | 1 | 0 | 1 | 0      | 1.60%  | CE29140 WBGene00022201 status:Co   |
| Y71H10B.1b         | 0 | 1 | 0 | 1 | 0      | 1.60%  | CE28267 WBGene00022201 status:Par  |
| T28D6.6            | 1 | 0 | 1 | 0 | 4.40%  | 0      | CE24022 WBGene00012126 status:Co   |
| C43E11.9           | 0 | 1 | 0 | 1 | 0      | 6.70%  | CE08687 WBGene00016607 status:Co   |
| T01D3.7            | 0 | 1 | 0 | 1 | 0      | 0.60%  | CE40998 WBGene00045409 status:Par  |
| F25H2.9            | 0 | 1 | 0 | 1 | 0      | 5.20%  | CE09654 WBGene00003926 locus:pas   |
| C29F5.4b           | 0 | 1 | 0 | 1 | 0      | 7.30%  | CE02511 WBGene00003403 locus:mpe   |
| C29F5.4a           | 0 | 1 | 0 | 1 | 0      | 8.60%  | CE33602 WBGene00003403 locus:mpe   |
| Y54E5B.3a          | 0 | 1 | 0 | 1 | 0      | 5.50%  | CE19227 WBGene00002324 locus:let-4 |
| Y54E5B.3b          | 0 | 1 | 0 | 1 | 0      | 5.60%  | CE28136 WBGene00002324 locus:let-4 |
| W09H1.6b           | 1 | 0 | 1 | 0 | 4.60%  | 0      | CE16577 WBGene00002264 locus:lec-  |
| W09H1.6a           | 1 | 0 | 1 | 0 | 4.70%  | 0      | CE16576 WBGene00002264 locus:lec-  |
| B0511.6            | 0 | 1 | 0 | 1 | 0      | 2.60%  | CE26853 WBGene00015232 helicase s  |
| ZK632.12           | 0 | 1 | 0 | 1 | 0      | 6.00%  | CE01110 WBGene00014019 PH (pleck)  |
| B0350.2a           | 0 | 1 | 0 | 1 | 0      | 0.70%  | CE06702 WBGene00006780 locus:unc   |
| F02A9.2            | 0 | 1 | 0 | 1 | 0      | 6.60%  | CE00133 WBGene00001385 locus:far-  |
| F35C11.5           | 1 | 0 | 1 | 0 | 2.50%  | 0      | CE03285 WBGene00009404 phospholi   |
| B0303.3            | 0 | 1 | 0 | 1 | 0      | 2.70%  | CE00561 WBGene00015125 Acetyl-co   |
| F21H12.1           | 0 | 1 | 0 | 1 | 0      | 2.40%  | CE32634 WBGene00017683 status:Co   |
| F10E7.7            | 0 | 1 | 0 | 1 | 0      | 6.50%  | CE04362 WBGene00004447 locus:rpl-3 |
| F55A3.3            | 1 | 0 | 1 | 0 | 1.40%  | 0      | CE17113 WBGene00018849 transcriptp |
| B0205.13           | 1 | 0 | 1 | 0 | 12.10% | 0      | CE39199 WBGene00044644 status:Co   |
| T19B10.3           | 1 | 0 | 1 | 0 | 1.20%  | 0      | CE37992 WBGene00011832 beta-galar  |
| R05H5.3            | 1 | 0 | 1 | 0 | 7.40%  | 0      | CE02290 WBGene00011038 thioredoxi  |
| F07B7.5            | 0 | 1 | 0 | 1 | 0      | 6.60%  | CE03253 WBGene00001923 locus:his-  |
| C28D4.3            | 0 | 1 | 0 | 1 | 0      | 4.30%  | CE08432 WBGene00001607 locus:glu-  |
| F55G1.2            | 0 | 1 | 0 | 1 | 0      | 6.60%  | CE03253 WBGene00001933 locus:his-  |
| C27H6.4a           | 0 | 1 | 0 | 1 | 0      | 6.20%  | CE08428 WBGene00007786 status:Co   |
| C27H6.4b           | 0 | 1 | 0 | 1 | 0      | 5.10%  | CE31322 WBGene00007786 status:Par  |
| F45F2.2            | 0 | 1 | 0 | 1 | 0      | 13.00% | CE36851 WBGene00001913 locus:his-  |
| F54D8.3a           | 0 | 1 | 0 | 1 | 0      | 1.80%  | CE29809 WBGene00000107 locus:alh-  |
| F54D8.3b           | 0 | 1 | 0 | 1 | 0      | 2.10%  | CE32434 WBGene00000107 locus:alh-  |
| Y17G7B.7           | 0 | 1 | 0 | 1 | 0      | 6.10%  | CE19040 WBGene00006601 locus:tpi-1 |
| C36B1.4            | 0 | 1 | 0 | 1 | 0      | 4.70%  | CE05371 WBGene00003925 locus:pas   |
| F42A10.5           | 0 | 1 | 0 | 1 | 0      | 7.00%  | CE01296 WBGene00018341 status:Co   |
| Reverse_F17C8.3    | 1 | 0 | 1 | 0 | 0.80%  | 0      | CE35179 WBGene00008910 status:Par  |
| ZK822.2            | 0 | 1 | 0 | 1 | 0      | 7.70%  | CE37867 WBGene00014090 status:Co   |
| B0272.3            | 0 | 1 | 0 | 1 | 0      | 4.90%  | CE00852 WBGene00007129 3-hydroxy   |
| C29E4.3b           | 1 | 0 | 1 | 0 | 1.50%  | 0      | CE30621 WBGene00004303 locus:ran-  |
| C29E4.3a           | 1 | 0 | 1 | 0 | 1.50%  | 0      | CE37483 WBGene00004303 locus:ran-  |
| Y18D10A.19         | 0 | 1 | 0 | 1 | 0      | 13.00% | CE21417 WBGene00001427 locus:fkbc  |
| F46A9.5            | 1 | 0 | 1 | 0 | 7.40%  | 0      | CE10580 WBGene00004807 locus:skr-  |
| C06B8.8            | 0 | 1 | 0 | 1 | 0      | 25.70% | CE20485 WBGene00004452 locus:rpl-3 |
| C45G7.5            | 1 | 0 | 1 | 0 | 1.00%  | 0      | CE38044 WBGene00000402 locus:cdh   |
| F29G6.3c           | 0 | 1 | 0 | 1 | 0      | 1.70%  | CE36484 WBGene00009259 status:Par  |
| F29G6.3a           | 0 | 1 | 0 | 1 | 0      | 3.20%  | CE36483 WBGene00009259 status:Co   |
| R04A9.4            | 1 | 0 | 1 | 0 | 7.00%  | 0      | CE04791 WBGene00002060 locus:ife-2 |
| F40F11.3           | 0 | 1 | 0 | 1 | 0      | 15.10% | CE05862 WBGene00009588 status:Par  |
| ZK593.1            | 0 | 1 | 0 | 1 | 0      | 2.10%  | CE24731 WBGene00014001 pyruvate l  |
| H21P03.2           | 0 | 1 | 0 | 1 | 0      | 2.30%  | CE40081 WBGene00010409 status:Par  |
| Y47G6A.6           | 1 | 0 | 1 | 0 | 1.80%  | 0      | CE24372 WBGene00021636 locus:pca   |
| Reverse_Y49E10.23a | 0 | 1 | 0 | 1 | 0      | 1.00%  | CE22238 WBGene00013042 status:Par  |
| Reverse_Y49E10.23b | 0 | 1 | 0 | 1 | 0      | 0.90%  | CE32078 WBGene00013042 status:Par  |
| ZC373.2            | 1 | 0 | 1 | 0 | 19.70% | 0      | CE02375 WBGene00013867 status:Par  |
| Y47G6A.18          | 0 | 1 | 0 | 1 | 0      | 5.00%  | CE24362 WBGene00021644 status:Par  |
| ZK430.1            | 0 | 1 | 0 | 1 | 0      | 1.00%  | CE05078 WBGene00022739 status:Par  |
| Y37A1B.2d          | 1 | 0 | 1 | 0 | 2.10%  | 0      | CE32247 WBGene00003086 locus:lst-4 |
| Y37A1B.2c          | 1 | 0 | 1 | 0 | 2.10%  | 0      | CE32246 WBGene00003086 locus:lst-4 |
| Y37A1B.2b          | 1 | 0 | 1 | 0 | 2.00%  | 0      | CE32245 WBGene00003086 locus:lst-4 |
| Y54E10A.10         | 0 | 1 | 0 | 1 | 0      | 4.40%  | CE24439 WBGene00021830 status:Co   |
| F31C3.1            | 0 | 1 | 0 | 1 | 0      | 3.90%  | CE17730 WBGene00000881 locus:cyn-  |
| R07E5.2            | 0 | 1 | 0 | 1 | 0      | 5.30%  | CE00657 WBGene00011110 locus:prdx  |
| Y45F10D.7          | 0 | 1 | 0 | 1 | 0      | 2.00%  | CE39843 WBGene00012887 status:Par  |

|                   |   |   |   |   |       |                                    |                                    |
|-------------------|---|---|---|---|-------|------------------------------------|------------------------------------|
| JC8.11a           | 0 | 1 | 0 | 1 | 0     | 16.70%                             | CE28343 WBGene00010441 status:Pa   |
| F13D12.4a         | 0 | 1 | 0 | 1 | 0     | 3.30%                              | CE02183 WBGene00000114 locus:alh-  |
| EEED8.2           | 1 | 0 | 1 | 0 | 6.00% | CE01886 WBGene00017133 status:Co   |                                    |
| T24A6.11          | 0 | 1 | 0 | 1 | 0     | 2.80%                              | CE19591 WBGene00020750 locus:nhr-  |
| Y71H2B.6          | 1 | 0 | 1 | 0 | 7.00% | CE22945 WBGene00007019 locus:mdt   |                                    |
| C17E4.5           | 0 | 1 | 0 | 1 | 0     | 7.30%                              | CE08254 WBGene00003904 locus:pab   |
| H43I07.2          | 0 | 1 | 0 | 1 | 0     | 3.60%                              | CE29979 WBGene00019275 transferas  |
| C47D12.6a         | 0 | 1 | 0 | 1 | 0     | 1.40%                              | CE05434 WBGene00006617 locus:trs-  |
| C47D12.6b         | 0 | 1 | 0 | 1 | 0     | 1.50%                              | CE33765 WBGene00006617 locus:trs-  |
| Y66H1B.3          | 0 | 1 | 0 | 1 | 0     | 1.60%                              | CE20347 WBGene00022049 status:Pa   |
| K01G5.4           | 0 | 1 | 0 | 1 | 0     | 5.10%                              | CE16194 WBGene00004302 locus:ran-  |
| C24G6.8           | 0 | 1 | 0 | 1 | 0     | 5.10%                              | CE17464 WBGene00016062 status:Co   |
| C14B1.1           | 0 | 1 | 0 | 1 | 0     | 2.90%                              | CE00897 WBGene00003962 locus:pd-   |
| C14B1.4           | 0 | 1 | 0 | 1 | 0     | 2.90%                              | CE00901 WBGene00006474 locus:tag-  |
| K11E4.5a          | 0 | 1 | 0 | 1 | 0     | 3.60%                              | CE28244 WBGene00003661 locus:nhr-  |
| K11E4.5b          | 0 | 1 | 0 | 1 | 0     | 3.60%                              | CE37391 WBGene00003661 locus:nhr-  |
| T01B11.2a         | 0 | 1 | 0 | 1 | 0     | 3.00%                              | CE12894 WBGene00020139 aminotran   |
| T01B11.2b         | 0 | 1 | 0 | 1 | 0     | 8.80%                              | CE33686 WBGene00020139 status:Co   |
| Y47D3A.31         | 1 | 0 | 1 | 0 | 7.10% | CE22031 WBGene00012937 status:Co   |                                    |
| T05C12.7          | 0 | 1 | 0 | 1 | 0     | 3.60%                              | CE02319 WBGene00003777 locus:ccl-  |
| F55D10.2          | 1 | 0 | 1 | 0 | 7.50% | CE02777 WBGene00004438 locus:rpl-2 |                                    |
| F58E6.1b          | 0 | 1 | 0 | 1 | 0     | 2.10%                              | CE20893 WBGene00010251 status:Co   |
| C38D4.3           | 1 | 0 | 1 | 0 | 1.30% | CE36378 WBGene00003210 locus:mel-  |                                    |
| R07E4.6b          | 0 | 1 | 0 | 1 | 0     | 3.60%                              | CE28749 WBGene00002190 locus:kin-  |
| R07E4.6c          | 0 | 1 | 0 | 1 | 0     | 3.20%                              | CE04821 WBGene00002190 locus:kin-  |
| R07E4.6a          | 0 | 1 | 0 | 1 | 0     | 3.30%                              | CE39609 WBGene00002190 locus:kin-  |
| F10D11.1          | 1 | 0 | 1 | 0 | 6.30% | CE09323 WBGene00004931 locus:sod   |                                    |
| T02G5.13a         | 0 | 1 | 0 | 1 | 0     | 3.80%                              | CE31822 WBGene00020169 locus:mm    |
| T02G5.13b         | 0 | 1 | 0 | 1 | 0     | 5.00%                              | CE04865 WBGene00020169 locus:mm    |
| T27E9.7           | 0 | 1 | 0 | 1 | 0     | 2.40%                              | CE18971 WBGene00012097 locus:abc   |
| Y116A8A.9         | 0 | 1 | 0 | 1 | 0     | 4.70%                              | CE24146 WBGene00003130 locus:maf   |
| C54C6.1           | 0 | 1 | 0 | 1 | 0     | 7.70%                              | CE05493 WBGene00004451 locus:rpl-3 |
| Y45G12B.1c        | 0 | 1 | 0 | 1 | 0     | 2.70%                              | CE33341 WBGene00021562 locus:nuo   |
| Y45G12B.1a        | 0 | 1 | 0 | 1 | 0     | 2.30%                              | CE21933 WBGene00021562 locus:nuo   |
| F09E10.8b         | 0 | 1 | 0 | 1 | 0     | 2.60%                              | CE30940 WBGene00017298 locus:toca  |
| F38A5.7           | 0 | 1 | 0 | 1 | 0     | 14.20%                             | CE10038 WBGene00018164 status:Co   |
| K09E10.1          | 1 | 0 | 1 | 0 | 2.60% | CE12016 WBGene00019579 status:Pre  |                                    |
| T23G11.3          | 1 | 0 | 1 | 0 | 3.50% | CE14096 WBGene00001595 locus:glc-  |                                    |
| F15D4.2           | 0 | 1 | 0 | 1 | 0     | 6.60%                              | CE09415 WBGene00008859 status:Co   |
| Reverse_R148.1b   | 0 | 1 | 0 | 1 | 0     | 3.20%                              | CE41329 WBGene00020100 locus:xbx-  |
| Reverse_R148.1a   | 0 | 1 | 0 | 1 | 0     | 2.90%                              | CE40712 WBGene00020100 locus:xbx-  |
| F58B3.1           | 0 | 1 | 0 | 1 | 0     | 7.90%                              | CE06003 WBGene00003093 locus:lys-  |
| Reverse_Y53C12A.6 | 0 | 1 | 0 | 1 | 0     | 10.80%                             | CE14892 WBGene00013141 status:Pa   |
| Y37A1B.17b        | 1 | 0 | 1 | 0 | 1.60% | CE40431 WBGene00044989 status:Pa   |                                    |
| Y37A1B.17a        | 1 | 0 | 1 | 0 | 1.50% | CE40430 WBGene00044989 status:Pa   |                                    |
| C28H8.11c         | 0 | 1 | 0 | 1 | 0     | 8.00%                              | CE39680 WBGene00016201 status:Co   |
| C38C10.5b         | 0 | 1 | 0 | 1 | 0     | 1.00%                              | CE34529 WBGene00004343 locus:rgr-  |
| C38C10.5a         | 0 | 1 | 0 | 1 | 0     | 1.00%                              | CE34528 WBGene00004343 locus:rgr-  |
| E04F6.3           | 0 | 1 | 0 | 1 | 0     | 5.70%                              | CE01215 WBGene00017123 locus:mac   |
| W05F2.6           | 0 | 1 | 0 | 1 | 0     | 3.30%                              | CE21260 WBGene00021038 status:Pa   |
| F57B9.3           | 0 | 1 | 0 | 1 | 0     | 4.10%                              | CE01338 WBGene00018997 Eukaryoti   |
| R12H7.2           | 0 | 1 | 0 | 1 | 0     | 2.90%                              | CE03567 WBGene00000217 locus:asp   |
| T05H4.12          | 0 | 1 | 0 | 1 | 0     | 8.50%                              | CE13291 WBGene00020275 locus:atp-  |
| T26E3.7           | 0 | 1 | 0 | 1 | 0     | 10.40%                             | CE14196 WBGene00012040 ATP synth   |
| C03D6.5           | 0 | 1 | 0 | 1 | 0     | 7.30%                              | CE36095 WBGene00007277 locus:asf-  |
| W02D3.5           | 0 | 1 | 0 | 1 | 0     | 11.10%                             | CE14426 WBGene00002258 locus:lbp-  |
| K07A3.1           | 0 | 1 | 0 | 1 | 0     | 3.50%                              | CE21023 WBGene00001404 locus:fbp-  |
| ZK616.4           | 0 | 1 | 0 | 1 | 0     | 2.80%                              | CE31753 WBGene00022774 status:Co   |
| K04D7.3           | 0 | 1 | 0 | 1 | 0     | 2.70%                              | CE06092 WBGene00001794 locus:gta-  |
| B0041.8           | 0 | 1 | 0 | 1 | 0     | 6.00%                              | CE29528 WBGene00015011 status:Co   |
| F54H12.1c         | 0 | 1 | 0 | 1 | 0     | 2.50%                              | CE32436 WBGene00000041 locus:aco   |
| F54H12.1a         | 0 | 1 | 0 | 1 | 0     | 2.20%                              | CE25005 WBGene00000041 locus:aco   |
| F54H12.1b         | 0 | 1 | 0 | 1 | 0     | 2.60%                              | CE30144 WBGene00000041 locus:aco   |
| Reverse_B0213.4   | 0 | 1 | 0 | 1 | 0     | 13.70%                             | CE16775 WBGene00003767 locus:nlp-  |
| Reverse_B0213.3   | 0 | 1 | 0 | 1 | 0     | 15.40%                             | CE16774 WBGene00003766 locus:nlp-  |
| Reverse_B0213.5   | 0 | 1 | 0 | 1 | 0     | 14.50%                             | CE16776 WBGene00003768 locus:nlp-  |
| Reverse_B0213.6   | 0 | 1 | 0 | 1 | 0     | 13.30%                             | CE16777 WBGene00003769 locus:nlp-  |
| C27A2.2b          | 0 | 1 | 0 | 1 | 0     | 28.30%                             | CE29188 WBGene00004434 locus:rpl-2 |
| R11A5.4c          | 0 | 1 | 0 | 1 | 0     | 2.70%                              | CE36359 WBGene00011232 status:Co   |
| R11A5.4b          | 0 | 1 | 0 | 1 | 0     | 2.70%                              | CE36358 WBGene00011232 status:Par  |
| R11A5.4a          | 0 | 1 | 0 | 1 | 0     | 2.40%                              | CE12728 WBGene00011232 phosphoe    |
| R11A5.4d          | 0 | 1 | 0 | 1 | 0     | 2.60%                              | CE36360 WBGene00011232 status:Co   |
| Y77E11A.7a        | 1 | 0 | 1 | 0 | 2.60% | CE34430 WBGene00022310 status:Pa   |                                    |
| Y77E11A.7c        | 1 | 0 | 1 | 0 | 2.80% | CE37300 WBGene00022310 status:Pa   |                                    |
| Y77E11A.7b        | 1 | 0 | 1 | 0 | 2.70% | CE36902 WBGene00022310 status:Pa   |                                    |
| M03A1.7           | 0 | 1 | 0 | 1 | 0     | 10.30%                             | CE33427 WBGene00000928 locus:dao   |
| B0035.10          | 0 | 1 | 0 | 1 | 0     | 6.60%                              | CE03253 WBGene00001919 locus:his-  |
| Y38A8.2           | 0 | 1 | 0 | 1 | 0     | 7.40%                              | CE07571 WBGene00003949 locus:pbs   |
| F42E11.4          | 0 | 1 | 0 | 1 | 0     | 3.20%                              | CE03311 WBGene00006584 locus:tni-1 |
| H06H21.11         | 0 | 1 | 0 | 1 | 0     | 11.90%                             | CE38837 WBGene00044483 status:Pa   |
| F44B9.7           | 0 | 1 | 0 | 1 | 0     | 4.10%                              | CE29043 WBGene00004125 locus:pqn   |

|            |   |   |   |   |       |                                     |                                    |
|------------|---|---|---|---|-------|-------------------------------------|------------------------------------|
| F44B9.8    | 0 | 1 | 0 | 1 | 0     | 3.30%                               | CE37518 WBGene00018409 ARPA stat   |
| Y41E3.10b  | 0 | 1 | 0 | 1 | 0     | 2.30%                               | CE40788 WBGene00012768 status:Par  |
| F09F7.4b   | 0 | 1 | 0 | 1 | 0     | 3.00%                               | CE30654 WBGene00017301 status:Co   |
| F09F7.4a   | 0 | 1 | 0 | 1 | 0     | 2.80%                               | CE00689 WBGene00017301 Enoyl-Co    |
| W02D7.4    | 0 | 1 | 0 | 1 | 0     | 9.90%                               | CE14442 WBGene00020940 status:Par  |
| Y56A3A.17b | 0 | 1 | 0 | 1 | 0     | 2.00%                               | CE22585 WBGene00003802 locus:npp   |
| Y56A3A.17a | 0 | 1 | 0 | 1 | 0     | 2.00%                               | CE22584 WBGene00003802 locus:npp   |
| Y102A5A.1  | 0 | 1 | 0 | 1 | 0     | 1.20%                               | CE20378 WBGene00013606 locus:can   |
| T27F6.6    | 1 | 0 | 1 | 0 | 1.60% | 0 CE34214 WBGene00012105 status:Co  |                                    |
| ZC8.6      | 1 | 0 | 1 | 0 | 2.20% | 0 CE38988 WBGene00022501 status:Par |                                    |
| F56A8.6    | 0 | 1 | 0 | 1 | 0     | 11.90%                              | CE16126 WBGene00000774 locus:cpf-  |
| C26D10.2b  | 0 | 1 | 0 | 1 | 0     | 5.60%                               | CE32593 WBGene00001840 locus:hel-  |
| F22B3.2    | 0 | 1 | 0 | 1 | 0     | 6.60%                               | CE03253 WBGene00001937 locus:his-  |
| C47A10.1   | 0 | 1 | 0 | 1 | 0     | 1.00%                               | CE15714 WBGene00004003 locus:pgp   |
| K08D12.1   | 0 | 1 | 0 | 1 | 0     | 6.30%                               | CE25941 WBGene00003947 locus:pbs   |
| W03F9.9    | 1 | 0 | 1 | 0 | 6.40% | 0 CE14538 WBGene00021003 glucose 1  |                                    |
| C15F1.7b   | 0 | 1 | 0 | 1 | 0     | 10.80%                              | CE20508 WBGene00004930 locus:sod   |
| C15F1.7a   | 0 | 1 | 0 | 1 | 0     | 9.40%                               | CE23550 WBGene00004930 locus:sod   |
| C01F1.1    | 0 | 1 | 0 | 1 | 0     | 2.90%                               | CE06742 WBGene00015296 dna bindir  |
| Y53G8AR.9  | 0 | 1 | 0 | 1 | 0     | 5.70%                               | CE25419 WBGene00021816 status:Par  |
| ZK353.2    | 0 | 1 | 0 | 1 | 0     | 10.10%                              | CE00386 WBGene00022698 status:Par  |
| K08D10.4   | 0 | 1 | 0 | 1 | 0     | 3.40%                               | CE28597 WBGene00004385 locus:rnp-  |
| C08H9.2    | 0 | 1 | 0 | 1 | 0     | 1.50%                               | CE23530 WBGene00007463 high-dens   |
| Y71H10A.1a | 0 | 1 | 0 | 1 | 0     | 2.70%                               | CE28266 WBGene00022199 phosphofi   |
| F08G2.3    | 0 | 1 | 0 | 1 | 0     | 6.60%                               | CE03253 WBGene00001916 locus:his-  |
| F17E9.11   | 0 | 1 | 0 | 1 | 0     | 7.40%                               | CE07076 WBGene00003099 locus:lys-  |
| F17E9.10   | 0 | 1 | 0 | 1 | 0     | 6.60%                               | CE03253 WBGene00001906 locus:his-  |
| C49H3.9    | 0 | 1 | 0 | 1 | 0     | 7.40%                               | CE27873 WBGene00016794 status:Co   |
| F33A8.3    | 0 | 1 | 0 | 1 | 0     | 10.10%                              | CE17755 WBGene00000472 locus:cey-  |
| ZK1005.1b  | 0 | 1 | 0 | 1 | 0     | 0.90%                               | CE33259 WBGene00004053 locus:pme   |
| ZK1005.1a  | 0 | 1 | 0 | 1 | 0     | 0.90%                               | CE24712 WBGene00004053 locus:pme   |
| R74.7      | 0 | 1 | 0 | 1 | 0     | 3.60%                               | CE23932 WBGene00011281 status:Co   |
| F45H11.3   | 0 | 1 | 0 | 1 | 0     | 2.00%                               | CE33785 WBGene00009744 status:Par  |
| Y73F4A.2   | 0 | 1 | 0 | 1 | 0     | 6.50%                               | CE20368 WBGene00013515 status:Co   |
| T10B5.5a   | 0 | 1 | 0 | 1 | 0     | 2.20%                               | CE28255 WBGene00020391 status:Co   |
| T10B5.5b   | 0 | 1 | 0 | 1 | 0     | 2.60%                               | CE33316 WBGene00020391 status:Co   |
| F15E11.1   | 0 | 1 | 0 | 1 | 0     | 10.40%                              | CE16999 WBGene00017490 status:Par  |
| F48E8.5    | 0 | 1 | 0 | 1 | 0     | 2.90%                               | CE30997 WBGene00003901 locus:paa   |
| K02F3.11   | 1 | 0 | 1 | 0 | 5.20% | 0 CE29981 WBGene00004388 locus:rnp- |                                    |
| Y57A10C.6  | 0 | 1 | 0 | 1 | 0     | 3.90%                               | CE18418 WBGene00013284 3-keto-ac   |
| H06I04.3b  | 0 | 1 | 0 | 1 | 0     | 2.80%                               | CE38200 WBGene00019168 status:Co   |
| H06I04.3c  | 0 | 1 | 0 | 1 | 0     | 2.50%                               | CE38201 WBGene00019168 status:Par  |
| H06I04.3a  | 0 | 1 | 0 | 1 | 0     | 2.40%                               | CE23795 WBGene00019168 status:Co   |
| Y119C1B.8a | 0 | 1 | 0 | 1 | 0     | 1.80%                               | CE25214 WBGene00022473 locus:tag-  |
| Y119C1B.8b | 0 | 1 | 0 | 1 | 0     | 2.00%                               | CE33207 WBGene00022473 locus:tag-  |
| F55F8.5    | 0 | 1 | 0 | 1 | 0     | 2.70%                               | CE11196 WBGene00018893 locus:tag-  |
| F55F8.4    | 0 | 1 | 0 | 1 | 0     | 2.70%                               | CE11194 WBGene00018892 locus:cir-1 |
| K08E4.1    | 0 | 1 | 0 | 1 | 0     | 1.20%                               | CE06145 WBGene00005015 locus:spt-  |
| F56C9.1    | 0 | 1 | 0 | 1 | 0     | 4.20%                               | CE01319 WBGene00001748 locus:gsp   |
| W09G10.4a  | 0 | 1 | 0 | 1 | 0     | 1.70%                               | CE24044 WBGene00000162 locus:apd   |
| W09G10.4b  | 0 | 1 | 0 | 1 | 0     | 2.10%                               | CE28513 WBGene00000162 locus:apd   |
| D2023.2    | 0 | 1 | 0 | 1 | 0     | 1.50%                               | CE09072 WBGene00004258 locus:pyc-  |
| C31C9.2    | 0 | 1 | 0 | 1 | 0     | 5.00%                               | CE08497 WBGene00007836 D-3-Phos    |
| K08E3.8    | 0 | 1 | 0 | 1 | 0     | 3.90%                               | CE18874 WBGene00007025 locus:mdt   |
| F10G7.3    | 0 | 1 | 0 | 1 | 0     | 6.50%                               | CE39722 WBGene00017368 locus:asf-  |

Table S6

| Instrument | Filtering Parameter                                                                         |
|------------|---------------------------------------------------------------------------------------------|
| Orbitrap   | -p 2 -y 1 --trypstat --pfp 0.01 --modstat --extra --pl -DM 10 --DB --dm -in --brief --quiet |

| Phosphoproteomic analysis by mass spectrometry of CGH-1 complexes |                 |            |
|-------------------------------------------------------------------|-----------------|------------|
| Sequence                                                          | Spectral counts |            |
|                                                                   | vector RNAi     | kin-3 RNAi |
| R.ILDLMEK.G                                                       | 0               | 1          |
| L.YSATFPNTVTSFMQK.H                                               | 0               | 1          |
| Y.SATFPNTVTSFMQK.H                                                | 0               | 1          |
| R.NLVCSDLLTR.G                                                    | 0               | 1          |
| K.ITEIGYSCYIHSK.M                                                 | 0               | 1          |
| R.FGHLGVAINL.I                                                    | 0               | 1          |
| K.TLVLDEADK.L                                                     | 0               | 1          |
| R.TRIEPIPK.T                                                      | 0               | 2          |
| K.LYVADQQLVDAADSETTA.-                                            | 0               | 2          |
| K.TLVLDEADKLLSQDFQGILDR.L                                         | 0               | 28         |
| K.LQINQSIIFCNSTQR.V                                               | 0               | 3          |
| K.TGAYCIPVIEK.I                                                   | 0               | 1          |
| R.FKTADVTDTK.G                                                    | 1               | 0          |
| S.ATFPNTVTSFMQK.H                                                 | 1               | 0          |
| <b>M.S(79.9663)GAEQQQIVPANNGDENWK.A</b>                           | <b>1</b>        | <b>0</b>   |
| I.GVALTGQDILAR.A                                                  | 1               | 0          |
| K.VMVTGGTDLRDDIMR.L                                               | 1               | 0          |
| N.VVINDFPR.N                                                      | 1               | 0          |
| K.VMVTGGTDLR.D                                                    | 1               | 0          |
| R.DLLMGIFEK.G                                                     | 2               | 2          |
| R.VFHDFR.Q                                                        | 2               | 2          |
| K.AIQAMVIVPTR.E                                                   | 1               | 1          |
| R.FGHLGVAINL.I                                                    | 1               | 1          |
| K.LLSQDFQGILDR.L                                                  | 1               | 3          |
| R.NAETYLHR.I                                                      | 1               | 1          |
| K.GVEFEDFCLGR.D                                                   | 1               | 1          |
| R.ELALQTSQICVELSK.H                                               | 2               | 2          |
| A.SIGVALTGQDILAR.A                                                | 1               | 1          |
| G.VALTGQDILAR.A                                                   | 2               | 1          |
| R.LINFLPK.E                                                       | 1               | 2          |
| <b>Total</b>                                                      | <b>22</b>       | <b>60</b>  |

Table S7

| Strain ID | Genotype                                                                                | Source       |
|-----------|-----------------------------------------------------------------------------------------|--------------|
| N2        | <i>C. elegans</i> wild isolate; wild-type reference strain (WT)                         | CGC*         |
| MH2385    | <i>ain-1(ku322) X</i>                                                                   | CGC          |
| QK051     | <i>ain-1(tm3681) X</i>                                                                  | NBRP**       |
| GS5217    | <i>alg-1(gk214) X</i>                                                                   | IS Greenwald |
| QK045     | <i>alg-1(tm369) X</i>                                                                   | NBRP         |
| QK039     | <i>cgh-1(tn691) III; let-7(mg279) X</i>                                                 | this study   |
| QK040     | <i>cgh-1(tn691) III; let-7(mg279) X; xkls26 [Pcgh-1::cgh-1(WT)::GFP::unc-54 3'UTR]</i>  | this study   |
| QK041     | <i>cgh-1(tn691) III; let-7(mg279) X; xkls27 [Pcgh-1::cgh-1(S2A)::GFP::unc-54 3'UTR]</i> | this study   |
| QK042     | <i>cgh-1(tn691) III; let-7(mg279) X; xkls28 [Pcgh-1::cgh-1(S2A)::GFP::unc-54 3'UTR]</i> | this study   |
| QK043     | <i>cgh-1(tn691) III; let-7(mg279) X; xkls29 [Pcgh-1::cgh-1(S2D)::GFP::unc-54 3'UTR]</i> | this study   |
| QK044     | <i>cgh-1(tn691) III; let-7(mg279) X; xkls30 [Pcgh-1::cgh-1(S2E)::GFP::unc-54 3'UTR]</i> | this study   |
| QK032     | <i>eri-1(mg366) IV; mir-48(n4097) V</i>                                                 | this study   |
| CT11      | <i>hbl-1(mg285) X</i>                                                                   | CGC          |
| RG365     | <i>him-1(e879) I; vels13[col-19::gfp; rol-6(su1006)] V</i>                              | AE Rougvie   |
| VC1280    | <i>kin-10(ok1751) I/hT2 [bli-4(e937) let-?(q782) qIs48](I;III)</i>                      | CGC          |
| VC1609    | <i>kin-10(ok2031) I/hT2 [bli-4(e937) let-?(q782) qIs48](I;III)</i>                      | CGC          |
| GR1432    | <i>let-7(mg279) X</i>                                                                   | CGC          |
| MT7626    | <i>let-7(n2853) X</i>                                                                   | CGC          |
| SD551     | <i>let-60(ga89) IV</i>                                                                  | CGC          |
| CT8       | <i>lin-41(ma104) I</i>                                                                  | CGC          |
| QK004     | <i>lin-41(ma104) I; let-7(mg279) X</i>                                                  | this study   |
| MT14119   | <i>mir-35-41(nDf50) II</i>                                                              | CGC          |
| MT13650   | <i>mir-48(n4097) V</i>                                                                  | CGC          |
| QK003     | <i>mir-48(n4097) V; hbl-1(mg285) X</i>                                                  | this study   |
| MT13652   | <i>mir-48 (n4097) V; mir-84(n4037) X</i>                                                | CGC          |
| MT13651   | <i>mir-84(n4037) X</i>                                                                  | CGC          |
| OH3646    | <i>otIs114 [Plim-6::gfp] I; lsy-6(ot150) V</i>                                          | CGC          |
| QK005     | <i>otIs114 [Plim-6::gfp] I; lsy-6(ot150) V; nre-1(hd20) lin-15b(hd126) X</i>            | this study   |
| VH624     | <i>rhIs13 [unc-119::gfp, dpy-20(+)] V; nre-1(hd20) lin-15b(hd126) X</i>                 | CGC          |
| JR672     | <i>wIs54[scm::gfp] V</i>                                                                | JH Rothman   |
| QK006     | <i>xkls25 [Pkin-3::kin-3::GFP::kin-3 3'UTR]</i>                                         | this study   |
| QK052     | <i>xkls31 [Pmyo-3::gfp::mef-2 3'UTR]</i>                                                | this study   |
| QK053     | <i>xkEx9 [Pmyo-3::gfp::mef-2 3'UTR (scrambled miR-1 sites I and II)]</i>                | this study   |
| CT20      | <i>zals5 [alg-1P::GFP::alg-1 + pRF4(rol-6(su1006))]</i>                                 | CGC          |

\*CGC - Caenorhabditis Genetics Center, University of Minnesota, Minneapolis, MN.

\*\*NBRP - National Bioresource Project for *C. elegans*, Tokyo Women's Medical University School of Medicine, Japan.

**Table S8**

| <b>DNA Oligos</b>       |                                 |
|-------------------------|---------------------------------|
| ACGCTCGTGATGAGTTCAAG    | <i>eft-2</i> qPCR forward       |
| ATTTGGTCCAGTTCCGTCTG    | <i>eft-2</i> qPCR reverse       |
| GGTTCCAAATGCCACAAGAG    | <i>lin-41</i> qPCR forward      |
| AGGTCCAACCTGCCAAATCAG   | <i>lin-41</i> qPCR reverse      |
| GATCCTCCGATGAACGAAAA    | <i>daf-12</i> qPCR forward      |
| CTCTTCGGCTTCACCAGAAC    | <i>daf-12</i> qPCR reverse      |
| CTCACTGAGACTACATCAGC    | firefly luciferase qPCR forward |
| TCCAGATCCACAACCTTCGC    | firefly luciferase qPCR reverse |
| TCAATTTCGTTCCAAAACCTAcG | <i>kin-10</i> qPCR forward      |
| GTATTTCCGCCGCTGTTTCC    | <i>kin-10</i> qPCR reverse      |
| CTTCCAGGGAATTCTCGACCG   | <i>cgh-1</i> qPCR forward       |
| GCATGAACGAAGTGACGGTG    | <i>cgh-1</i> qPCR reverse       |

| <b>Starfire Probes</b>  |              |
|-------------------------|--------------|
| TACATACTTCTTTACATTCCA   | miR-1        |
| AACTATAACAACCTACTACCTCA | <i>let-7</i> |
| TCGCATCTACTGAGCCTACCTCA | miR-48       |
| TGCCGTAAGAACGATCTCA     | miR-58       |

| <b>Antigenic Peptides</b> |       |
|---------------------------|-------|
| QAGSLAPGVPIGNTSVSI(C)     | ALG-1 |
| WGDPPLSDVQYPLQPHASF(C)    | AIN-1 |
| (C)IEPIPKTVDPKLYVADQQLVDA | CGH-1 |
| MPPIPSRARVYAEVNPSRP(C)    | KIN-3 |
| (C)AEGLALADHRREPRLQTLVNDY | TSN-1 |
| (C)GRNNTPFNASDDAFPALGAK   | VIG-1 |

| <b>CGH-1 GST Peptides</b> |        |
|---------------------------|--------|
| MSGAEQQQIVPANNGDENWK      | site 1 |
| QEASIGVALTGQDILARAKN      | site 2 |
| LGVAINLITYEDRHTLRRIE      | site 3 |
| RRIEQELRTRIEPIPKTVDP      | site 4 |
